# Supplementary material for: Palladium metallaphotoredox-catalyzed 3-acylation of indole derivatives
Source: Royal Society of Chemistry journal article supplement (doi:10.1039/d2cc03658d), 2022-01-01
Supplement: d2cc03658d1.pdf [file d2cc03658d1.pdf]

# Palladium Metallaphotoredox-Catalyzed 3-Acylation of Indole Derivatives

*Xinmou Wang,<sup>†</sup> Mo Yu,<sup>†</sup> Hongjian Song,<sup>†</sup> Yuxiu Liu,<sup>†</sup> and Qingmin Wang<sup>\*†</sup>*

<sup>†</sup> State Key Laboratory of Elemento-Organic Chemistry, Research Institute of Elemento-Organic Chemistry, College of Chemistry, Frontiers Science Center for New Organic Matter, Nankai University, Tianjin 300071, People's Republic of China

E-mail: wangqm@nankai.edu.cn

## Supporting Information

### Content

|                                                         |    |
|---------------------------------------------------------|----|
| 1. General information .....                            | 2  |
| 2. Preparation of starting materials .....              | 2  |
| 3. Additional data for optimization of conditions ..... | 7  |
| 4. General procedure for the synthesis of 3a-3dd .....  | 9  |
| 5. Synthetic applications .....                         | 21 |
| 6 Mechanism experiments .....                           | 22 |
| 7 X-ray structure of 3a .....                           | 27 |
| 8. NMR spectrum.....                                    | 29 |
| 9. References.....                                      | 84 |

## 1. General information

Reagents were purchased from commercial sources and were used as received.  $^1\text{H}$  and  $^{13}\text{C}$  Nuclear Magnetic Resonance (NMR) spectra were recorded on Bruker Avance 400 Ultrashield NMR spectrometers.  $^{19}\text{F}$  NMR spectra were recorded on a Varian 400 instrument spectrometer. Chemical shifts ( $\delta$ ) were given in parts per million (ppm) and were measured downfield from internal tetramethylsilane. High-resolution mass spectrometry (HRMS) data were obtained on an FTICR-MS instrument (Ionspec 7.0 T, ESI/ Quadrupole Mass Analyzer, ESI-QMA). The melting points were determined on an X-4 microscope melting point apparatus and are uncorrected. Conversion was monitored by thin layer chromatography (TLC). Flash column chromatography was performed over silica gel (100-200 mesh). When heating is needed for reaction, we use heating mantle as heat source.

## 2. Preparation of starting materials

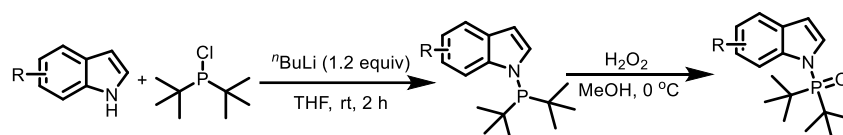

To a two-neck flask contained indole (3.0 mmol, 1.0 equiv) was added anhydrous THF (8 mL) under nitrogen. The reaction vessel was fitted with a rubber stopper and a three-way valve with nitrogen balloon, and was evacuated and back-filled with nitrogen. Subsequently, a solution of *n*BuLi (solution in hexanes, 3.6 mmol, 1.2 equiv) was added dropwise. After stirring for 15 min, chloro-dialkyl phosphine (3.6 mmol, 1.2 equiv) was added dropwise. The mixture was allowed to stir and warm to room temperature until complete by TLC analysis. Then, 1.2 mL of MeOH was added and most of the solvent was removed under reduced pressure. The residue was dissolved in 20 mL of MeOH (some DCM could be added to help dissolve) and cooled to 0 °C. Slow addition of excess H<sub>2</sub>O<sub>2</sub> (0.6 mL of 30% solution, approx. 6 mmol) caused the completion of oxidation process. After adding 4.8 mL of Na<sub>2</sub>SO<sub>3</sub> (2 M solution) dropwise, the solution was stirred for 2 h, allowed to warm to room temperature, treated with 7.2 mL of HCl (10% solution), and stirred for another hour. Most of MeOH was removed under reduced pressure, and the remaining residue was poured into 30 mL of H<sub>2</sub>O and extracted with DCM (3 × 25 mL). The combined organics were dried over Na<sub>2</sub>SO<sub>4</sub> and evaporated to give the crude product. Further purification was carried out by recrystallization or column chromatography (silica gel, petroleum ether /EtOAc /DCM).

### Di-tert-butyl(1H-indol-1-yl)phosphine oxide(1a)

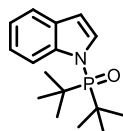

665 mg, 80 % white solid. R<sub>f</sub> = 0.5 (Hexane: Acetone = 3:1). (known compound)

$^1\text{H NMR}$  (400 MHz, CDCl<sub>3</sub>)  $\delta$  8.53 (d,  $J$  = 8.3 Hz, 1H), 7.58 (d,  $J$  = 7.7 Hz, 1H), 7.25 – 7.20 (m, 2H), 7.17 (t,  $J$  = 7.4 Hz, 1H), 6.68 (s, 1H), 1.34 (d,  $J$  = 14.7 Hz, 18H).

$^{13}\text{C NMR}$  (100 MHz, CDCl<sub>3</sub>)  $\delta$  141.7, 129.2 (d,  $J$  C-P = 5.3 Hz), 126.4 (d,  $J$  C-P = 5.0 Hz), 123.4, 121.5, 120.1, 116.3, 107.1 (d,  $J$  C-P = 5.0 Hz), 38.6 (d,  $J$  C-P = 69.1 Hz), 26.7.

$^{31}\text{P NMR}$  (162 MHz, CDCl<sub>3</sub>)  $\delta$  62.86.

---

The data is consist with previous literature.<sup>1</sup>

**Di-tert-butyl(5-methyl-1*H*-indol-1-yl)phosphine oxide(1b)**

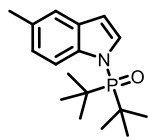

715 mg, 82 % white solid. R<sub>f</sub> = 0.5 (Hexane: Acetone = 3:1). (known compound)

<sup>1</sup>H NMR (400 MHz, CDCl<sub>3</sub>) δ 8.39 (dd, *J* = 8.4, 2.0 Hz, 1H), 7.37 (s, 1H), 7.20 (s, 1H), 7.06 (d, *J* = 8.5 Hz, 1H), 6.61 (d, *J* = 1.7 Hz, 1H), 2.43 (s, 3H), 1.33 (d, *J* = 14.6 Hz, 18H).

<sup>13</sup>C NMR (100 MHz, CDCl<sub>3</sub>) δ 139.9, 129.5 (d, *J* = 5.5 Hz), 126.5 (d, *J* = 4.7 Hz), 125.1, 120.02, 115.9, 106.8 (d, *J* = 8.7 Hz), 38.6 (d, *J* = 69.4 Hz), 26.7, 21.3.

<sup>31</sup>P NMR (162 MHz, CDCl<sub>3</sub>) δ 62.36.

The data is consist with previous literature.<sup>1</sup>

**Di-tert-butyl(6-methyl-1*H*-indol-1-yl)phosphine oxide(1c)**

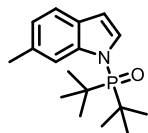

742 mg, 85 % white solid. R<sub>f</sub> = 0.5 (Hexane: Acetone = 3:1). (known compound)

<sup>1</sup>H NMR (400 MHz, CDCl<sub>3</sub>) δ 8.34 (s, 1H), 7.45 (d, *J* = 8.0 Hz, 1H), 7.16 (dd, *J* = 3.2, 1.0 Hz, 1H), 7.01 (d, *J* = 8.0 Hz, 1H), 6.66 – 6.60 (m, 1H), 2.45 (s, 3H), 1.34 (d, *J* = 14.6 Hz, 18H).

<sup>13</sup>C NMR (100 MHz, CDCl<sub>3</sub>) δ 142.1, 133.3, 126.9 (d, *J* = 5.6 Hz), 125.7 (d, *J* = 5.1 Hz), 123.2, 119.7, 116.1, 110.0, 106.9 (d, *J* = 5.0 Hz), 38.6 (d, *J* = 69.3 Hz), 26.7, 22.0.

<sup>31</sup>P NMR (162 MHz, CDCl<sub>3</sub>) δ 62.46.

The data is consist with previous literature.<sup>1</sup>

**Di-tert-butyl(7-methyl-1*H*-indol-1-yl)phosphine oxide(1d)**

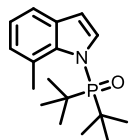

620 mg, 71 % white solid. R<sub>f</sub> = 0.5 (Hexane: Acetone = 3:1). (known compound)

<sup>1</sup>H NMR (400 MHz, CDCl<sub>3</sub>) δ 7.48 – 7.40 (m, 1H), 7.36 – 7.29 (m, 1H), 7.11 (d, *J* = 4.7 Hz, 2H), 6.71 (d, *J* = 2.1 Hz, 1H), 2.88 (s, 3H), 1.34 (d, *J* = 14.6 Hz, 18H).

<sup>13</sup>C NMR (100 MHz, CDCl<sub>3</sub>) δ 140.5, 131.4 (d, *J* = 4.4 Hz), 127.9 (d, *J* = 3.1 Hz), 127.6, 126.5, 122.0, 118.2 (d, *J* = 3.6 Hz), 107.9 (d, *J* = 4.2 Hz), 39.6 (d, *J* = 68.5 Hz), 27.3, 24.1.

<sup>31</sup>P NMR (162 MHz, CDCl<sub>3</sub>) δ 61.69.

The data is consist with previous literature.<sup>1</sup>

**Di-tert-butyl(5-fluoro-1*H*-indol-1-yl)phosphine oxide(1e)**

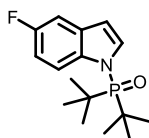

769 mg, 87 % white solid.  $R_f = 0.5$  (Hexane: Acetone = 3:1). (known compound)

$^1\text{H NMR}$  (400 MHz,  $\text{CDCl}_3$ )  $\delta$  8.46 (dd,  $J = 9.0, 4.7$  Hz, 1H), 7.26 (s, 1H), 7.19 (d,  $J = 8.1$  Hz, 1H), 6.94 (td,  $J = 9.0, 1.9$  Hz, 1H), 6.62 (s, 1H), 1.31 (d,  $J = 14.8$  Hz, 18H).

$^{13}\text{C NMR}$  (100 MHz,  $\text{CDCl}_3$ )  $\delta$  158.8 (d,  $J = 237.0$  Hz), 138.0, 129.9, 128.0 (d,  $J = 4.6$  Hz), 117.2 (d,  $J = 9.0$  Hz), 111.6 (d,  $J = 25.2$  Hz), 107.1 (t,  $J = 4.5$  Hz), 105.1 (d,  $J = 23.4$  Hz), 38.6 (d,  $J = 69.0$  Hz), 26.7.

$^{31}\text{P NMR}$  (162 MHz,  $\text{CDCl}_3$ )  $\delta$  63.34.

The data is consist with previous literature.<sup>1</sup>

#### Di-tert-butyl(6-chloro-1H-indol-1-yl)phosphine oxide(1f)

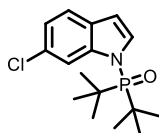

839 mg, 90 % white solid.  $R_f = 0.5$  (Hexane: Acetone = 3:1). (known compound)

$^1\text{H NMR}$  (400 MHz,  $\text{CDCl}_3$ )  $\delta$  8.59 (s, 1H), 7.46 (d,  $J = 8.4$  Hz, 1H), 7.21 (d,  $J = 2.3$  Hz, 1H), 7.14 (dd,  $J = 8.4, 1.4$  Hz, 1H), 6.65 (s, 1H), 1.33 (d,  $J = 14.8$  Hz, 18H).

$^{13}\text{C NMR}$  (100 MHz,  $\text{CDCl}_3$ )  $\delta$  141.9, 129.3, 127.7, 127.0 (d,  $J = 4.7$  Hz), 122.3, 120.8, 116.2, 107.0 (d,  $J = 4.8$  Hz), 38.6 (d,  $J = 68.6$  Hz), 26.6.

$^{31}\text{P NMR}$  (162 MHz,  $\text{CDCl}_3$ )  $\delta$  63.79.

The data is consist with previous literature.<sup>1</sup>

#### Di-tert-butyl(5-methoxy-1H-indol-1-yl)phosphine oxide(1g)

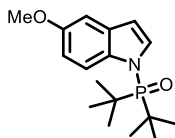

746 mg, 81 % white solid.  $R_f = 0.5$  (Hexane: Acetone = 3:1). (known compound)

$^1\text{H NMR}$  (400 MHz,  $\text{CDCl}_3$ )  $\delta$  8.40 (d,  $J = 9.2$  Hz, 1H), 7.20 (d,  $J = 2.0$  Hz, 1H), 7.02 (d,  $J = 1.9$  Hz, 1H), 6.86 (dd,  $J = 9.2, 2.5$  Hz, 1H), 6.61 (d,  $J = 2.2$  Hz, 1H), 3.82 (s, 3H), 1.32 (d,  $J = 14.7$  Hz, 18H).

$^{13}\text{C NMR}$  (100 MHz,  $\text{CDCl}_3$ )  $\delta$  155.1, 136.5, 129.8, 126.9 (d,  $J = 4.8$  Hz), 117.0, 112.9, 106.9 (d,  $J = 5.1$  Hz), 102.0, 55.6, 38.5 (d,  $J = 69.4$  Hz), 26.7.

$^{31}\text{P NMR}$  (162 MHz,  $\text{CDCl}_3$ )  $\delta$  62.46.

The data is consist with previous literature.<sup>1</sup>

#### Di-tert-butyl(6-methoxy-1H-indol-1-yl)phosphine oxide(1h)

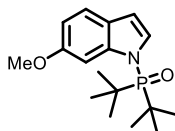

773 mg, 84 % white solid. Rf = 0.5 (Hexane: Acetone = 3:1). (known compound)  
**<sup>1</sup>H NMR** (400 MHz, CDCl<sub>3</sub>) δ 8.14 (s, 1H), 7.42 (d, *J* = 8.6 Hz, 1H), 7.12 (d, *J* = 2.7 Hz, 1H), 6.83 (dd, *J* = 8.6, 2.1 Hz, 1H), 6.60 (s, 1H), 3.86 (s, 3H), 1.35 (d, *J* = 14.7 Hz, 18H).

**<sup>13</sup>C NMR** (100 MHz, CDCl<sub>3</sub>) δ 156.9, 142.6, 125.1 (d, *J* = 4.8 Hz), 123.1 (d, *J* = 5.6 Hz), 120.4, 112.1, 106.9 (d, *J* = 15.3 Hz), 98.9 (d, *J* = 8.6 Hz), 55.5, 38.6 (d, *J* = 69.2 Hz), 26.7.

**<sup>31</sup>P NMR** (162 MHz, CDCl<sub>3</sub>) δ 63.05.

The data is consist with previous literature.<sup>1</sup>

#### Di-*tert*-butyl(5-(*p*-tolyl)-1*H*-indol-1-yl)phosphine oxide(1i)

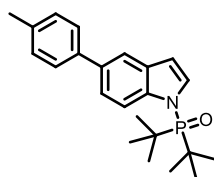

880 mg, 80 % white solid. Rf = 0.5 (Hexane: Acetone = 3:1). (known compound)

**<sup>1</sup>H NMR** (400 MHz, CDCl<sub>3</sub>) δ 8.56 (d, *J* = 8.8 Hz, 1H), 7.77 (s, 1H), 7.55 (d, *J* = 8.1 Hz, 1H), 7.47 (dd, *J* = 8.8, 1.8 Hz, 1H), 7.24 (d, *J* = 8.2 Hz, 1H), 6.77 – 6.68 (m, 1H), 2.40 (s, 1H), 1.36 (d, *J* = 14.7 Hz, 1H).

**<sup>13</sup>C NMR** (100 MHz, CDCl<sub>3</sub>) δ 141.0, 139.1, 136.1, 134.8, 129.7 (d, *J* = 5.4 Hz), 129.3, 127.1, 126.9 (d, *J* = 4.8 Hz), 123.1, 118.3, 116.4, 107.4 (d, *J* = 5.0 Hz), 38.6 (d, *J* = 69.1 Hz), 26.7, 21.1.

**<sup>31</sup>P NMR** (162 MHz, CDCl<sub>3</sub>) δ 62.87.

The data is consist with previous literature.<sup>1</sup>

#### Di-*tert*-butyl(5-(4-methoxyphenyl)-1*H*-indol-1-yl)phosphine oxide(1j)

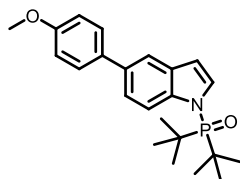

930 mg, 81 % white solid. Rf = 0.5 (Hexane: Acetone = 3:1). (known compound)

**<sup>1</sup>H NMR** (400 MHz, CDCl<sub>3</sub>) δ 8.55 (d, *J* = 8.8 Hz, 1H), 7.73 (s, 1H), 7.60 – 7.50 (m, 2H), 7.44 (dd, *J* = 8.8, 1.9 Hz, 1H), 7.02 – 6.92 (m, 2H), 6.76 – 6.67 (m, 1H), 3.85 (s, 3H), 1.36 (d, *J* = 14.7 Hz, 18H).

**<sup>13</sup>C NMR** (100 MHz, CDCl<sub>3</sub>) δ 158.6, 140.8, 134.6 (d, *J* = 9.2 Hz), 129.7 (d, *J* = 5.5 Hz), 128.3, 126.9 (d, *J* = 4.5 Hz), 122.9, 118.0, 116.4, 114.1, 107.3 (d, *J* = 5.0 Hz), 55.3, 38.6 (d, *J* = 69.3 Hz), 26.7.

**<sup>31</sup>P NMR** (162 MHz, CDCl<sub>3</sub>) δ 62.83.

The data is consist with previous literature.<sup>1</sup>

#### Di-*tert*-butyl(6-(*p*-tolyl)-1*H*-indol-1-yl)phosphine oxide(1k)

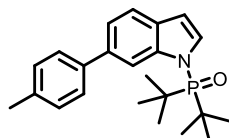

836 mg, 76 % white solid. Rf = 0.5 (Hexane: Acetone = 3:1). (known compound)

**<sup>1</sup>H NMR** (400 MHz, CDCl<sub>3</sub>) δ 8.88 (s, 1H), 7.65 (dd, *J* = 8.2, 1.9 Hz, 3H), 7.50 (dd, *J* = 8.2, 1.6 Hz, 1H), 7.28 (dd, *J* = 3.5, 1.5 Hz, 1H), 7.25 (d, *J* = 7.9 Hz, 2H), 6.76 – 6.66 (m, 1H), 2.41 (s, 3H), 1.39 (d, *J* = 14.8 Hz, 18H).

**<sup>13</sup>C NMR** (100 MHz, CDCl<sub>3</sub>) δ 142.4, 139.0, 136.5, 136.3, 129.3, 128.3 (d, *J* = 5.3 Hz), 127.3, 126.8 (d, *J* = 4.7 Hz), 120.9, 120.2, 114.5, 106.9 (d, *J* = 5.1 Hz), 38.7 (d, *J* = 69.0 Hz), 26.7, 21.1.

**<sup>31</sup>P NMR** (162 MHz, CDCl<sub>3</sub>) δ 62.97.

The data is consist with previous literature.<sup>1</sup>

### Di-tert-butyl(6-(4-methoxyphenyl)-1H-indol-1-yl)phosphine oxide (11)

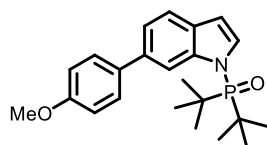

869 mg, 78 % white solid. Rf = 0.5 (Hexane: Acetone = 3:1). (known compound)

**<sup>1</sup>H NMR** (400 MHz, CDCl<sub>3</sub>) δ 8.88 – 8.71 (m, 1H), 7.67 – 7.63 (m, 2H), 7.61 (d, *J* = 8.2 Hz, 1H), 7.43 (dd, *J* = 8.2, 1.6 Hz, 1H), 7.24 (dd, *J* = 3.5, 1.4 Hz, 1H), 6.99 – 6.92 (m, 2H), 6.78 – 6.59 (m, 1H), 3.84 (s, 3H), 1.36 (d, *J* = 14.7 Hz, 18H).

**<sup>13</sup>C NMR** (100 MHz, CDCl<sub>3</sub>) δ 158.7, 142.4, 136.2, 134.6, 128.5, 128.1 (d, *J* = 5.2 Hz), 126.7 (d, *J* = 5.0 Hz), 120.8, 120.2, 114.2, 114.0, 106.9 (d, *J* = 4.6 Hz), 55.4, 38.6 (d, *J* = 69.0 Hz), 26.7.

**<sup>31</sup>P NMR** (162 MHz, CDCl<sub>3</sub>) δ 63.10.

The data is consist with previous literature.<sup>1</sup>

### 3. Additional data for optimization of conditions

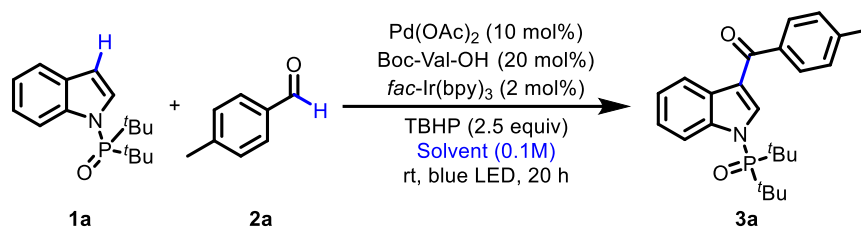

| Entry    | Solvent              | Yield %    |
|----------|----------------------|------------|
| 1        | MeCN                 | 21%        |
| 2        | DMSO                 | NR         |
| 3        | THF                  | NR         |
| 4        | DCE                  | <10%       |
| 5        | EtOH                 | <10%       |
| 6        | Toluene              | NR         |
| 7        | Acetone              | NR         |
| 8        | DMF                  | NR         |
| <b>9</b> | <b>Ethyl acetate</b> | <b>37%</b> |

**Condition:** **1a** (0.1 mmol, 1 equiv), **2a** (0.25 mmol, 2.5 equiv), Pd (PhCN)<sub>2</sub>Cl<sub>2</sub> (10 mol%), *fac*-Ir(ppy)<sub>3</sub> (0.002 mmol, 0.02 equiv), Boc-Val-OH (0.1 mmol, 1 equiv), TBHP (50  $\mu$ L, 2.5M in decane) solvent (1 mL), rt, Ar, 24 h 30 W blue LED. Yields were determined by <sup>1</sup>H NMR spectroscopy with dibromomethane as an internal standard. NR = no reaction.

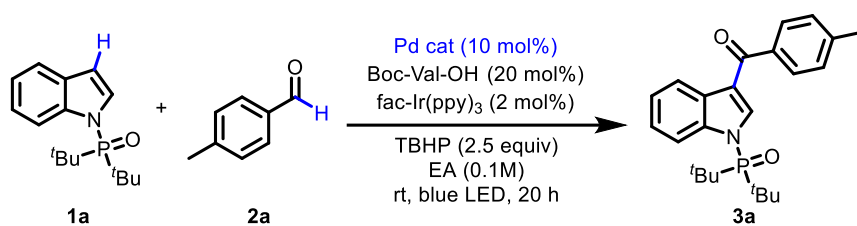

| Entry | Pd cat                                   | Yield %    |
|-------|------------------------------------------|------------|
| 1     | Pd(TFA) <sub>2</sub>                     | 28%        |
| 2     | PdCl <sub>2</sub>                        | 39%        |
| 3     | PdBr <sub>2</sub>                        | 20%        |
| 4     | Pd(MeCN)Cl <sub>2</sub>                  | <10%       |
| 5     | <b>Bis(benzonitrile)PdCl<sub>2</sub></b> | <b>49%</b> |
| 6     | [(Cinnamyl)PdCl] <sub>2</sub>            | NR         |

**Condition:** **1a** (0.1 mmol, 1 equiv), **2a** (0.25 mmol, 2.5 equiv), Pd catalyst (10 mol%), *fac*-Ir(ppy)<sub>3</sub> (0.002 mmol, 0.02 equiv), Boc-Val-OH (0.02 mmol, 0.2 equiv), TBHP (50  $\mu$ L, 2.5M in decane), ethyl acetate (1 mL), rt, Ar, 24 h 30 W blue LED. Yields were determined by <sup>1</sup>H NMR spectroscopy with dibromomethane as an internal standard. NR = no reaction.

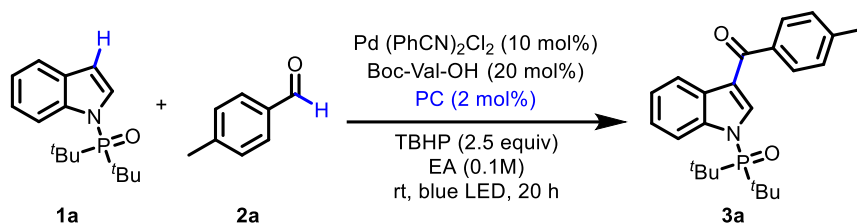

| Entry | PC                                                                | Yield % |
|-------|-------------------------------------------------------------------|---------|
| 7     | Ru(bpy) <sub>3</sub> PF <sub>6</sub>                              | <20%    |
| 8     | [Ir{dF(CF <sub>3</sub> )ppy} <sub>2</sub> (dtbpy)]PF <sub>6</sub> | trace   |
| 9     | Ir[(bpy) <sub>2</sub> (dtbpy)]PF <sub>6</sub>                     | <20%    |

**Condition:** **1a** (0.1 mmol, 1 equiv), **2a** (0.25 mmol, 2.5 equiv), Pd(PhCN)<sub>2</sub>Cl<sub>2</sub> (10 mol%), photocatalyst (0.002 mmol, 0.02 equiv), Boc-Val-OH (0.02 mmol, 0.2 equiv), TBHP (50  $\mu$ L, 2.5M in decane), ethyl acetate (1 mL), rt, Ar, 24 h 30 W blue LED. Yields were determined by <sup>1</sup>H NMR spectroscopy with dibromomethane as an internal standard. NR = no reaction.



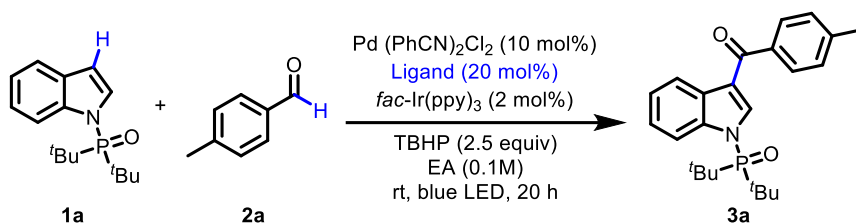

| Entry | Ligand | Yield % |
|-------|--------|---------|
| 1     | L1     | NR      |
| 2     | L2     | NR      |
| 3     | L3     | 70%     |
| 4     | L4     | 80%     |
| 5     | L5     | NR      |
| 6     | L6     | NR      |

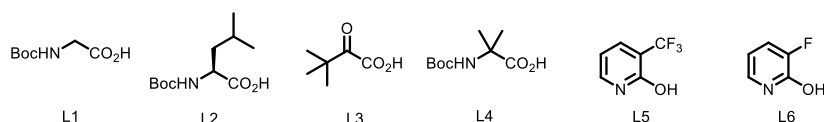

**Condition:** **1a** (0.1 mmol, 1 equiv), **2a** (0.25 mmol, 2.5 equiv), Pd(PhCN)<sub>2</sub>Cl<sub>2</sub> (10 mol%), *fac*-Ir(ppy)<sub>3</sub> (0.002 mmol, 0.02 equiv), ligand (0.02 mmol, 0.2 equiv), TBHP (50 μL, 2.5M in decane), ethyl acetate (1 mL), rt, Ar, 24 h 30 W blue LED. Yields were determined by <sup>1</sup>H NMR spectroscopy with dibromomethane as an internal standard. NR = no reaction.

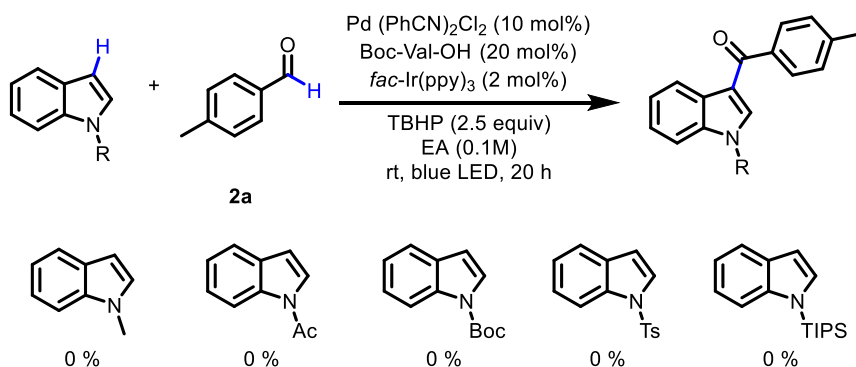

#### 4. General procedure for the synthesis of 3a-3dd

A mixture of *di-tert-butylphosphine oxide indole derivatives* (0.1 mmol), Pd(PhCN)<sub>2</sub>Cl<sub>2</sub> (3.8 mg, 0.01 mmol, 0.1 equiv), *fac*-Ir(ppy)<sub>3</sub> (1.3 mg, 0.002 mmol, 0.02 equiv), Boc-Aib-OH (3.7 mg, 0.02 mmol, 0.2 equiv), dry ethyl acetate (1.0 mL), TBHP (50 μL, 0.25 mmol, 2.5 equiv) and benzaldehyde derivatives (0.25 mmol, 2.5 equiv) in a 4 mL vial, then the vial was purged with Ar for 1 min under stirring. The vial was sealed with PTFE cap. The reaction was stirred and irradiated with a 30 W Blue LEDs (approximately 1 cm away from the light source) at room

temperature for 24 h. The reaction mixture was diluted with 5.0 mL of ethyl acetate and filtered through a plug of celite, followed by washing with 15 mL of ethyl acetate. The combined residue was concentrated under reduced pressure, and then the resulting crude product was purified by column chromatography (eluent: *n*-hexane/Acetone) to provide the product **3a-3dd**.

**(1-(di-tert-butylphosphoryl)-1H-indol-3-yl)(p-tolyl)methanone (3a)**

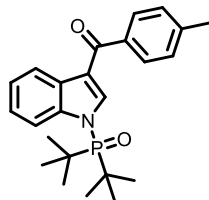

28.5 mg, 73 % white solid. R<sub>f</sub> = 0.5 (Hexane: Acetone = 3:1). M. P. = 119-121 °C

<sup>1</sup>H NMR (400 MHz, CDCl<sub>3</sub>) δ 8.55 – 8.41 (m, 1H), 8.18 (dd, *J* = 6.0, 3.1 Hz, 1H), 7.68 (d, *J* = 8.0 Hz, 2H), 7.60 (d, *J* = 1.8 Hz, 1H), 7.28 – 7.21 (m, 4H), 7.18 (s, 1H), 2.38 (s, 3H), 1.28 (d, *J* = 15.0 Hz, 18H).

<sup>13</sup>C NMR (100 MHz, CDCl<sub>3</sub>) δ 190.9, 142.7, 142.3, 137.3, 134.3 (d, *J* = 4.4 Hz), 129.2, 129.0, 127.2 (d, *J* = 4.4 Hz), 125.1, 123.6, 121.7, 120.2 (d, *J* = 4.1 Hz), 116.4, 38.8 (d, *J* = 67.4 Hz), 26.7, 21.6.

HRMS(ESI-QMA) *m/z*: [M+H]<sup>+</sup> Calcd for C<sub>24</sub>H<sub>31</sub>NO<sub>2</sub>P 396.2087; Found 396.2090.

**(1-(di-tert-butylphosphoryl)-1H-indol-3-yl)(phenyl)methanone (3b)**

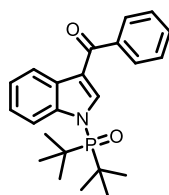

18.0 mg, 47 % white solid. R<sub>f</sub> = 0.5 (Hexane: Acetone = 3:1). M. P. = 83-85 °C

<sup>1</sup>H NMR (400 MHz, CDCl<sub>3</sub>) δ 8.60 – 8.51 (m, 1H), 8.32 – 8.24 (m, 1H), 7.84 (d, *J* = 7.2 Hz, 2H), 7.67 (d, *J* = 1.8 Hz, 1H), 7.60 (t, *J* = 7.3 Hz, 1H), 7.51 (t, *J* = 7.5 Hz, 2H), 7.37 – 7.32 (m, 2H), 1.36 (d, *J* = 15.0 Hz, 18H).

<sup>13</sup>C NMR (100 MHz, CDCl<sub>3</sub>) δ 191.1, 142.4, 140.0, 134.7 (d, *J* = 4.4 Hz), 131.9, 128.8, 128.5, 127.1 (d, *J* = 4.5 Hz), 125.2, 123.7, 121.7, 120.1 (d, *J* = 3.7 Hz), 116.4, 38.8 (d, *J* = 67.4 Hz), 26.7.

<sup>31</sup>P NMR (162 MHz, CDCl<sub>3</sub>) δ 65.29.

HRMS(ESI-QMA) *m/z*: [M+H]<sup>+</sup> Calcd for C<sub>23</sub>H<sub>29</sub>NO<sub>2</sub>P 382.1930; Found 382.1927.

**(1-(di-tert-butylphosphoryl)-1H-indol-3-yl)(m-tolyl)methanone (3c)**

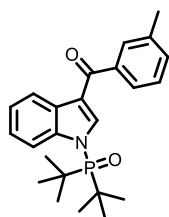

28.4 mg, 72 % white solid. R<sub>f</sub> = 0.5 (Hexane: Acetone = 3:1). M. P. = 110-112 °C

**<sup>1</sup>H NMR** (400 MHz, CDCl<sub>3</sub>) δ 8.64 – 8.47 (m, 1H), 8.35 – 8.20 (m, 1H), 7.67 (d, *J* = 2.0 Hz, 2H), 7.62 (d, *J* = 6.3 Hz, 1H), 7.39 (d, *J* = 6.2 Hz, 2H), 7.37 – 7.31 (m, 2H), 2.43 (s, 3H), 1.35 (d, *J* = 15.0 Hz, 18H).

**<sup>13</sup>C NMR** (100 MHz, CDCl<sub>3</sub>) δ 191.3, 142.3, 139.9, 138.3, 134.7 (d, *J* = 4.9 Hz), 132.7, 129.6, 128.3, 127.2 (d, *J* = 4.3 Hz), 126.0, 125.1, 123.7, 121.7, 120.1 (d, *J* = 4.1 Hz), 116.4, 38.8 (d, *J* = 67.4 Hz), 26.7, 21.4.

**<sup>31</sup>P NMR** (162 MHz, CDCl<sub>3</sub>) δ 65.31.

**HRMS**(ESI-QMA) *m/z*: [M+H]<sup>+</sup> Calcd for C<sub>24</sub>H<sub>31</sub>NO<sub>2</sub>P 396.2087; Found 396.2087.

**(1-(di-tert-butylphosphoryl)-1H-indol-3-yl)(4-isopropylphenyl)methanone (3d)**

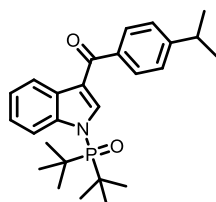

32.1 mg, 76 % white solid. R<sub>f</sub> = 0.5 (Hexane: Acetone = 3:1). M. P. = 105-107 °C

**<sup>1</sup>H NMR** (400 MHz, CDCl<sub>3</sub>) δ 8.63 – 8.49 (m, 1H), 8.34 – 8.21 (m, 1H), 7.81 (d, *J* = 8.1 Hz, 2H), 7.70 (d, *J* = 1.7 Hz, 1H), 7.38 (s, 1H), 7.36 – 7.30 (m, 3H), 3.14 – 2.89 (m, 1H), 1.37 (d, *J* = 15.0 Hz, 18H), 1.31 (d, *J* = 6.9 Hz, 6H).

**<sup>13</sup>C NMR** (100 MHz, CDCl<sub>3</sub>) δ 190.7, 153.5, 142.3, 137.5, 134.2 (d, *J* = 4.4 Hz), 129.2, 127.3 (d, *J* = 4.3 Hz), 126.6, 125.0, 123.6, 121.7, 120.1 (d, *J* = 4.1 Hz), 116.4, 38.8 (d, *J* = 67.3 Hz), 34.2, 26.7, 23.8.

**<sup>31</sup>P NMR** (162 MHz, CDCl<sub>3</sub>) δ 65.20.

**HRMS**(ESI-QMA) *m/z*: [M+H]<sup>+</sup> Calcd for C<sub>26</sub>H<sub>35</sub>NO<sub>2</sub>P 424.2400; Found 424.2401.

**(1-(di-tert-butylphosphoryl)-1H-indol-3-yl)(3,4-dichlorophenyl)methanone (3e)**

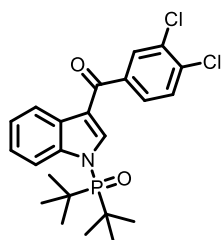

28.3 mg, 63 % white solid. R<sub>f</sub> = 0.5 (Hexane: Acetone = 3:1). M. P. = 99-101 °C

**<sup>1</sup>H NMR** (400 MHz, CDCl<sub>3</sub>) δ 8.59 – 8.53 (m, 1H), 8.27 – 8.22 (m, 1H), 7.93 (d, *J* = 1.9 Hz, 1H), 7.71 – 7.64 (m, 2H), 7.61 (d, *J* = 8.2 Hz, 1H), 7.38 – 7.34 (m, 2H), 1.37 (d, *J* = 15.0 Hz, 18H).

**<sup>13</sup>C NMR** (100 MHz, CDCl<sub>3</sub>) δ 188.3, 142.5, 139.6, 136.6, 134.8 (d, *J* = 4.1 Hz), 133.1, 131.1, 130.8, 128.0, 126.9 (d, *J* = 4.3 Hz), 125.6, 124.1, 121.6, 119.5 (d, *J* = 3.9 Hz), 116.7, 39.0 (d, *J* = 67.1 Hz), 26.8.

**<sup>31</sup>P NMR** (162 MHz, CDCl<sub>3</sub>) δ 65.70.

**HRMS**(ESI-QMA) *m/z*: [M+H]<sup>+</sup> Calcd for C<sub>23</sub>H<sub>27</sub>Cl<sub>2</sub>NO<sub>2</sub>P 450.1151; Found 450.1153.

**(4-bromophenyl)(1-(di-tert-butylphosphoryl)-1H-indol-3-yl)methanone(3f)**

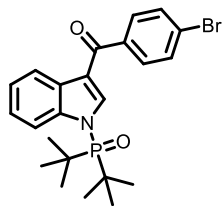

18.8 mg, 41 % white solid. R<sub>f</sub> = 0.5 (Hexane: Acetone = 3:1). M. P. = 176-178 °C

<sup>1</sup>H NMR (400 MHz, CDCl<sub>3</sub>) δ 8.59 – 8.53 (m, 1H), 8.26 – 8.20 (m, 1H), 7.71 (d, *J* = 8.5 Hz, 2H), 7.65 (d, *J* = 8.7 Hz, 3H), 7.37 – 7.32 (m, 2H), 1.36 (d, *J* = 15.0 Hz, 18H).

<sup>13</sup>C NMR (100 MHz, CDCl<sub>3</sub>) δ 189.8, 142.4, 138.7, 134.5 (d, *J* = 4.1 Hz), 131.8, 130.4, 126.9 (d, *J* = 4.2 Hz), 126.8, 125.3, 123.8, 121.6, 119.8 (d, *J* = 4.2 Hz), 116.5, 38.8 (d, *J* = 67.2 Hz), 26.7.

<sup>31</sup>P NMR (162 MHz, CDCl<sub>3</sub>) δ 65.48.

HRMS(ESI-QMA) m/z: [M+H]<sup>+</sup> Calcd for C<sub>23</sub>H<sub>28</sub>BrNO<sub>2</sub>P 460.1036; Found 460.1037.

### methyl 3-(1-(di-tert-butylphosphoryl)-1H-indole-3-carbonyl)benzoate (3g)

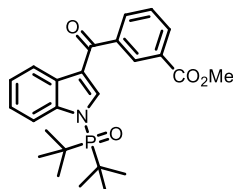

30.2 mg, 69 % white solid. R<sub>f</sub> = 0.5 (Hexane: Acetone = 3:1). M. P. = 117-119 °C

<sup>1</sup>H NMR (400 MHz, CDCl<sub>3</sub>) δ 8.59 (d, *J* = 7.9 Hz, 1H), 8.30 (s, 1H), 8.02 (d, *J* = 7.8 Hz, 1H), 7.82 (t, *J* = 7.3 Hz, 2H), 7.55 (t, *J* = 7.7 Hz, 1H), 7.37 (d, *J* = 1.3 Hz, 1H), 7.33 – 7.24 (m, 2H), 3.96 (s, 3H), 1.40 (d, *J* = 14.8 Hz, 18H).

<sup>13</sup>C NMR (100 MHz, CDCl<sub>3</sub>) δ 167.2, 151.1, 142.6, 134.7, 132.5, 130.9, 129.0, 128.9, 128.0, 127.4 (d, *J* = 4.7 Hz), 124.2, 123.8 (d, *J* = 4.8 Hz), 122.3, 121.6 (d, *J* = 4.8 Hz), 119.1, 116.7, 52.4, 38.8 (d, *J* = 68.6 Hz), 26.8.

<sup>31</sup>P NMR (162 MHz, CDCl<sub>3</sub>) δ 64.02.

HRMS(ESI-QMA) m/z: [M+H]<sup>+</sup> Calcd for C<sub>25</sub>H<sub>31</sub>BrNO<sub>4</sub>P 440.1985; Found 440.1986.

### methyl 4-(1-(di-tert-butylphosphoryl)-1H-indole-3-carbonyl)benzoate (3h)

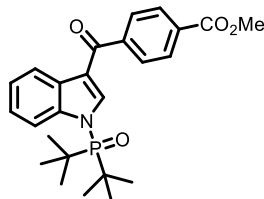

28.0 mg, 64 % white solid. R<sub>f</sub> = 0.5 (Hexane: Acetone = 3:1). M. P. = 122-124 °C

<sup>1</sup>H NMR (400 MHz, CDCl<sub>3</sub>) δ 8.65 – 8.47 (m, 1H), 8.32 – 8.22 (m, 1H), 8.18 (d, *J* = 8.4 Hz, 2H), 7.87 (d, *J* = 8.4 Hz, 2H), 7.64 (d, *J* = 2.1 Hz, 1H), 7.41 – 7.31 (m, 2H), 3.98 (s, 3H), 1.35 (d, *J* = 15.0 Hz, 18H).

<sup>13</sup>C NMR (100 MHz, CDCl<sub>3</sub>) δ 190.3, 166.4, 143.7, 142.4, 135.0 (d, *J* = 4.3 Hz), 132.9, 129.7, 128.6, 126.8 (d, *J* = 4.2 Hz), 125.4, 124.0, 121.7, 119.9 (d, *J* = 4.2 Hz), 116.5, 52.5, 38.8 (d, *J* = 66.8 Hz), 26.7.

<sup>31</sup>P NMR (162 MHz, CDCl<sub>3</sub>) δ 65.89.

HRMS(ESI-QMA) m/z: [M+H]<sup>+</sup> Calcd for C<sub>25</sub>H<sub>31</sub>BrNO<sub>4</sub>P 440.1985; Found 440.1988.

**1-(4-(1-(di-tert-butylphosphoryl)-1H-indole-3-carbonyl)phenyl)ethan-1-one(3i)**

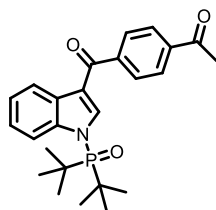

27.4 mg, 65 % white solid. R<sub>f</sub> = 0.5 (Hexane: Acetone = 3:1). M. P. = 195-197 °C

**<sup>1</sup>H NMR** (400 MHz, CDCl<sub>3</sub>) δ 8.62 (d, *J* = 7.8 Hz, 1H), 8.07 (d, *J* = 8.2 Hz, 2H), 7.85 (d, *J* = 7.6 Hz, 1H), 7.74 (d, *J* = 8.2 Hz, 2H), 7.42 (d, *J* = 1.2 Hz, 1H), 7.33 – 7.23 (m, 2H), 2.65 (s, 3H), 1.39 (d, *J* = 14.8 Hz, 18H).

**<sup>13</sup>C NMR** (100 MHz, CDCl<sub>3</sub>) δ 197.5, 197.4, 142.7, 139.5, 135.4, 129.1, 127.7, 126.9 (d, *J* = 5.0 Hz), 124.4 (d, *J* = 4.5 Hz), 124.2, 122.4, 121.2 (d, *J* = 4.9 Hz), 119.0, 116.8, 38.7 (d, *J* = 68.6 Hz), 26.8, 26.6.

**<sup>31</sup>P NMR** (162 MHz, CDCl<sub>3</sub>) δ 63.79.

**HRMS**(ESI-QMA) *m/z*: [M+H]<sup>+</sup> Calcd for C<sub>25</sub>H<sub>31</sub>NO<sub>3</sub>P 424.2036; Found 424.2038.

**(1-(di-tert-butylphosphoryl)-1H-indol-3-yl)(3-(trifluoromethyl)phenyl) methanone (3j)**

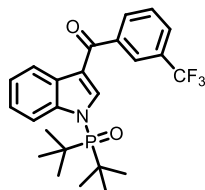

23.3 mg, 52 % yellow oil. R<sub>f</sub> = 0.5 (Hexane: Acetone = 3:1).

**<sup>1</sup>H NMR** (400 MHz, CDCl<sub>3</sub>) δ 8.59 – 8.55 (m, 1H), 8.33 – 8.29 (m, 1H), 8.08 (d, *J* = 6.5 Hz, 2H), 7.86 (d, *J* = 7.8 Hz, 1H), 7.68 (t, *J* = 8.0 Hz, 1H), 7.64 (d, *J* = 2.1 Hz, 1H), 7.41 – 7.34 (m, 2H), 1.38 (s, 9H), 1.34 (s, 9H).

**<sup>13</sup>C NMR** (100 MHz, CDCl<sub>3</sub>) δ 189.2, 142.4, 140.5, 134.9 (d, *J* = 4.3 Hz), 132.1, 130.7 (q, *J* = 33.1 Hz), 129.5, 128.4 (q, *J* = 3.3 Hz), 126.9 (d, *J* = 4.3 Hz), 125.7 (q, *J* = 3.4 Hz), 125.5, 124.0, 123.5 (q, *J* = 228.8 Hz), 121.6, 119.4 (d, *J* = 3.9 Hz), 116.5, 38.8 (d, *J* = 66.9 Hz), 26.6.

**<sup>31</sup>P NMR** (162 MHz, CDCl<sub>3</sub>) δ 65.76.

**<sup>19</sup>F NMR** (376 MHz, CDCl<sub>3</sub>) δ -62.68.

**HRMS**(ESI-QMA) *m/z*: [M+H]<sup>+</sup> Calcd for C<sub>24</sub>H<sub>28</sub>F<sub>3</sub>NO<sub>2</sub>P 450.1804; Found 450.1809.

**(1-(di-tert-butylphosphoryl)-1H-indol-3-yl)(4-(trifluoromethyl)phenyl) methanone (3k)**

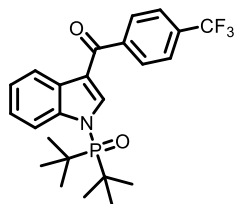

25.5 mg, 57 % white solid. R<sub>f</sub> = 0.5 (Hexane: Acetone = 3:1). M. P. = 149-151 °C

**<sup>1</sup>H NMR** (400 MHz, CDCl<sub>3</sub>) δ 8.59 – 8.53 (m, 1H), 8.25 – 8.20 (m, 1H), 7.91 (d, *J* = 8.0 Hz, 2H), 7.76 (d, *J* = 8.2 Hz, 2H), 7.63 (d, *J* = 2.1 Hz, 1H), 7.34 (dd, *J* = 6.2, 3.3 Hz, 1H), 1.34 (d, *J* = 15.0

Hz, 18H).

$^{13}\text{C}$  NMR (100 MHz,  $\text{CDCl}_3$ )  $\delta$  189.8, 143.2, 142.6, 135.0 (d,  $J = 4.3$  Hz), 133.5 (d,  $J = 32.7$  Hz), 129.1, 126.9 (q,  $J = 4.3$  Hz), 125.7 (q,  $J = 7.2, 3.5$  Hz), 125.6, 124.1, 123.8 (q,  $J = 272.8$  Hz), 121.7, 119.8 (d,  $J = 4.1$  Hz), 116.7, 38.9 (d,  $J = 67.0$  Hz), 26.8.

$^{31}\text{P}$  NMR (162 MHz,  $\text{CDCl}_3$ )  $\delta$  65.66.

$^{19}\text{F}$  NMR (376 MHz,  $\text{CDCl}_3$ )  $\delta$  -62.83.

HRMS(ESI-QMA) m/z:  $[\text{M}+\text{H}]^+$  Calcd for  $\text{C}_{24}\text{H}_{28}\text{F}_3\text{NO}_2\text{P}$  450.1804; Found 450.1806.

#### (1-(di-tert-butylphosphoryl)-1H-indol-3-yl)(4-((trifluoromethyl)thio)phenyl) methanone (3l)

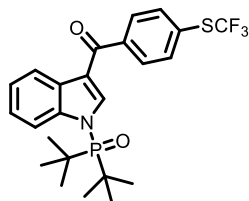

35.1 mg, 73 % white solid. Rf = 0.5 (Hexane: Acetone = 3:1). M. P. = 108-110 °C

$^1\text{H}$  NMR (400 MHz,  $\text{CDCl}_3$ )  $\delta$  8.61 – 8.52 (m, 1H), 8.28 – 8.21 (m, 1H), 7.85 (d,  $J = 8.3$  Hz, 2H), 7.79 (d,  $J = 8.3$  Hz, 2H), 7.63 (d,  $J = 2.1$  Hz, 1H), 7.38 – 7.33 (m, 2H), 1.35 (d,  $J = 15.0$  Hz, 18H).

$^{13}\text{C}$  NMR (100 MHz,  $\text{CDCl}_3$ )  $\delta$  189.8, 142.4, 141.9, 135.9, 135.8, 134.9 (d,  $J = 4.2$  Hz), 129.7 (q,  $J = 234.1$  Hz), 126.8 (d,  $J = 4.2$  Hz), 126.4, 125.5, 124.0, 121.6, 119.8 (d,  $J = 4.0$  Hz), 116.5, 38.8 (d,  $J = 67.0$  Hz), 26.7.

$^{31}\text{P}$  NMR (162 MHz,  $\text{CDCl}_3$ )  $\delta$  65.71.

$^{19}\text{F}$  NMR (376 MHz,  $\text{CDCl}_3$ )  $\delta$  -41.91.

HRMS(ESI-QMA) m/z:  $[\text{M}+\text{H}]^+$  Calcd for  $\text{C}_{24}\text{H}_{28}\text{F}_3\text{NO}_2\text{PS}$  482.1525; Found 482.1526.

#### 4-(1-(di-tert-butylphosphoryl)-1H-indole-3-carbonyl)benzonitrile (3m)

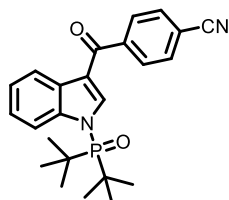

16.6 mg, 41 % white solid. Rf = 0.5 (Hexane: Acetone = 3:1). M. P. = 109-111 °C

$^1\text{H}$  NMR (400 MHz,  $\text{CDCl}_3$ )  $\delta$  8.61 – 8.55 (m, 1H), 8.26 – 8.18 (m, 1H), 7.90 (d,  $J = 8.1$  Hz, 2H), 7.82 (d,  $J = 8.3$  Hz, 2H), 7.62 (d,  $J = 1.8$  Hz, 1H), 7.36 (dd,  $J = 6.2, 3.2$  Hz, 2H), 1.35 (d,  $J = 15.0$  Hz, 18H).

$^{13}\text{C}$  NMR (100 MHz,  $\text{CDCl}_3$ )  $\delta$  182.9, 142.7, 139.4, 132.7, 128.1, 126.7 (d,  $J = 4.5$  Hz), 124.6 (d,  $J = 4.5$  Hz), 124.4, 122.53, 120.6 (d,  $J = 4.4$  Hz), 119.0, 118.7, 116.9, 110.2, 38.8 (d,  $J = 68.5$  Hz), 26.8.

$^{31}\text{P}$  NMR (162 MHz,  $\text{CDCl}_3$ )  $\delta$  64.00.

HRMS(ESI-QMA) m/z:  $[\text{M}+\text{H}]^+$  Calcd for  $\text{C}_{24}\text{H}_{28}\text{N}_2\text{O}_2\text{P}$  407.1883; Found 407.1886.

#### (1-(di-tert-butylphosphoryl)-1H-indol-3-yl)(4-(methylsulfonyl)phenyl)methanone (3n)

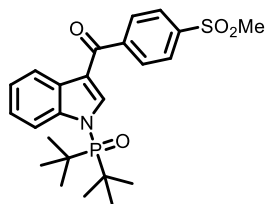

18.4 mg, 40 % white solid. R<sub>f</sub> = 0.5 (Hexane: Acetone = 3:1). M. P. = 196-198 °C

**<sup>1</sup>H NMR** (400 MHz, CDCl<sub>3</sub>) δ 8.61 – 8.55 (m, 1H), 8.29 – 8.23 (m, 1H), 8.10 (d, *J* = 8.4 Hz, 2H), 7.98 (d, *J* = 8.4 Hz, 2H), 7.62 (d, *J* = 2.1 Hz, 1H), 7.37 (dd, *J* = 6.1, 3.3 Hz, 2H), 3.13 (s, 3H), 1.35 (d, *J* = 15.0 Hz, 18H).

**<sup>13</sup>C NMR** (100 MHz, CDCl<sub>3</sub>) δ 189.3, 144.7, 143.2, 142.5, 135.1 (d, *J* = 4.3 Hz), 129.4, 127.7, 126.6 (d, *J* = 4.3 Hz), 125.6, 124.2, 121.6, 119.6 (d, *J* = 3.9 Hz), 116.7, 44.4, 38.9 (d, *J* = 66.9 Hz), 26.7.

**<sup>31</sup>P NMR** (162 MHz, CDCl<sub>3</sub>) δ 65.97.

**HRMS**(ESI-QMA) *m/z*: [M+H]<sup>+</sup> Calcd for C<sub>24</sub>H<sub>31</sub>NO<sub>4</sub>PS 460.1706; Found 460.1708.

**(4-(chloromethyl)phenyl)(1-(di-tert-butylphosphoryl)-1H-indol-3-yl)methanone (3o)**

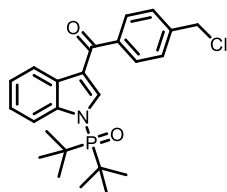

25.3 mg, 59 % white solid. R<sub>f</sub> = 0.5 (Hexane: Acetone = 3:1). M. P. = 108-110 °C

**<sup>1</sup>H NMR** (400 MHz, CDCl<sub>3</sub>) δ 8.59 – 8.54 (m, 1H), 8.29 – 8.21 (m, 1H), 7.83 (d, *J* = 8.2 Hz, 2H), 7.67 (d, *J* = 2.1 Hz, 1H), 7.53 (d, *J* = 8.2 Hz, 2H), 7.38 – 7.31 (m, 2H), 4.66 (s, 2H), 1.36 (d, *J* = 15.0 Hz, 18H).

**<sup>13</sup>C NMR** (100 MHz, CDCl<sub>3</sub>) δ 190.4, 142.3, 141.3, 139.8, 134.6 (d, *J* = 4.3 Hz), 129.3, 128.6, 127.0 (d, *J* = 4.4 Hz), 125.3, 123.8, 121.7, 119.9 (d, *J* = 4.0 Hz), 116.5, 45.5, 38.8 (d, *J* = 67.2 Hz), 26.7.

**<sup>31</sup>P NMR** (162 MHz, CDCl<sub>3</sub>) δ 65.67.

**HRMS**(ESI-QMA) *m/z*: [M+H]<sup>+</sup> Calcd for C<sub>24</sub>H<sub>30</sub>ClNO<sub>2</sub>P 430.1697; Found 430.1697.

**Methyl 2-(4-(1-(di-tert-butylphosphoryl)-1H-indole-3-carbonyl)phenyl)acetate (3p)**

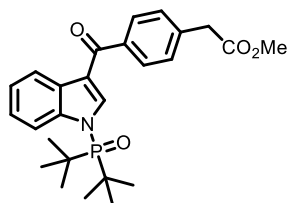

24.0 mg, 53 % yellow oil. R<sub>f</sub> = 0.4 (Hexane: Acetone = 3:1).

**<sup>1</sup>H NMR** (400 MHz, CDCl<sub>3</sub>) δ 8.55 – 8.51 (m, 1H), 8.27 – 8.22 (m, 1H), 7.79 (d, *J* = 8.1 Hz, 2H), 7.66 (d, *J* = 2.0 Hz, 1H), 7.40 (d, *J* = 8.1 Hz, 2H), 7.35 – 7.28 (m, 2H), 3.71 (s, 3H), 3.70 – 3.66 (m, 2H), 1.33 (d, *J* = 15.0 Hz, 18H).

**<sup>13</sup>C NMR** (100 MHz, CDCl<sub>3</sub>) δ 190.5, 171.4, 142.3, 138.7, 138.2, 134.4 (d, *J* = 4.4 Hz), 134.4, 129.5, 129.2, 127.2 (d, *J* = 4.2 Hz), 125.2, 123.7, 121.7, 120.0 (d, *J* = 4.2 Hz), 116.4, 52.2, 41.0, 38.8 (d, *J* = 67.3 Hz), 26.7.

**<sup>31</sup>P NMR** (162 MHz, CDCl<sub>3</sub>) δ 65.50.

**HRMS(ESI-QMA) m/z:** [M+H]<sup>+</sup> Calcd for C<sub>26</sub>H<sub>33</sub>NO<sub>4</sub>P 454.2142; Found 454.2141.

**4-(1-(di-tert-butylphosphoryl)-1H-indole-3-carbonyl)benzyl acetate (3q)**

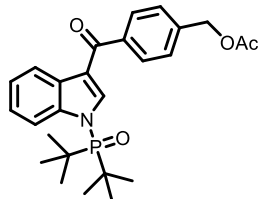

28.1 mg, 62 % yellow oil. R<sub>f</sub> = 0.5 (Hexane: Acetone = 3:1).

**<sup>1</sup>H NMR** (400 MHz, CDCl<sub>3</sub>) δ 8.59 (d, *J* = 8.0 Hz, 1H), 7.82 (d, *J* = 7.8 Hz, 1H), 7.64 (d, *J* = 8.1 Hz, 2H), 7.48 (d, *J* = 8.1 Hz, 2H), 7.33 (d, *J* = 1.4 Hz, 1H), 7.32 – 7.27 (m, 1H), 7.26 – 7.22 (m, 1H), 5.17 (s, 2H), 2.13 (s, 3H), 1.39 (d, *J* = 14.8 Hz, 18H).

**<sup>13</sup>C NMR** (100 MHz, CDCl<sub>3</sub>) δ 171.0, 168.3, 142.6, 134.7, 134.6, 129.1, 128.2, 127.5 (d, *J* = 5.0 Hz), 124.1, 123.8 (d, *J* = 4.7 Hz), 122.2, 121.9 (d, *J* = 4.8 Hz), 119.2, 116.7, 66.3, 38.8 (d, *J* = 68.8 Hz), 26.8, 21.2.

**<sup>31</sup>P NMR** (162 MHz, CDCl<sub>3</sub>) δ 63.67.

**HRMS(ESI-QMA) m/z:** [M+H]<sup>+</sup> Calcd for C<sub>26</sub>H<sub>33</sub>NO<sub>4</sub>P 454.2142; Found 454.2148.

**4-(1-(di-tert-butylphosphoryl)-1H-indole-3-carbonyl)benzyl 2-(4-isobutylphenyl) propanoate (3r)**

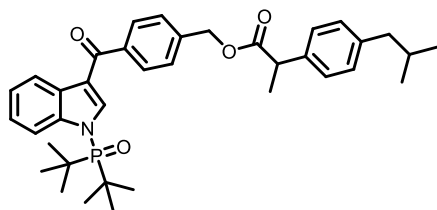

25.8 mg, 43 % yellow oil. R<sub>f</sub> = 0.5 (Hexane: Acetone = 3:1). M. P. = 149-152 °C

**<sup>1</sup>H NMR** (400 MHz, CDCl<sub>3</sub>) δ 8.60 – 8.53 (m, 1H), 8.30 – 8.22 (m, 1H), 7.77 (d, *J* = 8.1 Hz, 2H), 7.65 (d, *J* = 2.0 Hz, 1H), 7.38 – 7.30 (m, 4H), 7.22 (d, *J* = 8.0 Hz, 2H), 7.10 (d, *J* = 8.0 Hz, 2H), 5.21 (s, 2H), 3.80 (q, *J* = 7.1 Hz, 1H), 2.45 (d, *J* = 7.2 Hz, 2H), 1.90 – 1.78 (m, 1H), 1.54 (d, *J* = 7.2 Hz, 3H), 1.36 (d, *J* = 15.0 Hz, 18H), 0.89 (d, *J* = 6.6 Hz, 6H).

**<sup>13</sup>C NMR** (100 MHz, CDCl<sub>3</sub>) δ 190.6, 174.5, 142.4, 140.8, 140.3, 139.5, 137.4, 134.5 (d, *J* = 4.3 Hz), 129.4, 129.0, 127.3, 127.2, 127.1 (d, *J* = 4.2 Hz), 125.2, 123.8, 121.6, 120.1 (d, *J* = 3.8 Hz), 116.4, 65.5, 45.2, 45.0, 38.8 (d, *J* = 67.3 Hz), 30.2, 28.3, 26.7, 22.4, 18.4.

**<sup>31</sup>P NMR** (162 MHz, CDCl<sub>3</sub>) δ 65.55.

**HRMS(ESI-QMA) m/z:** [M+H]<sup>+</sup> Calcd for C<sub>37</sub>H<sub>47</sub>NO<sub>4</sub>P 600.3237; Found 600.3242.

**4-(1-(di-tert-butylphosphoryl)-1H-indole-3-carbonyl)benzyl 5-(2,5-dimethylphenoxy) -2,2-dimethylpentanoate (3s)**

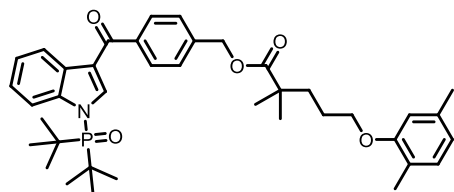



25.0 mg, 39 % yellow oil. Rf = 0.5 (Hexane: Acetone = 3:1). M. P. = 149-152 °C

**<sup>1</sup>H NMR** (400 MHz, CDCl<sub>3</sub>) δ 8.64 – 8.56 (m, 1H), 8.31 – 8.25 (m, 1H), 7.86 (d, *J* = 8.0 Hz, 2H), 7.69 (s, 1H), 7.50 (d, *J* = 7.6 Hz, 2H), 7.39 – 7.35 (m, 2H), 7.01 (d, *J* = 7.3 Hz, 1H), 6.67 (d, *J* = 7.2 Hz, 1H), 6.62 (s, 1H), 5.24 (s, 2H), 3.94 (d, *J* = 5.7 Hz, 2H), 2.32 (s, 3H), 2.18 (s, 3H), 1.80 (s, 4H), 1.37 (d, *J* = 15.0 Hz, 18H), 1.30 (s, 6H).

**<sup>13</sup>C NMR** (100 MHz, CDCl<sub>3</sub>) δ 190.7, 177.6, 157.0, 142.5, 140.6, 139.7, 136.63 134.7 (d, *J* = 4.3 Hz), 130.5, 129.2, 127.6, 127.2 (d, *J* = 4.0 Hz), 125.3, 123.9, 123.6, 121.8, 120.9, 120.2 (d, *J* = 4.0 Hz), 116.6, 112.1, 67.9, 65.5, 42.4, 38.9 (d, *J* = 67.2 Hz), 37.2, 26.8, 25.3, 21.5, 15.9.

**<sup>31</sup>P NMR** (162 MHz, CDCl<sub>3</sub>) δ 65.38.

**HRMS**(ESI-QMA) *m/z*: [M+H]<sup>+</sup> Calcd for C<sub>39</sub>H<sub>51</sub>NO<sub>5</sub>P 644.3499; Found 644.3499.

**(1-(di-tert-butylphosphoryl)-5-methyl-1H-indol-3-yl)(p-tolyl)methanone (3t)**

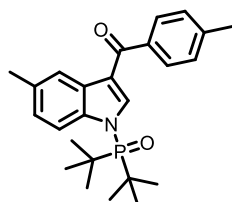

27.4 mg, 67 % white solid. Rf = 0.5 (Hexane: Acetone = 3:1). M. P. = 134-136 °C

**<sup>1</sup>H NMR** (400 MHz, CDCl<sub>3</sub>) δ 8.42 (d, *J* = 8.7 Hz, 1H), 8.10 (s, 1H), 7.75 (d, *J* = 8.0 Hz, 2H), 7.62 (d, *J* = 1.8 Hz, 1H), 7.30 (d, *J* = 8.0 Hz, 2H), 7.16 (d, *J* = 8.4 Hz, 1H), 2.47 (s, 3H), 2.45 (s, 3H), 1.35 (d, *J* = 14.9 Hz, 18H).

**<sup>13</sup>C NMR** (100 MHz, CDCl<sub>3</sub>) δ 190.9, 142.6, 140.5, 137.6, 134.4 (d, *J* = 4.7 Hz), 133.3, 129.1, 129.0, 127.4 (d, *J* = 4.5 Hz), 126.6, 121.4, 119.8 (d, *J* = 3.9 Hz), 115.9, 38.8 (d, *J* = 67.5 Hz), 26.7, 21.6, 21.4.

**<sup>31</sup>P NMR** (162 MHz, CDCl<sub>3</sub>) δ 64.90.

**HRMS**(ESI-QMA) *m/z*: [M+H]<sup>+</sup> Calcd for C<sub>25</sub>H<sub>33</sub>NO<sub>2</sub>P 410.2243; Found 410.2242.

**(1-(di-tert-butylphosphoryl)-6-methyl-1H-indol-3-yl)(p-tolyl)methanone (3u)**

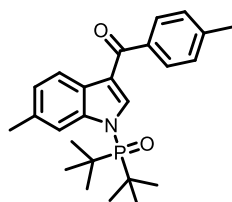

29.8 mg, 73 % white solid. Rf = 0.5 (Hexane: Acetone = 3:1). M. P. = 199-201 °C

**<sup>1</sup>H NMR** (400 MHz, CDCl<sub>3</sub>) δ 8.36 (s, 1H), 8.12 (d, *J* = 8.1 Hz, 1H), 7.74 (d, *J* = 8.1 Hz, 2H), 7.60 (d, *J* = 2.1 Hz, 1H), 7.29 (d, *J* = 7.9 Hz, 2H), 7.16 (dd, *J* = 8.1, 0.9 Hz, 1H), 2.47 (s, 3H), 2.44 (s, 3H), 1.35 (d, *J* = 15.0 Hz, 18H).

**<sup>13</sup>C NMR** (100 MHz, CDCl<sub>3</sub>) δ 190.9, 142.7, 142.6, 137.3, 135.1, 133.8 (d, *J* = 4.6 Hz), 129.1, 129.0, 125.3, 124.9 (d, *J* = 4.4 Hz), 121.2, 120.2 (d, *J* = 4.1 Hz), 116.1, 38.8 (d, *J* = 67.5 Hz), 26.7, 22.0, 21.6.

**<sup>31</sup>P NMR** (162 MHz, CDCl<sub>3</sub>) δ 65.26.

**HRMS**(ESI-QMA) *m/z*: [M+H]<sup>+</sup> Calcd for C<sub>25</sub>H<sub>33</sub>NO<sub>2</sub>P 410.2243; Found 410.2244.

**(1-(di-tert-butylphosphoryl)-7-methyl-1H-indol-3-yl)(p-tolyl)methanone (3v)**

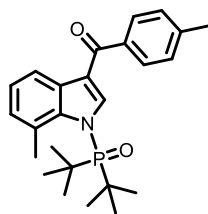

18.8 mg, 46 % white solid. Rf = 0.5 (Hexane: Acetone = 3:1). M. P. = 168-170 °C

**<sup>1</sup>H NMR** (400 MHz, CDCl<sub>3</sub>) δ 8.23 (d, *J* = 7.6 Hz, 1H), 7.79 (d, *J* = 3.6 Hz, 1H), 7.74 (d, *J* = 7.9 Hz, 2H), 7.30 (d, *J* = 7.6 Hz, 2H), 7.27 (s, 1H), 7.22 (d, *J* = 7.0 Hz, 1H), 2.90 (s, 3H), 2.45 (s, 3H), 1.33 (d, *J* = 14.9 Hz, 18H).

**<sup>13</sup>C NMR** (100 MHz, CDCl<sub>3</sub>) δ 190.8, 142.6, 141.3, 137.3, 136.5 (d, *J* = 6.7 Hz), 130.2, 129.2, 129.1, 128.9, 126.4, 123.9, 119.9 (d, *J* = 5.4 Hz), 119.6, 39.8 (d, *J* = 66.5 Hz), 27.2, 24.0, 21.6.

**<sup>31</sup>P NMR** (162 MHz, CDCl<sub>3</sub>) δ 64.16.

**HRMS**(ESI-QMA) *m/z*: [M+H]<sup>+</sup> Calcd for C<sub>25</sub>H<sub>33</sub>NO<sub>2</sub>P 410.2243; Found 410.2241.

**(1-(di-tert-butylphosphoryl)-5-fluoro-1H-indol-3-yl)(p-tolyl)methanone (3w)**

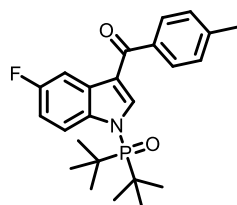

21 mg, 51 % white solid. Rf = 0.5 (Hexane: Acetone = 3:1). M. P. = 187-189 °C

**<sup>1</sup>H NMR** (400 MHz, CDCl<sub>3</sub>) δ 8.49 (dd, *J* = 9.2, 4.7 Hz, 1H), 7.94 (dd, *J* = 9.2, 2.3 Hz, 1H), 7.77 – 7.69 (m, 3H), 7.30 (d, *J* = 8.0 Hz, 2H), 7.07 (d, *J* = 2.7 Hz, 1H), 7.04 (dd, *J* = 9.1, 2.6 Hz, 1H), 2.44 (s, 3H), 1.34 (d, *J* = 15.1 Hz, 18H).

**<sup>13</sup>C NMR** (100 MHz, CDCl<sub>3</sub>) δ 190.6, 159.9 (d, *J* = 239.9 Hz), 142.9, 138.5, 136.9, 135.4 (d, *J* = 4.2 Hz), 129.3, 128.9, 128.2 (dd, *J* = 11.1, 4.5 Hz), 119.9 (t, *J* = 4.0 Hz), 117.4 (d, *J* = 9.0 Hz), 113.3 (d, *J* = 25.2 Hz), 107.1 (d, *J* = 25.0 Hz), 38.8 (d, *J* = 66.9 Hz), 26.6, 21.6.

**<sup>31</sup>P NMR** (162 MHz, CDCl<sub>3</sub>) δ 66.02.

**<sup>19</sup>F NMR** (376 MHz, CDCl<sub>3</sub>) δ -114.57 – -124.52 (m).

**HRMS**(ESI-QMA) *m/z*: [M+H]<sup>+</sup> Calcd for C<sub>24</sub>H<sub>30</sub>FNO<sub>2</sub>P 414.1993; Found 414.1990.

**(6-chloro-1-(di-tert-butylphosphoryl)-1H-indol-3-yl)(p-tolyl)methanone (3x)**

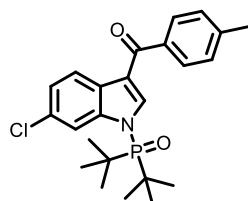

15.9 mg, 37 % white solid. Rf = 0.5 (Hexane: Acetone = 3:1). M. P. = 211-213 °C

**<sup>1</sup>H NMR** (400 MHz, CDCl<sub>3</sub>) δ 8.63 (d, *J* = 1.5 Hz, 1H), 8.17 (d, *J* = 8.5 Hz, 1H), 7.74 (d, *J* = 8.0 Hz, 2H), 7.64 (d, *J* = 1.7 Hz, 1H), 7.31 (d, *J* = 8.2 Hz, 3H), 2.46 (s, 3H), 1.36 (d, *J* = 15.1 Hz, 18H).

<sup>13</sup>C NMR (100 MHz, CDCl<sub>3</sub>) δ 190.5, 142.9, 142.5, 136.9, 134.5 (d, *J* = 4.1 Hz), 130.9, 129.2, 129.0, 125.8 (d, *J* = 3.9 Hz), 124.4, 122.5, 119.9 (d, *J* = 3.4 Hz), 116.3, 38.8 (d, *J* = 66.8 Hz), 26.6, 21.6.

<sup>31</sup>P NMR (162 MHz, CDCl<sub>3</sub>) δ 66.15.

HRMS(ESI-QMA) *m/z*: [M+H]<sup>+</sup> Calcd for C<sub>24</sub>H<sub>30</sub>ClNO<sub>2</sub>P 430.1697; Found 430.1699.

**(1-(di-tert-butylphosphoryl)-5-methoxy-1H-indol-3-yl)(p-tolyl)methanone (3y)**

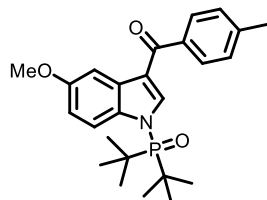

23.0 mg, 54 % yellow oil. R<sub>f</sub> = 0.5 (Hexane: Acetone = 3:1).

<sup>1</sup>H NMR (400 MHz, CDCl<sub>3</sub>) δ 8.42 (d, *J* = 9.2 Hz, 1H), 7.80 (d, *J* = 2.5 Hz, 1H), 7.75 (d, *J* = 8.1 Hz, 2H), 7.64 (d, *J* = 2.1 Hz, 1H), 7.31 (d, *J* = 7.9 Hz, 2H), 6.96 (dd, *J* = 9.2, 2.7 Hz, 1H), 3.88 (s, 3H), 2.46 (s, 3H), 1.35 (d, *J* = 15.0 Hz, 18H).

<sup>13</sup>C NMR (100 MHz, CDCl<sub>3</sub>) δ 191.0, 156.8, 142.6, 137.3, 136.9, 134.7 (d, *J* = 4.4 Hz), 130.2, 129.2, 128.9, 128.1 (d, *J* = 4.4 Hz), 117.2, 115.2, 102.9, 55.7, 38.8 (d, *J* = 67.5 Hz), 26.7, 21.6.

<sup>31</sup>P NMR (162 MHz, CDCl<sub>3</sub>) δ 65.10.

HRMS(ESI-QMA) *m/z*: [M+H]<sup>+</sup> Calcd for C<sub>25</sub>H<sub>33</sub>NO<sub>3</sub>P 426.2193; Found 426.2195.

**(1-(di-tert-butylphosphoryl)-6-methoxy-1H-indol-3-yl)(p-tolyl)methanone (3z)**

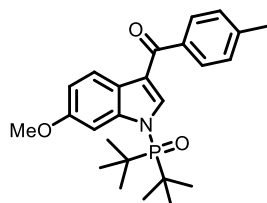

26.7 mg, 63 % white solid. R<sub>f</sub> = 0.5 (Hexane: Acetone = 3:1). M. P. = 131-133 °C

<sup>1</sup>H NMR (400 MHz, CDCl<sub>3</sub>) δ 8.13 (d, *J* = 2.2 Hz, 1H), 8.09 (d, *J* = 8.8 Hz, 1H), 7.73 (d, *J* = 8.1 Hz, 2H), 7.54 (d, *J* = 1.9 Hz, 1H), 7.28 (d, *J* = 7.9 Hz, 2H), 6.96 (dd, *J* = 8.8, 2.3 Hz, 1H), 3.85 (s, 3H), 2.43 (s, 3H), 1.35 (d, *J* = 15.0 Hz, 18H).

<sup>13</sup>C NMR (100 MHz, CDCl<sub>3</sub>) δ 190.8, 157.9, 143.4, 142.6, 137.3, 133.1 (d, *J* = 4.4 Hz), 130.1, 129.1, 129.0, 122.0, 121.0 (d, *J* = 4.3 Hz), 113.9, 99.0, 55.5, 38.8 (d, *J* = 67.4 Hz), 26.7, 21.6.

<sup>31</sup>P NMR (162 MHz, CDCl<sub>3</sub>) δ 65.48.

HRMS(ESI-QMA) *m/z*: [M+H]<sup>+</sup> Calcd for C<sub>25</sub>H<sub>33</sub>NO<sub>3</sub>P 426.2193; Found 426.2193.

**(1-(di-tert-butylphosphoryl)-5-(p-tolyl)-1H-indol-3-yl)(p-tolyl)methanone (3aa)**

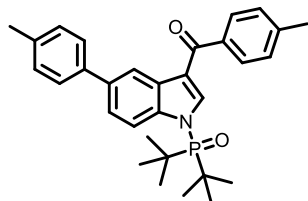

30.7 mg, 63 % white solid. R<sub>f</sub> = 0.4 (Hexane: Acetone = 3:1). M. P. = 193-195 °C

<sup>1</sup>H NMR (400 MHz, CDCl<sub>3</sub>) δ 8.59 (d, *J* = 8.8 Hz, 1H), 8.51 (s, 1H), 7.78 (d, *J* = 7.9 Hz, 2H),

7.69 (s, 1H), 7.59 (d,  $J = 6.7$  Hz, 3H), 7.32 (d,  $J = 7.7$  Hz, 2H), 7.25 (d,  $J = 7.5$  Hz, 3H), 2.46 (s, 3H), 2.40 (s, 3H), 1.38 (d,  $J = 15.0$  Hz, 18H).

$^{13}\text{C}$  NMR (100 MHz,  $\text{CDCl}_3$ )  $\delta$  190.8, 142.7, 141.6, 138.6, 137.3, 136.9, 136.5, 134.7 (d,  $J = 4.1$  Hz), 129.4, 129.2, 129.1, 127.8 (d,  $J = 4.3$  Hz), 127.3, 124.6, 120.3 (d,  $J = 3.7$  Hz), 119.7, 116.5, 38.8 (d,  $J = 67.2$  Hz), 26.7, 21.6, 21.1.

$^{31}\text{P}$  NMR (162 MHz,  $\text{CDCl}_3$ )  $\delta$  65.34.

HRMS(ESI-QMA)  $m/z$ :  $[\text{M}+\text{H}]^+$  Calcd for  $\text{C}_{31}\text{H}_{37}\text{NO}_2\text{P}$  486.2556; Found 486.2556.

**(1-(di-tert-butylphosphoryl)-5-(4-methoxyphenyl)-1H-indol-3-yl)(p-tolyl) methanone (3bb)**

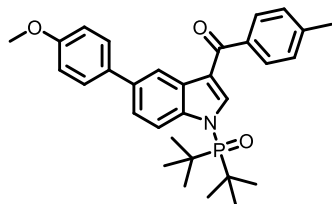

28.5 mg, 57 % white solid.  $R_f = 0.4$  (Hexane: Acetone = 3:1). M. P. = 188-190 °C

$^1\text{H}$  NMR (400 MHz,  $\text{CDCl}_3$ )  $\delta$  8.58 (d,  $J = 8.8$  Hz, 1H), 8.48 (s, 1H), 7.78 (d,  $J = 8.0$  Hz, 2H), 7.69 (d,  $J = 1.7$  Hz, 1H), 7.62 (d,  $J = 8.6$  Hz, 2H), 7.55 (dd,  $J = 8.8, 1.7$  Hz, 1H), 7.32 (d,  $J = 7.8$  Hz, 2H), 6.98 (d,  $J = 8.6$  Hz, 2H), 3.85 (s, 3H), 2.46 (s, 3H), 1.38 (d,  $J = 15.0$  Hz, 18H).

$^{13}\text{C}$  NMR (100 MHz,  $\text{CDCl}_3$ )  $\delta$  190.8, 158.8, 142.7, 141.4, 137.3, 136.7, 134.7 (d,  $J = 4.2$  Hz), 134.2, 129.2, 129.1, 128.5, 127.8 (d,  $J = 4.3$  Hz), 124.4, 120.3 (d,  $J = 3.9$  Hz), 119.42, 116.5, 114.1, 55.3, 38.8 (d,  $J = 67.4$  Hz), 26.7, 21.6.

$^{31}\text{P}$  NMR (162 MHz,  $\text{CDCl}_3$ )  $\delta$  65.25.

HRMS(ESI-QMA)  $m/z$ :  $[\text{M}+\text{H}]^+$  Calcd for  $\text{C}_{31}\text{H}_{37}\text{NO}_3\text{P}$  502.2506; Found 502.2504.

**(1-(di-tert-butylphosphoryl)-6-(p-tolyl)-1H-indol-3-yl)(p-tolyl)methanone (3cc)**

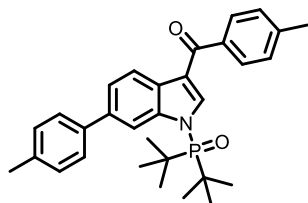

29.6 mg, 61 % white solid.  $R_f = 0.4$  (Hexane: Acetone = 3:1). M. P. = 225-227 °C

$^1\text{H}$  NMR (400 MHz,  $\text{CDCl}_3$ )  $\delta$  8.87 (d,  $J = 1.0$  Hz, 1H), 8.29 (d,  $J = 8.3$  Hz, 1H), 7.78 (d,  $J = 8.1$  Hz, 2H), 7.70 (d,  $J = 2.0$  Hz, 1H), 7.66 – 7.60 (m, 3H), 7.32 (d,  $J = 7.9$  Hz, 3H), 7.23 (d,  $J = 7.8$  Hz, 2H), 2.46 (s, 3H), 2.39 (s, 3H), 1.39 (d,  $J = 15.0$  Hz, 18H).

$^{13}\text{C}$  NMR (100 MHz,  $\text{CDCl}_3$ )  $\delta$  190.8, 143.1, 142.7, 138.5, 138.2, 137.2, 136.7, 134.6, 134.6, 130.1, 129.4, 129.2, 129.0, 127.4, 126.3, 126.3, 122.9, 121.8, 120.1, 120.1, 114.4, 39.2, 38.5, 26.7, 21.6, 21.1.

$^{31}\text{P}$  NMR (162 MHz,  $\text{CDCl}_3$ )  $\delta$  65.59.

HRMS(ESI-QMA)  $m/z$ :  $[\text{M}+\text{H}]^+$  Calcd for  $\text{C}_{31}\text{H}_{37}\text{NO}_2\text{P}$  486.2556; Found 486.2557.

**(1-(di-tert-butylphosphoryl)-6-(4-methoxyphenyl)-1H-indol-3-yl)(p-tolyl) methanone (3dd)**

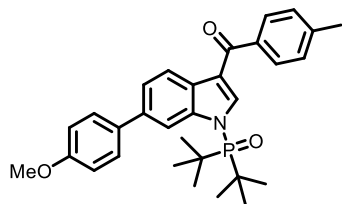

34.1 mg, 68 % white solid. R<sub>f</sub> = 0.4 (Hexane: Acetone = 3:1). M. P. = 210-212 °C

<sup>1</sup>H NMR (400 MHz, CDCl<sub>3</sub>) δ 8.83 (d, *J* = 1.1 Hz, 1H), 8.26 (d, *J* = 8.3 Hz, 1H), 7.78 (d, *J* = 8.1 Hz, 2H), 7.67 (dd, *J* = 4.1, 2.0 Hz, 2H), 7.66 – 7.64 (m, 1H), 7.59 (dd, *J* = 8.4, 1.6 Hz, 1H), 7.32 (d, *J* = 7.9 Hz, 2H), 6.97 (d, *J* = 8.8 Hz, 2H), 3.85 (s, 3H), 2.46 (s, 3H), 1.38 (d, *J* = 15.0 Hz, 18H).

<sup>13</sup>C NMR (100 MHz, CDCl<sub>3</sub>) δ 190.8, 159.0, 143.1, 142.7, 137.8, 137.3, 134.5 (d, *J* = 4.7 Hz), 134.0, 129.1, 129.1, 128.5, 126.0 (d, *J* = 4.4 Hz), 122.8, 121.7, 120.1 (d, *J* = 4.1 Hz), 114.1, 55.4, 38.8 (d, *J* = 67.5 Hz), 26.7, 21.6.

<sup>31</sup>P NMR (162 MHz, CDCl<sub>3</sub>) δ 65.41.

HRMS(ESI-QMA) m/z: [M+H]<sup>+</sup> Calcd for C<sub>31</sub>H<sub>37</sub>NO<sub>3</sub>P 502.2506; Found 502.2508.

## 5. Synthetic applications

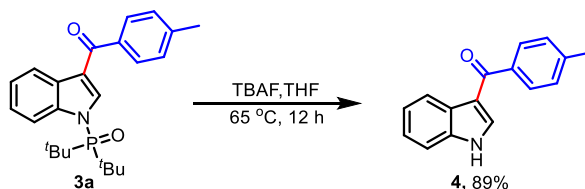

A mixture of **3a** (0.1 mmol, 39.5 mg, 1 equiv), TBAF (1 M in THF, 0.2 mL) and THF (3.0 mL) were added in a tube under air atmosphere. After this, the mixture was stirred at 65 °C for 12 h. After the reaction was completed, the resulting mixture was extracted with ethyl acetate. The combined organic layers were evaporated under vacuum. The desired product **4** was obtained in 89% yield after purified by column chromatography on silica gel with a mixture of petroleum ether/ethyl acetate (v/v = 20/1).

### (1H-indol-3-yl)(p-tolyl)methanone (**4**)

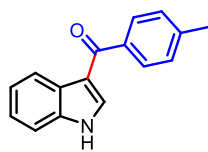

20.8 mg, 89 % white solid. R<sub>f</sub> = 0.5 (hexane: ethyl acetate = 5:1). (known compound)

<sup>1</sup>H NMR (400 MHz, CDCl<sub>3</sub>) δ 9.19 (s, 1H), 8.43 – 8.33 (m, 1H), 7.72 (d, *J* = 7.9 Hz, 2H), 7.62 (d, *J* = 2.9 Hz, 1H), 7.42 – 7.37 (m, 1H), 7.32 – 7.27 (m, 3H), 7.24 (d, *J* = 2.4 Hz, 1H), 2.41 (s, 3H).

<sup>13</sup>C NMR (100 MHz, CDCl<sub>3</sub>) δ 191.6, 141.9, 138.0, 136.5, 133.8, 129.1, 126.5, 124.0, 122.8, 122.5, 117.2, 111.60, 21.7.

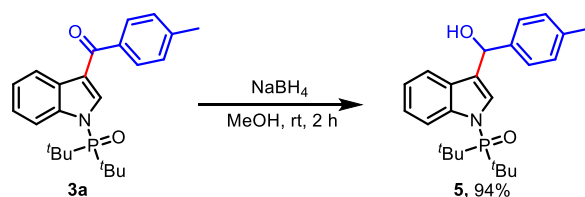

A mixture of **3a** (0.1 mmol, 39.5 mg, 1 equiv), MeOH (2.0 mL) and NaBH<sub>4</sub> (0.25 mmol, 10

mg, 2.5 equiv) were added in a tube under air atmosphere. After this, the mixture was stirred at room temperature for 2 h. After the reaction was completed, the resulting mixture was extracted with ethyl acetate. The combined organic layers were evaporated under vacuum. The desired product **5** was obtained in 94% yield after purified by column chromatography on silica gel with a mixture of petroleum ether/ Acetone (v/v = 5/1).

#### di-tert-butyl(3-(hydroxy(p-tolyl)methyl)-1H-indol-1-yl)phosphine oxide (**5**)

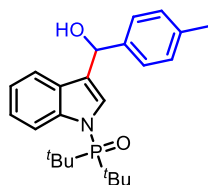

37.6 mg, 94 % white solid. Rf = 0.5 (hexane: ethyl acetate = 5:1) M. P. = 149-152 °C.

<sup>1</sup>H NMR (400 MHz, CDCl<sub>3</sub>) δ 8.47 (d, *J* = 8.4 Hz, 1H), 7.46 (d, *J* = 7.8 Hz, 1H), 7.36 (d, *J* = 7.9 Hz, 2H), 7.21 – 7.17 (m, 3H), 7.11 (dj, *J* = 5.4 Hz, 2H), 6.12 (s, 1H), 3.52 (s, 1H), 2.37 (s, 3H), 1.33 (dd, *J* = 14.7, 8.2 Hz, 18H).

<sup>13</sup>C NMR (100 MHz, CDCl<sub>3</sub>) δ 142.6, 140.2, 137.5, 129.2, 127.4 (d, *J* = 5.2 Hz), 126.7, 124.2 (d, *J* = 5.1 Hz), 124.0 (d, *J* = 4.6 Hz), 123.7, 121.5, 119.3, 116.4, 70.3, 38.6 (d, *J* = 69.0 Hz), 26.7, 21.2.

<sup>31</sup>P NMR (162 MHz, CDCl<sub>3</sub>) δ 63.08.

## 6 Mechanism experiments

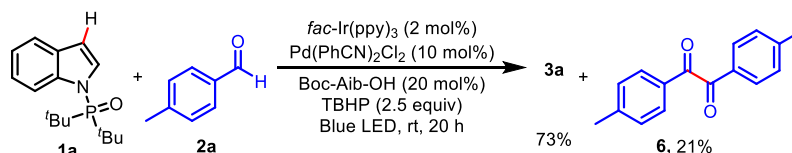

A mixture of **1a** (27.7 mg, 0.1 mmol, 1equiv), Pd(PhCN)<sub>2</sub>Cl<sub>2</sub> (3.8 mg, 0.01mmol, 0.1 equiv), *fac*-Ir(ppy)<sub>3</sub> (1.3 mg, 0.002 mmol, 0.02 equiv), Boc-Aib-OH (3.7 mg, 0.02 mmol, 0.2 equiv), dry ethyl acetate (1.0 mL), TBHP (50 μL, 0.25 mmol, 2.5 equiv) and **2a** (0.25 mmol, 2.5 equiv) in a 4 mL vial, then the vial was purged with Ar for 1 min under stirring. The vial was sealed with PTFE cap. The reaction was stirred and irradiated with a 30 W Blue LEDs (approximately 1 cm away from the light source) at room temperature for 20 h. The desired product **6** was obtained in 21% yield after purified by column chromatography on silica gel with a mixture of petroleum ether/ ethyl acetate (v/v = 20/1).

#### 1,2-di-p-tolyethane-1,2-dione (**6**)

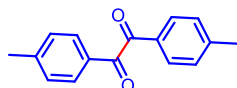

12.4 mg, 21 % white solid. Rf = 0.5 (hexane: ethyl acetate = 20:1). (known compound).

<sup>1</sup>H NMR (400 MHz, CDCl<sub>3</sub>) δ 8.01 (d, *J* = 8.1 Hz, 4H), 7.28 (d, *J* = 8.0 Hz, 4H), 2.44 (s, 6H).

<sup>13</sup>C NMR (100 MHz, CDCl<sub>3</sub>) δ 172.4, 144.8, 130.4, 129.4, 126.7, 21.9.

The data is consisted with previous literature.<sup>2</sup>

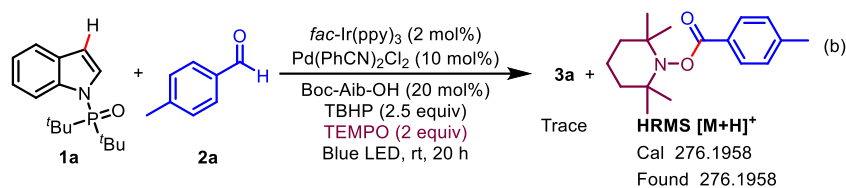

A mixture of **1a** (27.7 mg, 0.1 mmol, 1equiv), Pd(PhCN)<sub>2</sub>Cl<sub>2</sub> (3.8 mg, 0.01mmol, 0.1 equiv), *fac*-Ir(ppy)<sub>3</sub> (1.3 mg, 0.002 mmol, 0.02 equiv), Boc-Aib-OH (3.7 mg, 0.02 mmol, 0.2 equiv), dry ethyl acetate (1.0 mL), TBHP (50 μL, 0.25 mmol, 2.5 equiv), TEMPO (2 equiv) and **2a** (0.25 mmol, 2.5 equiv) in a 4 mL vial, then the vial was purged with Ar for 1 min under stirring. The vial was sealed with PTFE cap. The reaction was stirred and irradiated with a 30 W Blue LEDs (approximately 1 cm away from the light source) at room temperature for 20 h. No desired product **3a** was detected. And the coupling product of Acyl radical and TEMPO was detected by HRMS

WXM-131A #22-24 RT: 0.10-0.11 AV: 3 SB: 64 0.52-0.80 NL: 5.01E8  
T: FTMS + p ESI Full ms [100.0000-1000.0000]

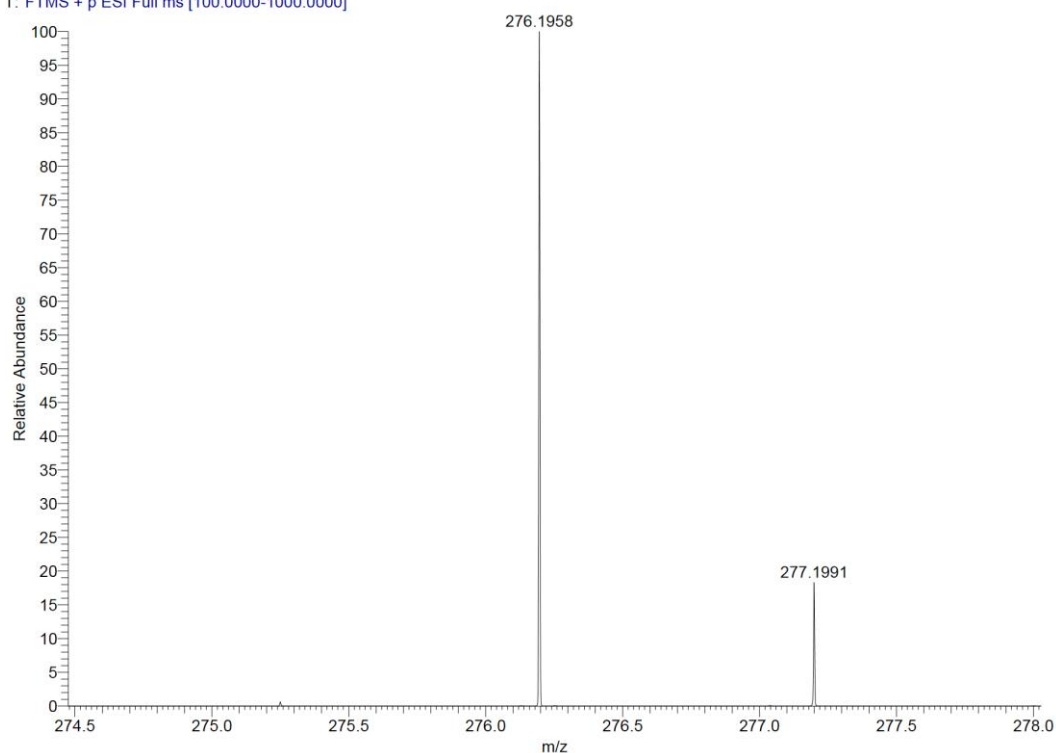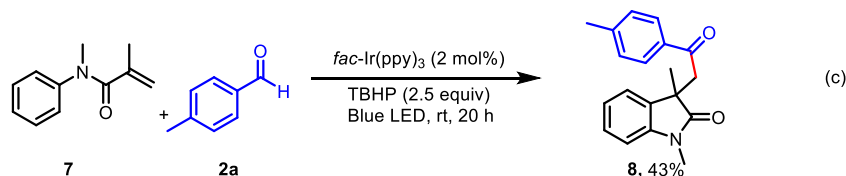

A mixture of **7** (17.5 mg, 0.1 mmol, 1equiv), *fac*-Ir(ppy)<sub>3</sub> (1.3 mg, 0.002 mmol, 0.02 equiv), dry ethyl acetate (1.0 mL), TBHP (50 μL, 0.25 mmol, 2.5 equiv) and **2a** (0.25 mmol, 2.5 equiv) in a 4 mL vial, then the vial was purged with Ar for 1 min under stirring. The vial was sealed with PTFE cap. The reaction was stirred and irradiated with a 30 W Blue LEDs (approximately 1 cm away from the light source) at room temperature for 20 h. The desired product **8** was obtained in 43% yield after purified by column chromatography on silica gel with a mixture of petroleum ether/ethyl acetate (v/v = 10/1).

### 1,3-dimethyl-3-(2-oxo-2-(p-tolyl)ethyl)indolin-2-one(8)

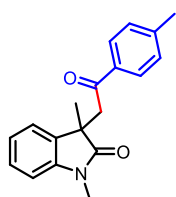

16.0 mg, 43 % white solid. R<sub>f</sub> = 0.3 (Hexane: ethyl acetate = 4:1), (known compound). <sup>1</sup>H NMR (400 MHz, CDCl<sub>3</sub>) δ 7.73 (d, *J* = 8.1 Hz, 2H), 7.24 (d, *J* = 7.7 Hz, 1H), 7.19 (d, *J* = 8.0 Hz, 2H), 7.13 (d, *J* = 7.3 Hz, 1H), 6.97 (t, *J* = 7.5 Hz, 1H), 6.89 (d, *J* = 7.8 Hz, 1H), 3.66 (q, *J* = 17.9 Hz, 2H), 3.31 (s, 3H), 2.37 (s, 3H), 1.43 (s, 3H).

<sup>13</sup>C NMR (100 MHz, CDCl<sub>3</sub>) δ 195.7, 180.6, 143.8, 134.0, 133.8, 129.1, 128.1, 127.8, 122.1, 121.8, 108.1, 45.9, 45.3, 26.4, 24.9, 21.6.

The data is consisted with previous literature.<sup>3</sup>

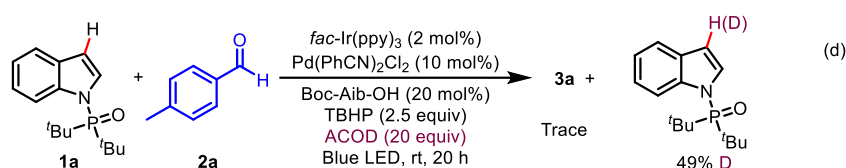

A mixture of **1a** (27.7 mg, 0.1 mmol, 1equiv), Pd(PhCN)<sub>2</sub>Cl<sub>2</sub> (3.8 mg, 0.01mmol, 0.1 equiv), *fac*-Ir(ppy)<sub>3</sub> (1.3 mg, 0.002 mmol, 0.02 equiv), Boc-Aib-OH (3.7 mg, 0.02 mmol, 0.2 equiv), dry ethyl acetate (1.0 mL), TBHP (50 μL, 0.25 mmol, 2.5 equiv), deuterated acetic acid (20 equiv) and **2a** (0.25 mmol, 2.5 equiv) in a 4 mL vial, then the vial was purged with Ar for 1 min under stirring. The vial was sealed with PTFE cap. The reaction was stirred and irradiated with a 30 W Blue LEDs (approximately 1 cm away from the light source) at room temperature for 20 h. No desired product **3a** was detected. We isolated the starting material **1a**.

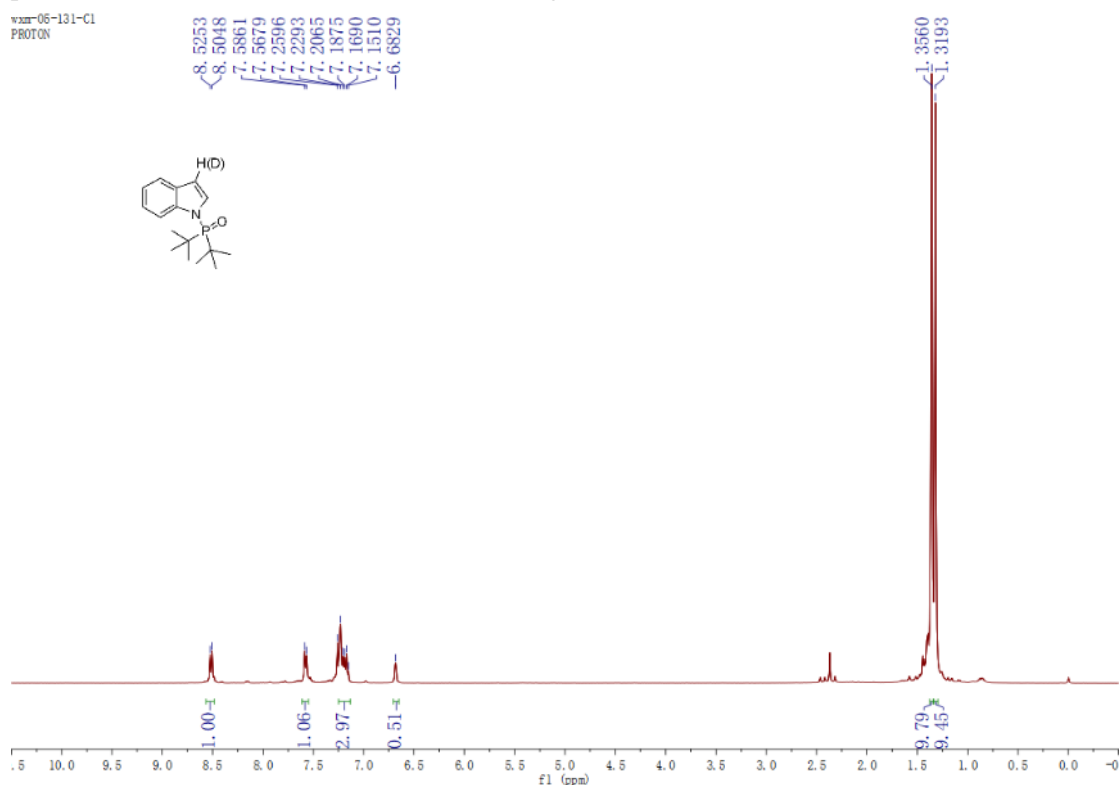



In order to provide that there is no coordination between the Pd catalyst and phosphine oxide, we prepared phosphine oxide protected 3-methyl-indole. When we test the  $^{31}\text{P}$  NMR of phosphine oxide protected 3-methyl-indole and the combination of phosphine oxide protected 3-methyl-indole and Pd catalyst, we did not see a change of phosphine spectrum.

w331-08-bu-p-3-H  
F31

-62.54

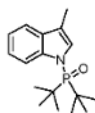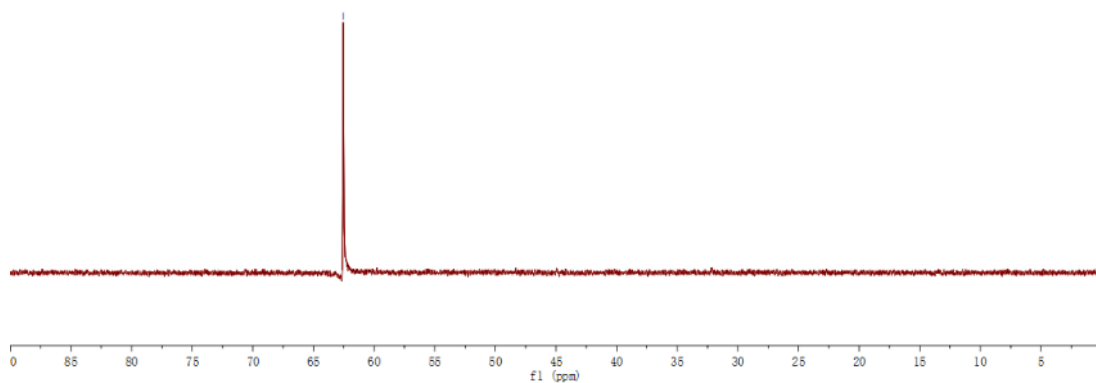

w331-08-bu-p-4-H  
F31

-62.57

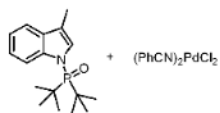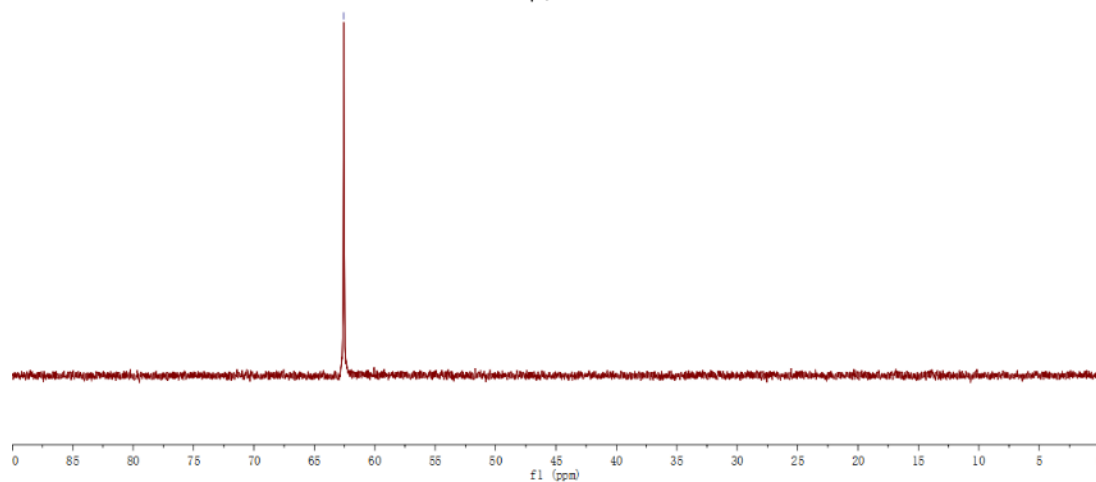

While when we test the  $^{31}\text{P}$  NMR of phosphine oxide protected 3-methyl-indole and the combination of phosphine oxide protected 3-methyl-indole and amino acid ligand, there is an obvious change (63.27 ppm to 64.41 ppm). We guess that the ligand could interact with phosphine oxide via hydrogen bond, which could be helpful with the stabilization of organic palladium intermediates.

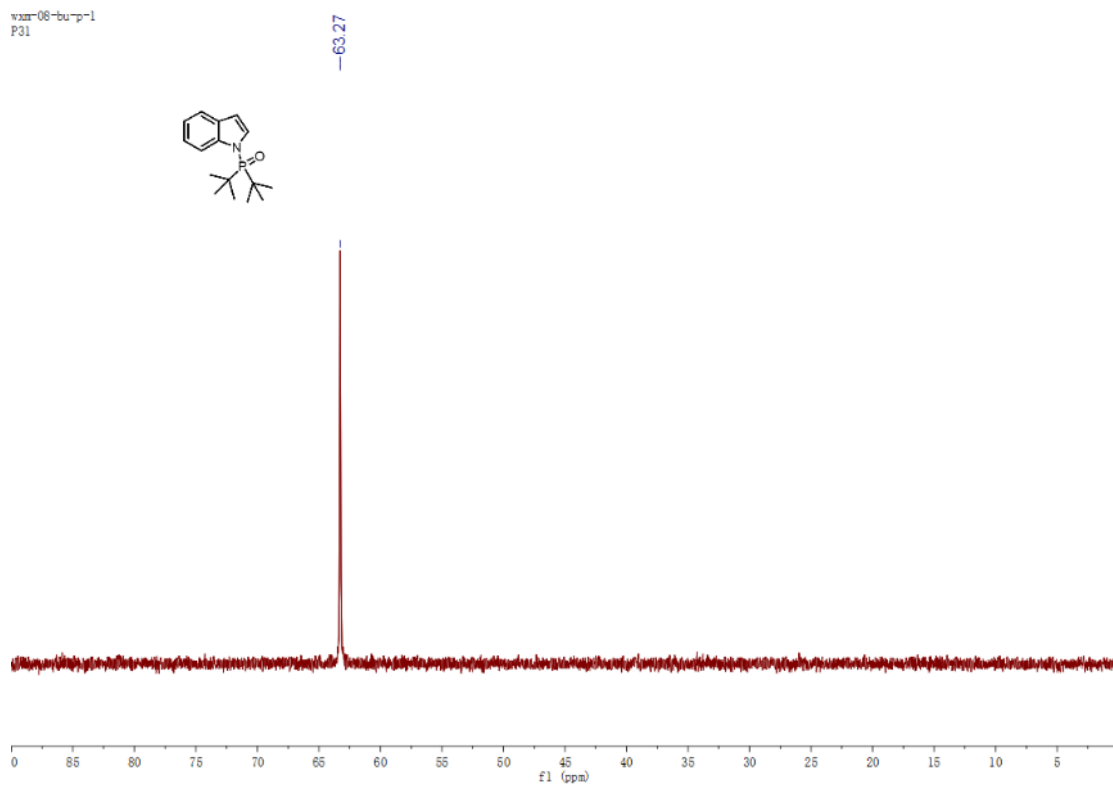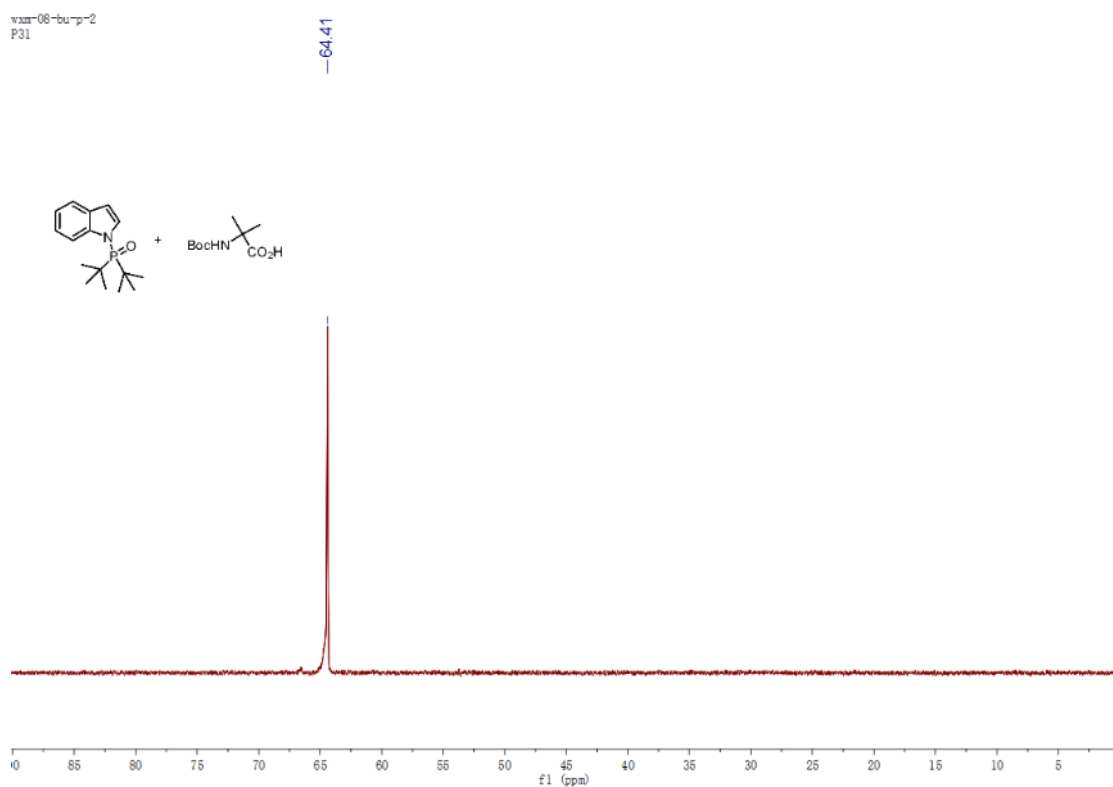

---

## 7 X-ray structure of 3a

Crystals **3a** were grown in slow diffusion with Acetone/Hexanes = 1:1 mL for two days as clusters of yellow prisms. The crystallographic data of **3a** were collected on a Rigaku Saturn70 (4x4 bin mode) diffractometer at 113(2) K with Mo-K $\alpha$  radiation ( $\lambda = 0.710747$  Å) by  $\omega$  scan mode. The program Crystal Clear was used for integration of the diffraction profiles. All the structures were solved by direct methods using the SHELXS program of the SHELXTL8 package and refined by full-matrix least-squares methods with SHELXL (semi-empirical absorption corrections were applied using SADABS program). Displacement ellipsoids are scaled to the 50% probability level.

---

|                        |                                            |                                 |               |
|------------------------|--------------------------------------------|---------------------------------|---------------|
| Bond precision:        | C-C = 0.0018 Å                             | Wavelength=0.71073              |               |
| Cell:                  | a=16.6702 (8)                              | b=8.6322 (3)                    | c=16.6363 (7) |
|                        | alpha=90                                   | beta=116.458 (6)                | gamma=90      |
| Temperature:           | 113 K                                      |                                 |               |
|                        | Calculated                                 | Reported                        |               |
| Volume                 | 2143.23 (19)                               | 2143.23 (19)                    |               |
| Space group            | P 21/c                                     | P 1 21/c 1                      |               |
| Hall group             | -P 2ybc                                    | -P 2ybc                         |               |
| Moiety formula         | C24 H30 N O2 P                             | C24 H30 N O2 P                  |               |
| Sum formula            | C24 H30 N O2 P                             | C24 H30 N O2 P                  |               |
| Mr                     | 395.46                                     | 395.46                          |               |
| Dx, g cm <sup>-3</sup> | 1.226                                      | 1.226                           |               |
| Z                      | 4                                          | 4                               |               |
| Mu (mm <sup>-1</sup> ) | 0.147                                      | 0.147                           |               |
| F000                   | 848.0                                      | 848.0                           |               |
| F000'                  | 848.72                                     |                                 |               |
| h, k, lmax             | 25, 13, 25                                 | 25, 12, 25                      |               |
| Nref                   | 7983                                       | 7447                            |               |
| Tmin, Tmax             | 0.968, 0.975                               | 0.756, 1.000                    |               |
| Tmin'                  | 0.968                                      |                                 |               |
| Correction method=     | # Reported T Limits: Tmin=0.756 Tmax=1.000 |                                 |               |
| AbsCorr =              | MULTI-SCAN                                 |                                 |               |
| Data completeness=     | 0.933                                      | Theta(max)= 32.836              |               |
| R(reflections)=        | 0.0479( 5814)                              | wR2(reflections)= 0.1296( 7447) |               |
| S =                    | 1.034                                      | Npar= 260                       |               |

---

The following ALERTS were generated. Each ALERT has the format  
`test-name_ALERT_alert-type_alert-level`.  
Click on the hyperlinks for more details of the test.

---

|                                                                                                   |                                                  |             |
|---------------------------------------------------------------------------------------------------|--------------------------------------------------|-------------|
|  Alert level C |                                                  |             |
| <a href="#">PLAT906 ALERT 3 C</a>                                                                 | Large K Value in the Analysis of Variance .....  | 3.383 Check |
|  Alert level G |                                                  |             |
| <a href="#">PLAT910 ALERT 3 G</a>                                                                 | Missing # of FCF Reflection(s) Below Theta(Min). | 2 Note      |
| <a href="#">PLAT912 ALERT 4 G</a>                                                                 | Missing # of FCF Reflections Above STh/L= 0.600  | 510 Note    |
| <a href="#">PLAT913 ALERT 3 G</a>                                                                 | Missing # of Very Strong Reflections in FCF .... | 1 Note      |
| <a href="#">PLAT941 ALERT 3 G</a>                                                                 | Average HKL Measurement Multiplicity .....       | 4.2 Low     |
| <a href="#">PLAT978 ALERT 2 G</a>                                                                 | Number C-C Bonds with Positive Residual Density. | 17 Info     |

---

0 ALERT level A = Most likely a serious problem - resolve or explain  
0 ALERT level B = A potentially serious problem, consider carefully  
1 ALERT level C = Check. Ensure it is not caused by an omission or oversight  
5 ALERT level G = General information/check it is not something unexpected

0 ALERT type 1 CIF construction/syntax error, inconsistent or missing data  
1 ALERT type 2 Indicator that the structure model may be wrong or deficient  
4 ALERT type 3 Indicator that the structure quality may be low  
1 ALERT type 4 Improvement, methodology, query or suggestion  
0 ALERT type 5 Informative message, check

---

46 Y

PLATON-Apr 25 04:26:12 2022 - (190222)

Z 131

r20210121d

P 1 21/c 1

R = 0.05

RES= 0 -92 X

NOMOVE FORCED

Prob = 50  
Temp = 113

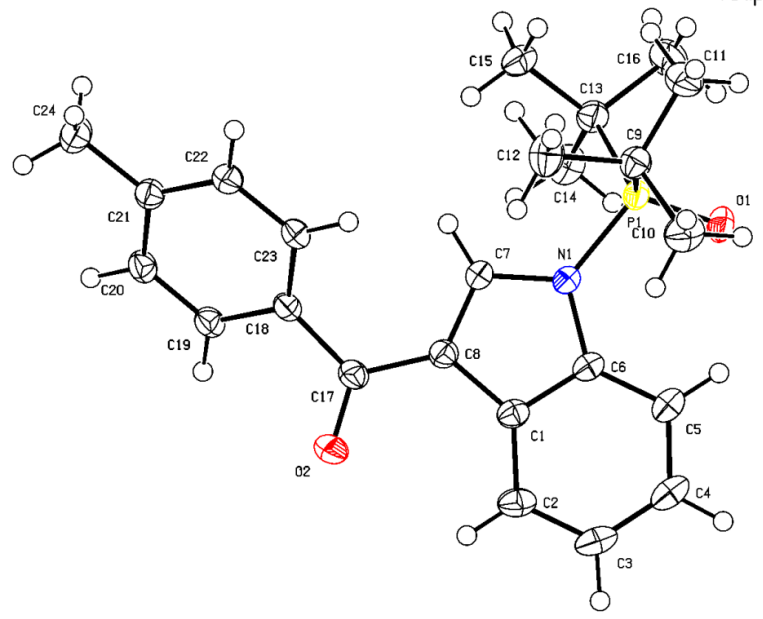

## 8. NMR spectrum

$^1\text{H}$  NMR spectrum (400 MHz,  $\text{CDCl}_3$ ) of compound **1a**

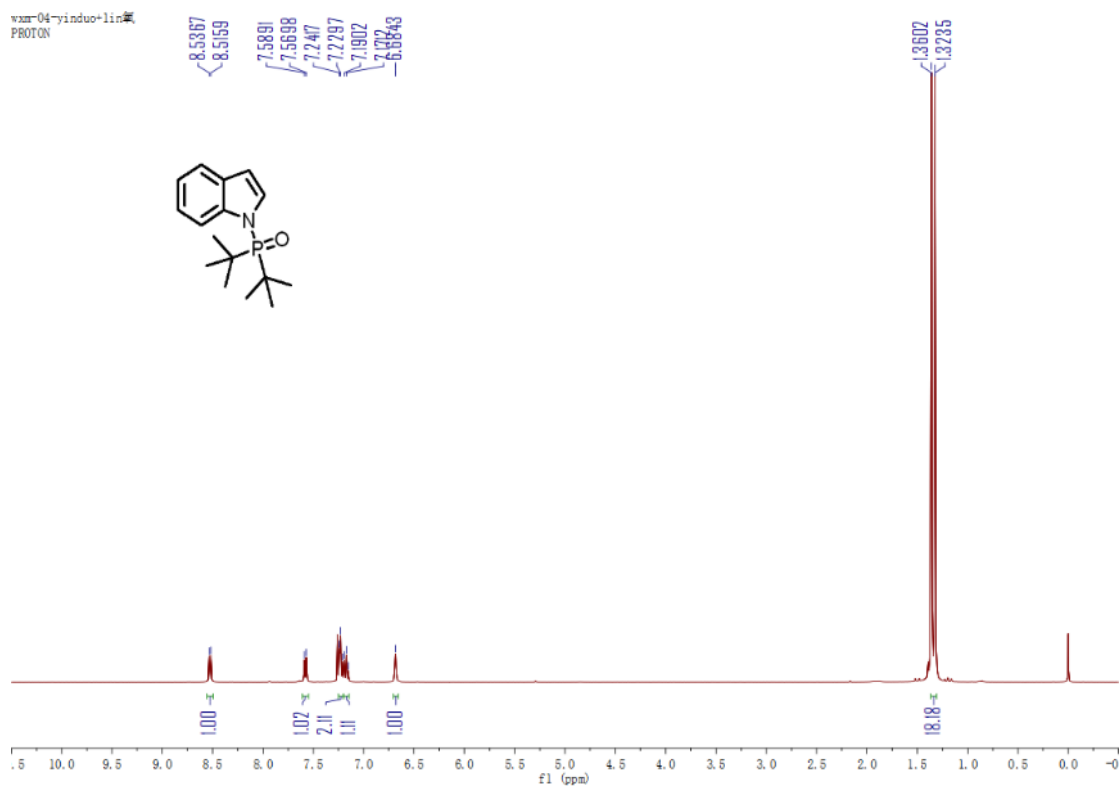

$^1\text{H}$  NMR spectrum (400 MHz,  $\text{CDCl}_3$ ) of compound **1b**

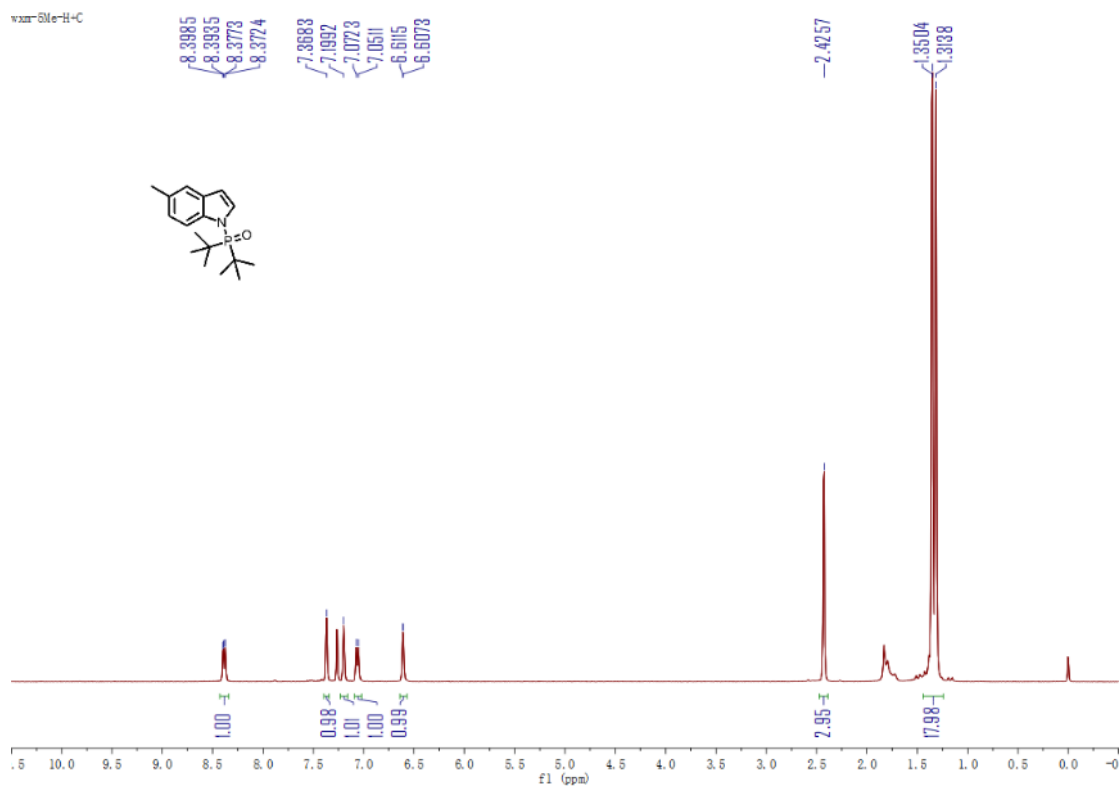

<sup>1</sup>H NMR spectrum (400 MHz, CDCl<sub>3</sub>) of compound **1c**

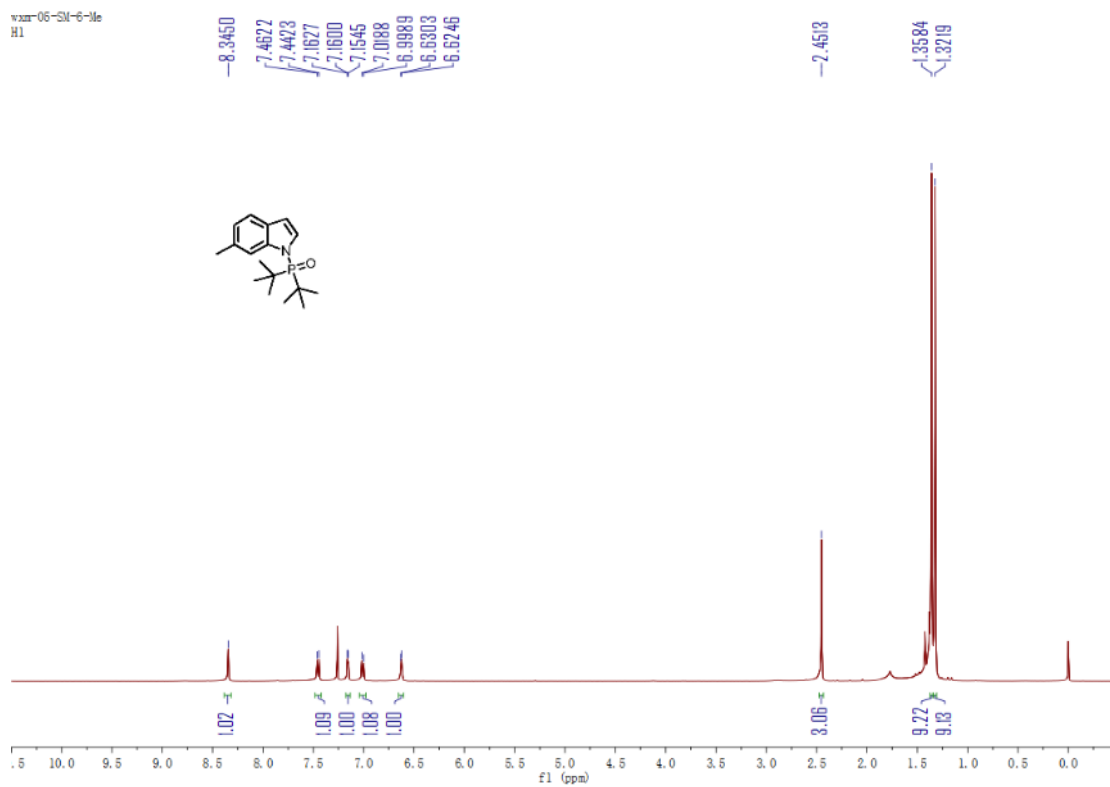

<sup>1</sup>H NMR spectrum (400 MHz, CDCl<sub>3</sub>) of compound **1d**

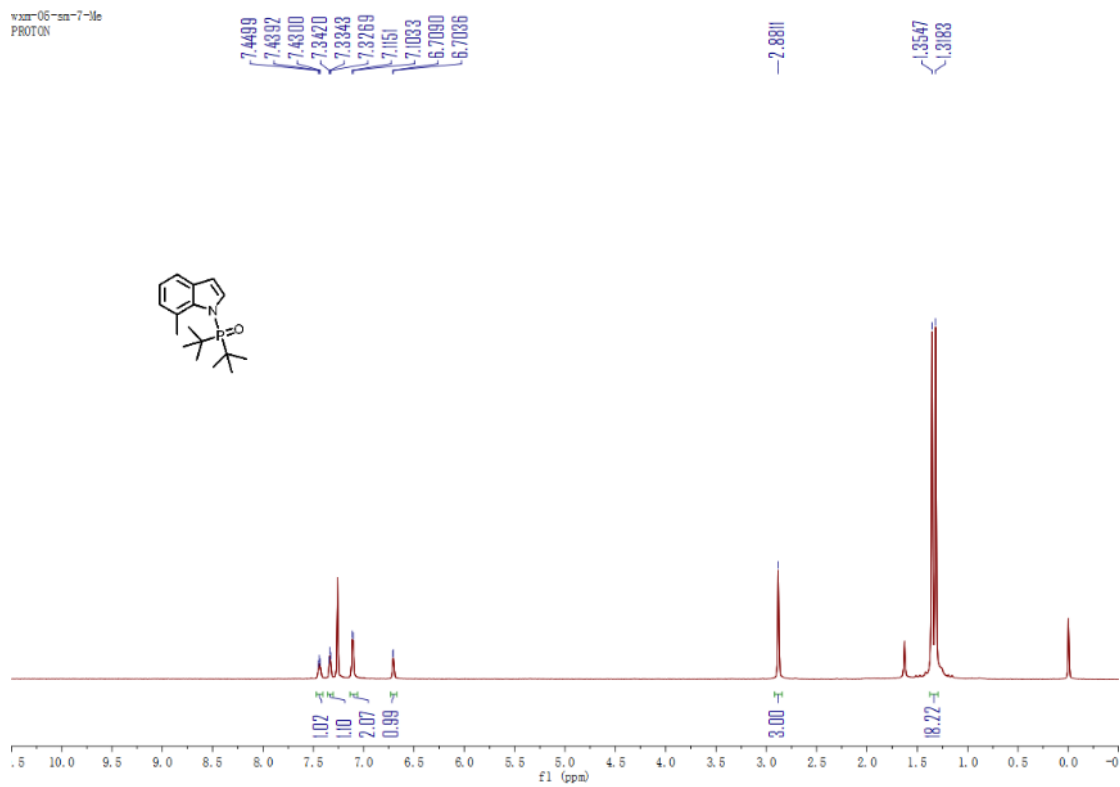

<sup>1</sup>H NMR spectrum (400 MHz, CDCl<sub>3</sub>) of compound **1e**

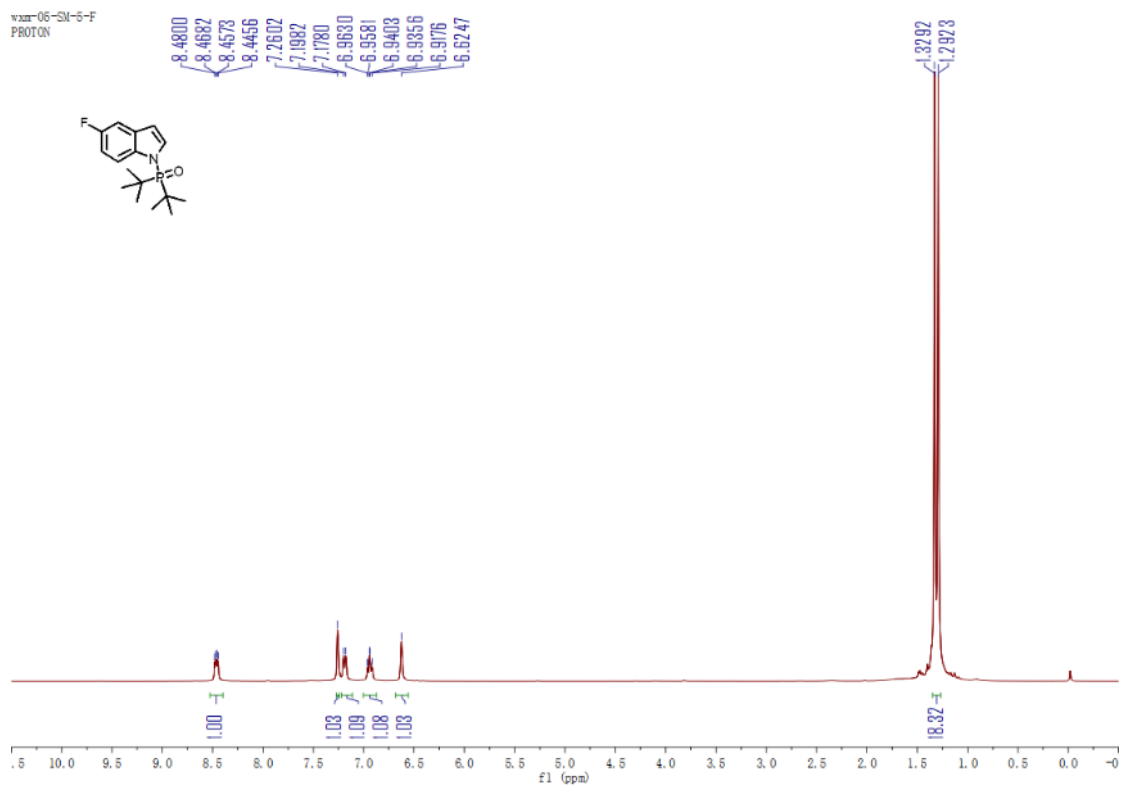

<sup>1</sup>H NMR spectrum (400 MHz, CDCl<sub>3</sub>) of compound **1f**

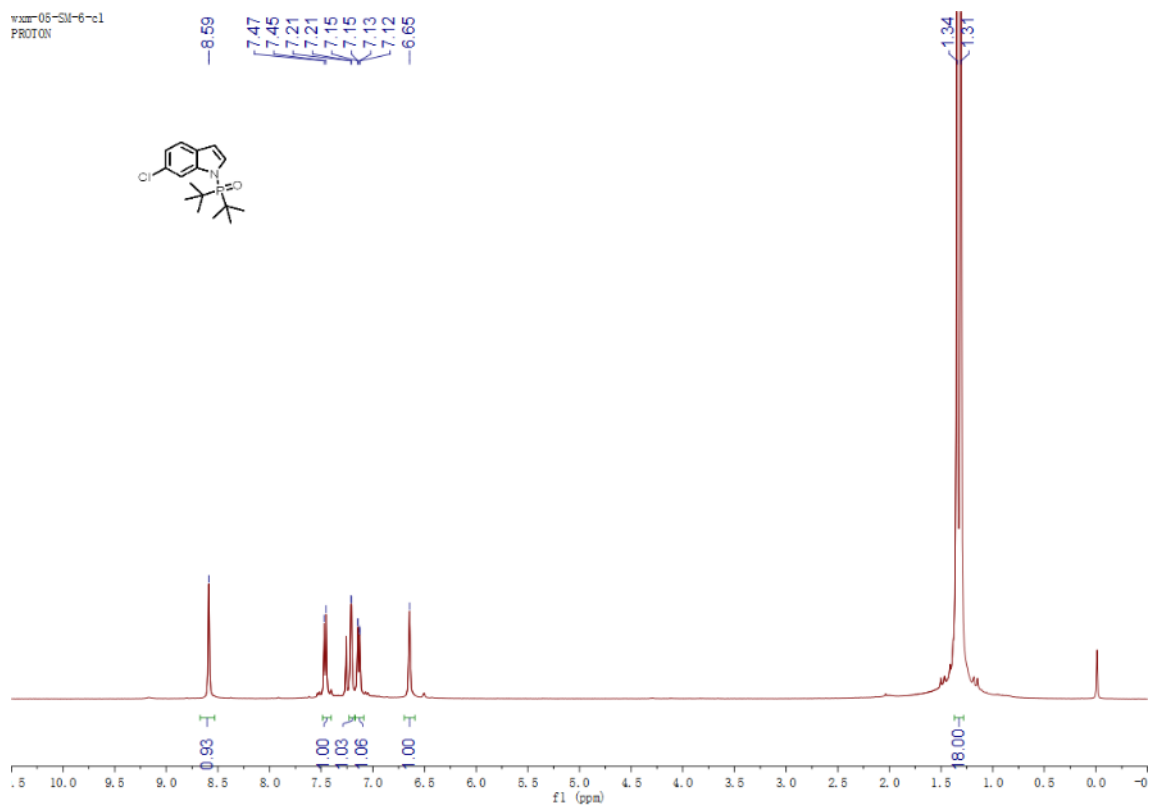

<sup>1</sup>H NMR spectrum (400 MHz, CDCl<sub>3</sub>) of compound **1g**

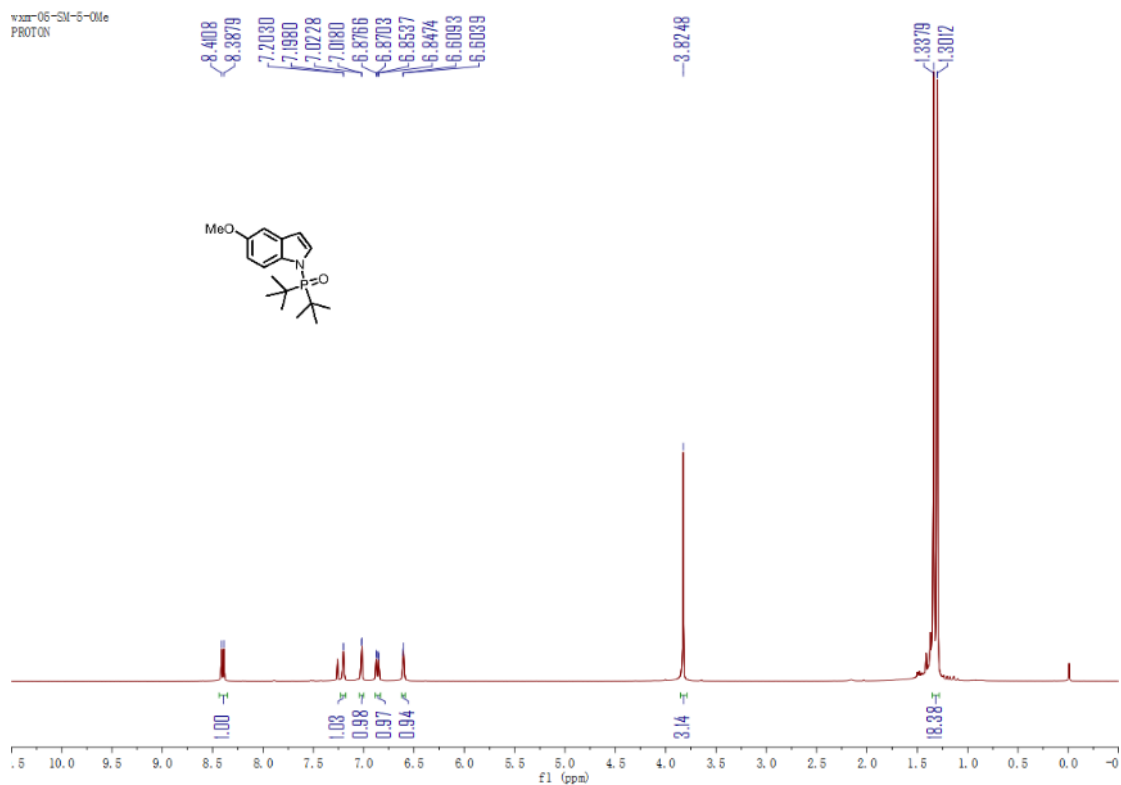

<sup>1</sup>H NMR spectrum (400 MHz, CDCl<sub>3</sub>) of compound **1h**

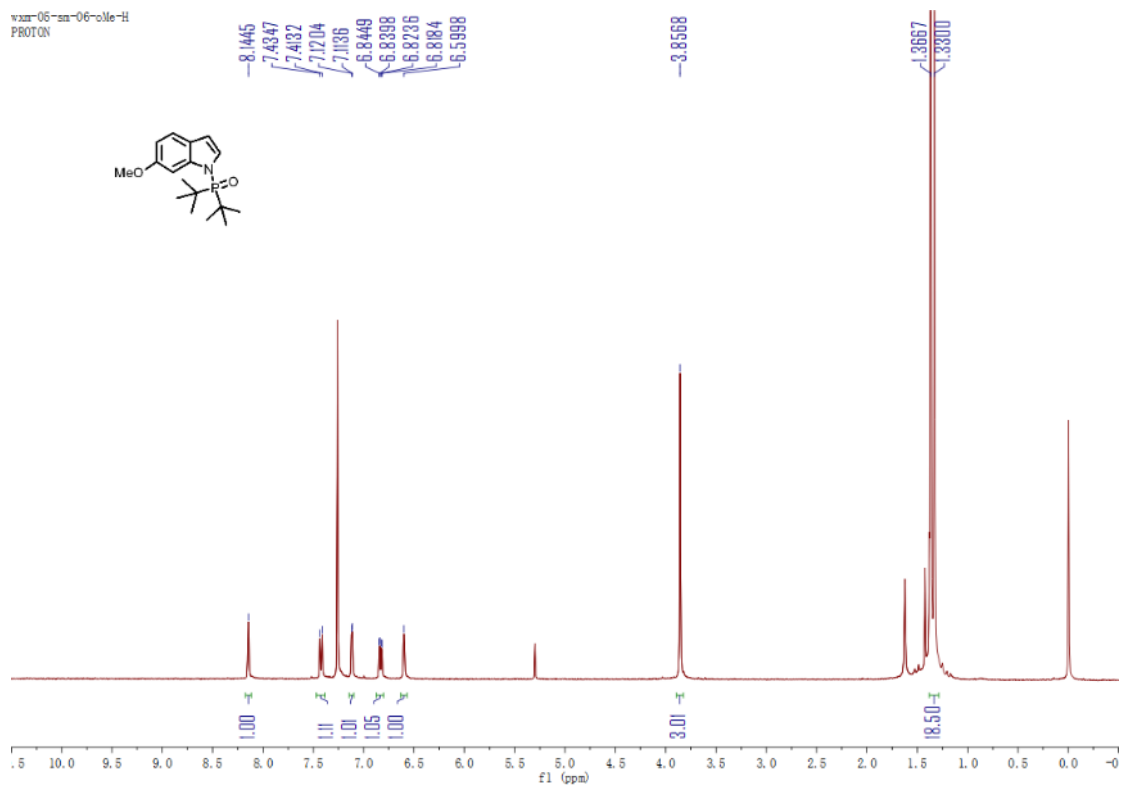



<sup>1</sup>H NMR spectrum (400 MHz, CDCl<sub>3</sub>) of compound **1i**

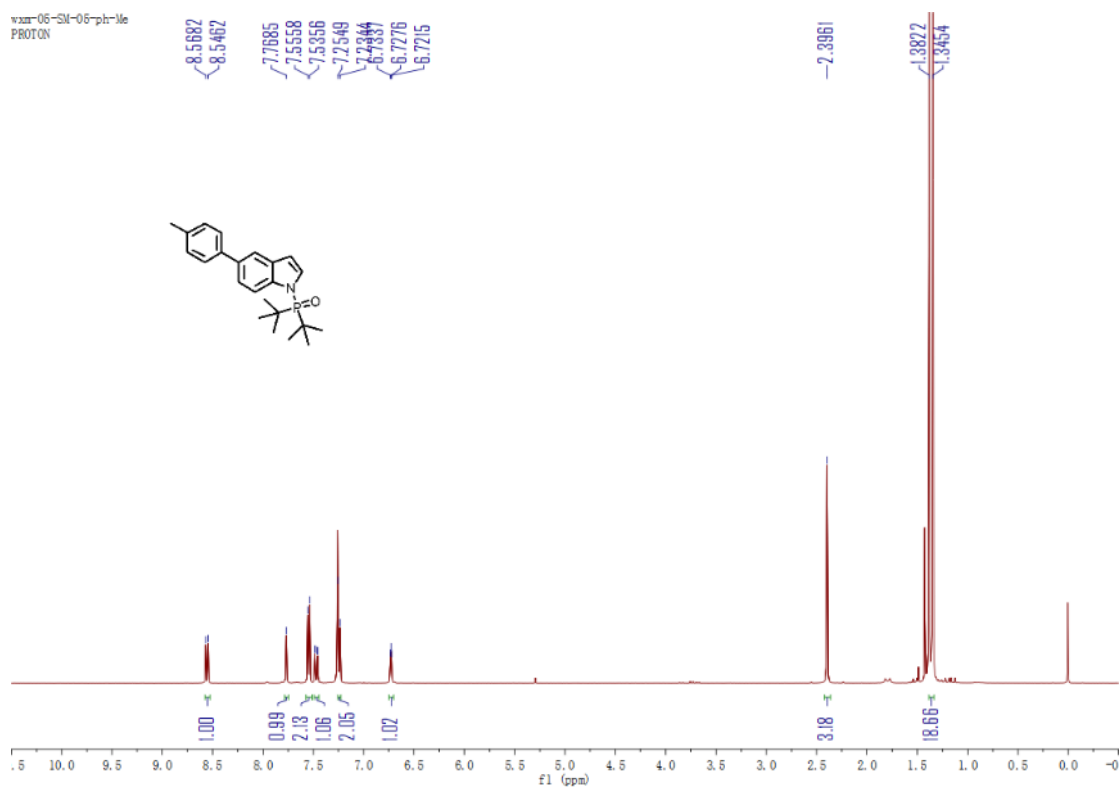

<sup>1</sup>H NMR spectrum (400 MHz, CDCl<sub>3</sub>) of compound **1j**

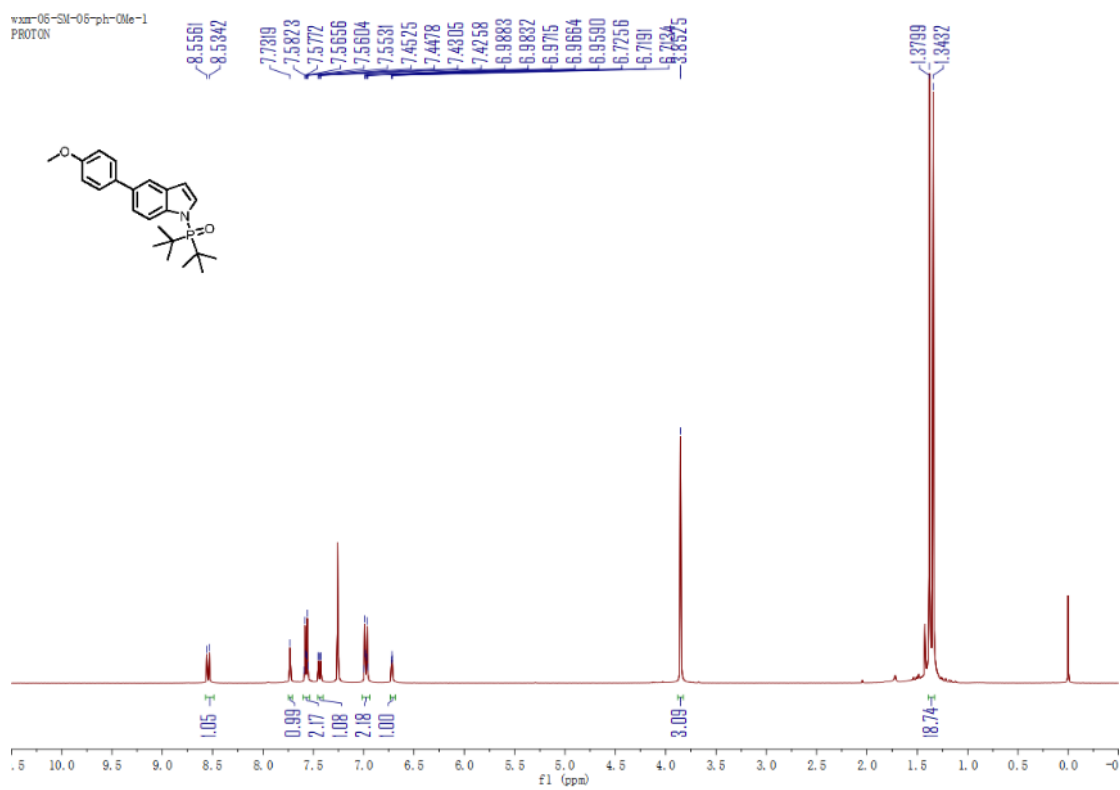

<sup>1</sup>H NMR spectrum (400 MHz, CDCl<sub>3</sub>) of compound **1k**

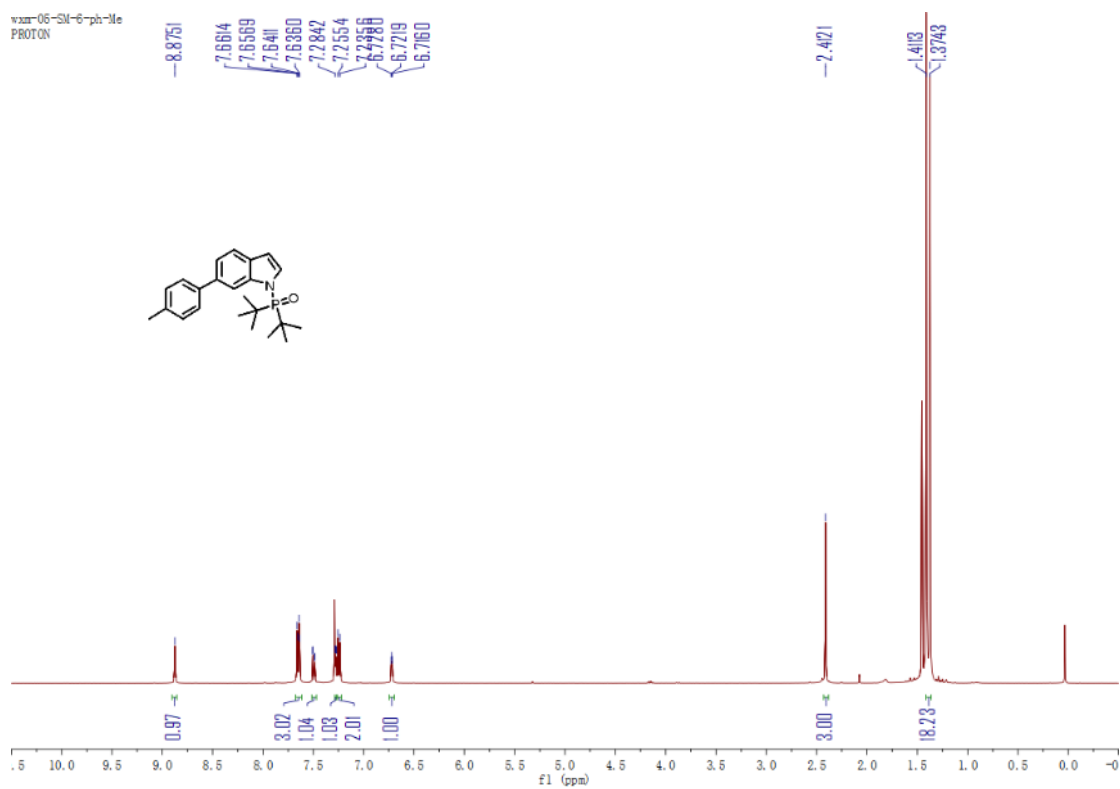

<sup>1</sup>H NMR spectrum (400 MHz, CDCl<sub>3</sub>) of compound **1l**

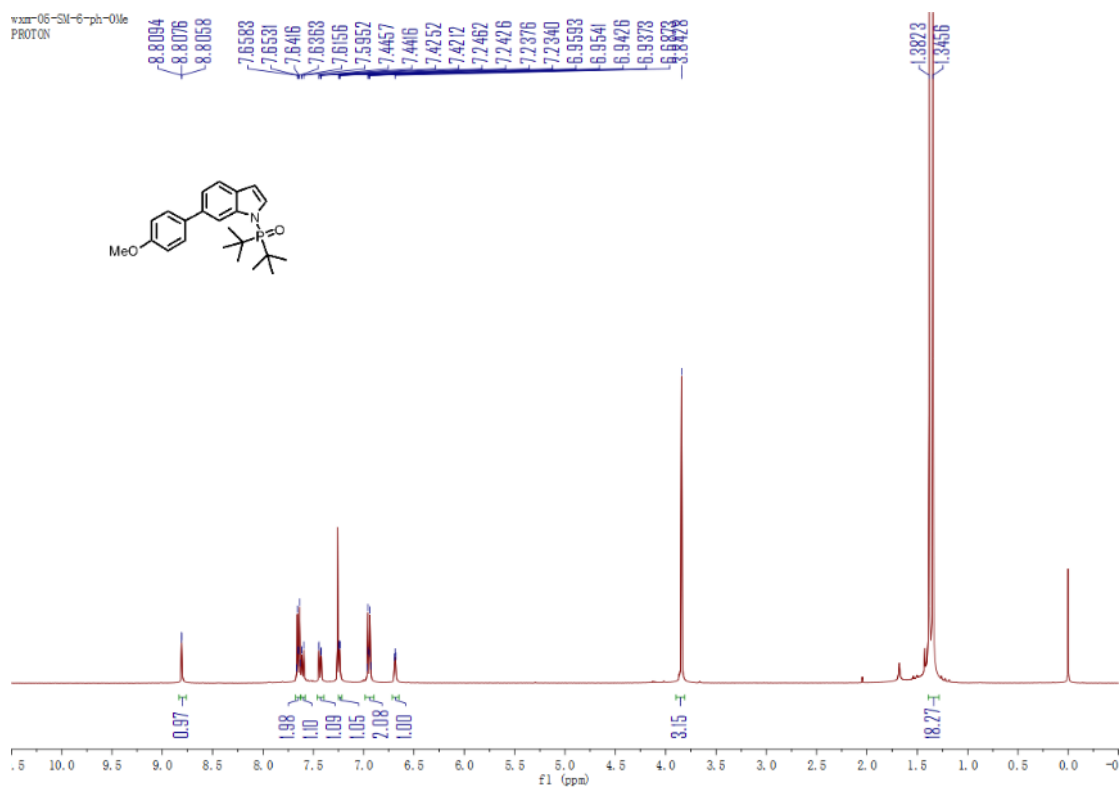

<sup>1</sup>H NMR spectrum (400 MHz, CDCl<sub>3</sub>) of compound **3a**

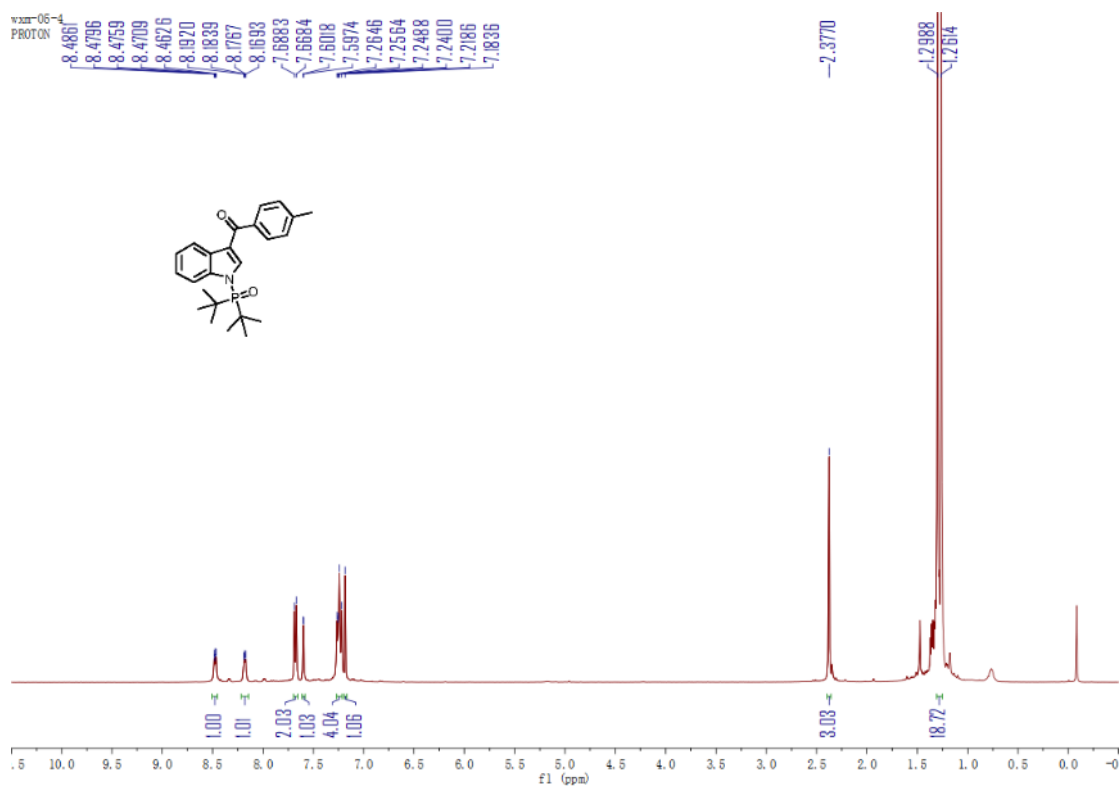

<sup>13</sup>C NMR spectrum (100 MHz, CDCl<sub>3</sub>) of compound **3a**

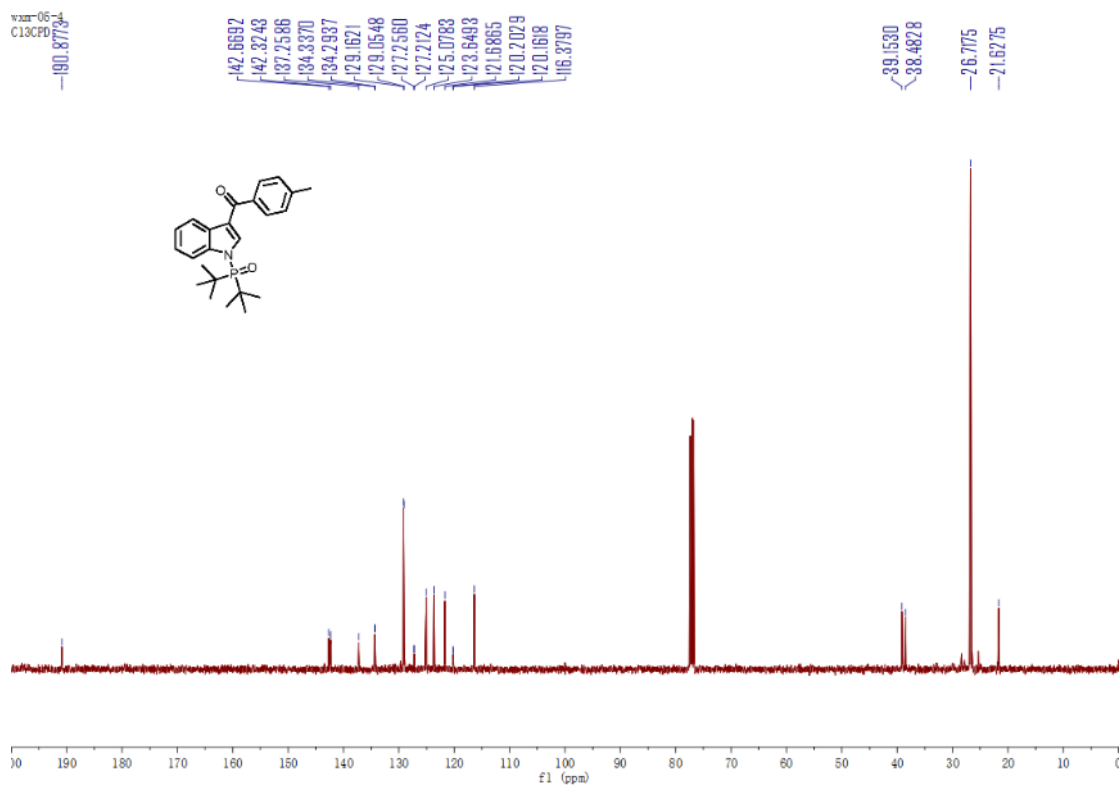

<sup>31</sup>P NMR spectrum (162 MHz, CDCl<sub>3</sub>) of compound **3a**

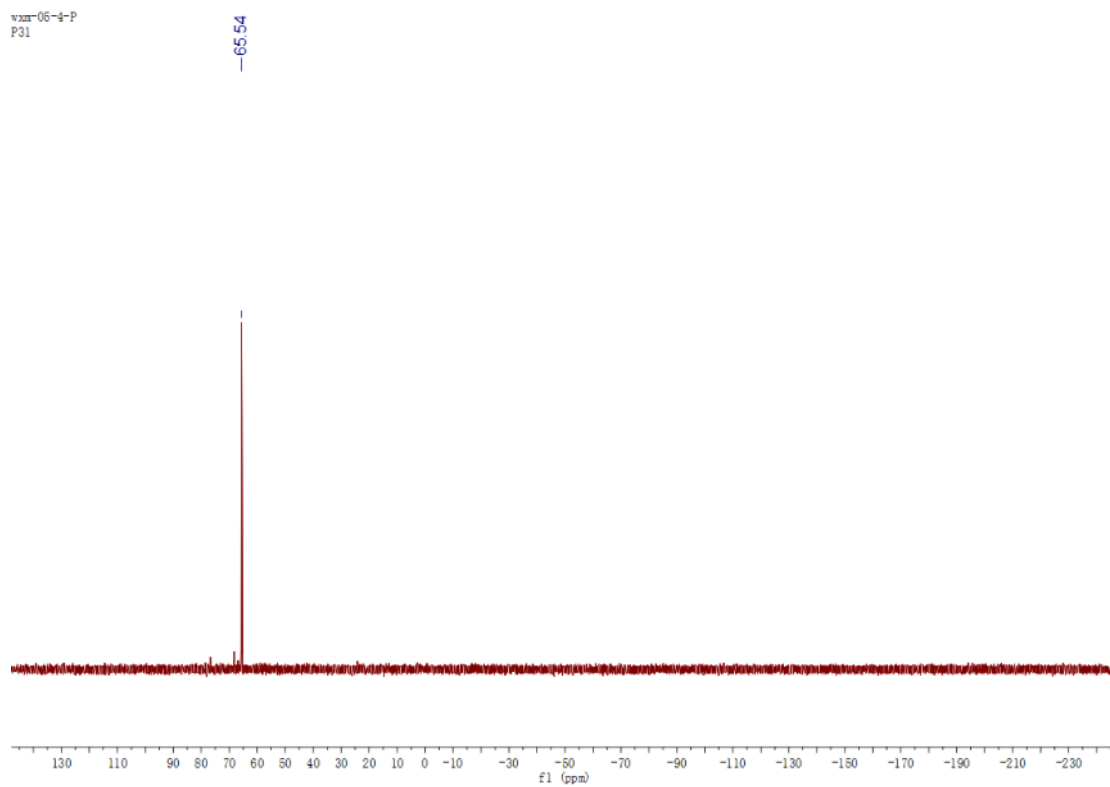

<sup>1</sup>H NMR spectrum (400 MHz, CDCl<sub>3</sub>) of compound **3b**

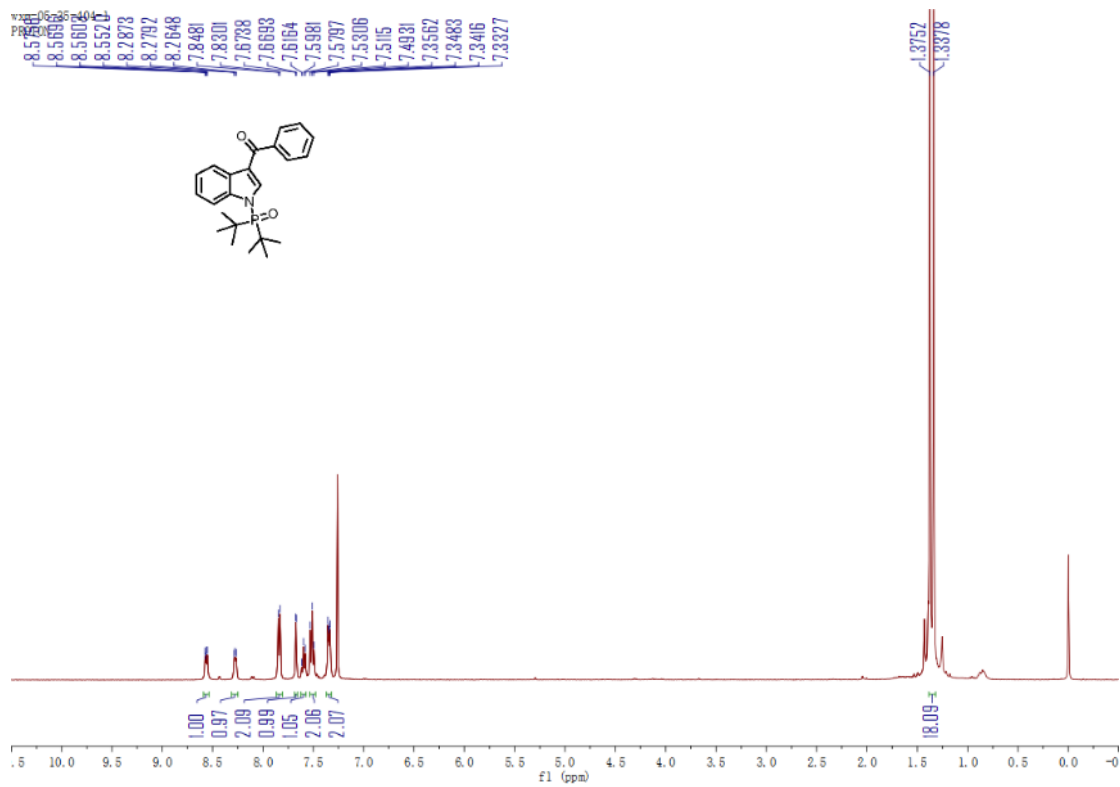

<sup>13</sup>C NMR spectrum (100 MHz, CDCl<sub>3</sub>) of compound **3b**

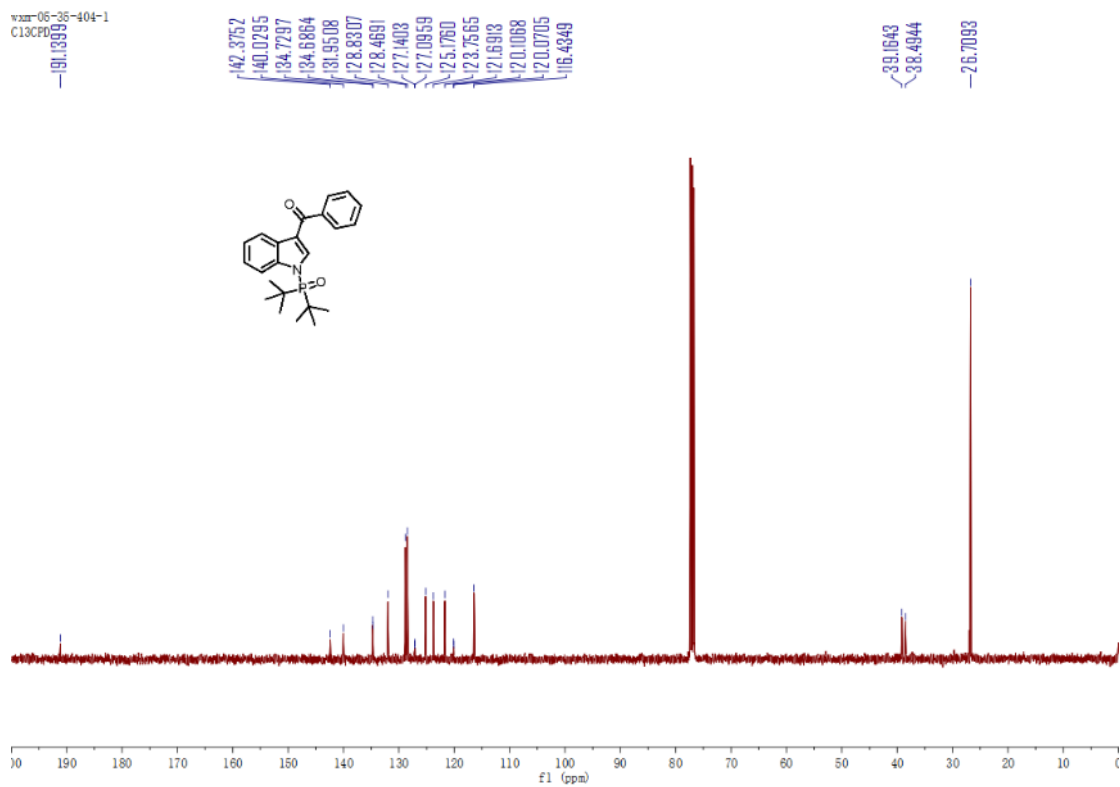

<sup>31</sup>P NMR spectrum (162 MHz, CDCl<sub>3</sub>) of compound **3b**

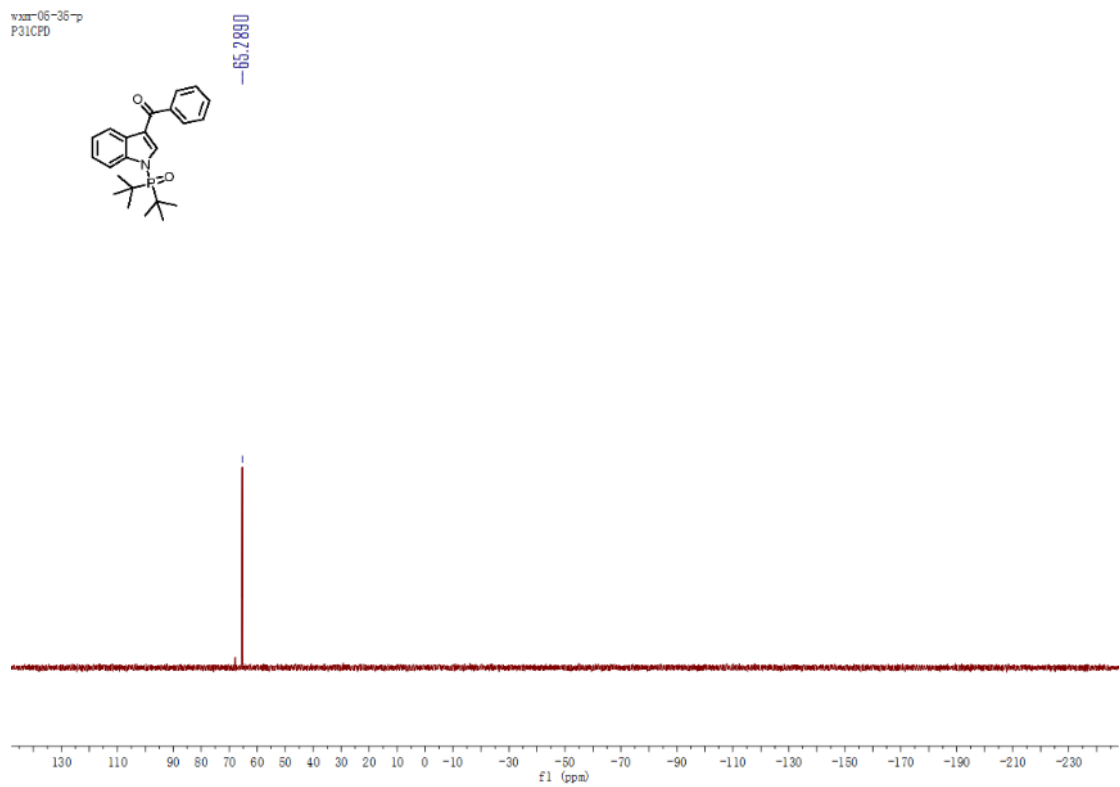

<sup>1</sup>H NMR spectrum (400 MHz, CDCl<sub>3</sub>) of compound **3c**

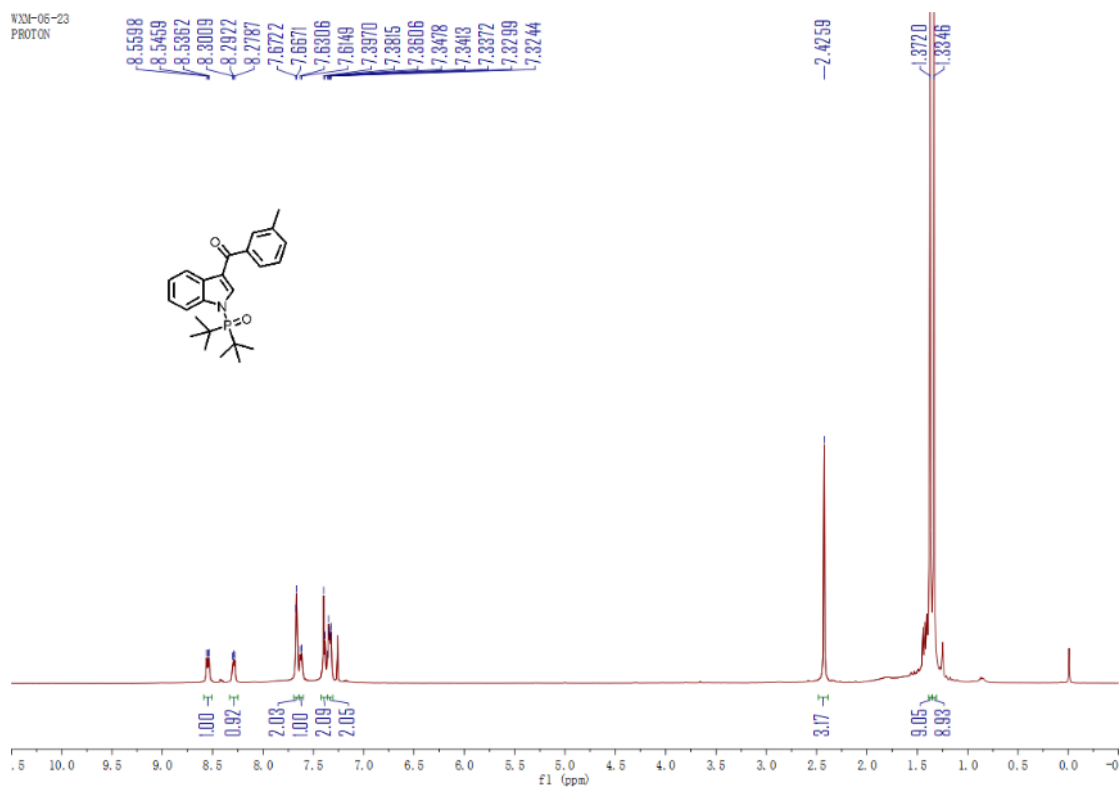

<sup>13</sup>C NMR spectrum (100 MHz, CDCl<sub>3</sub>) of compound **3c**

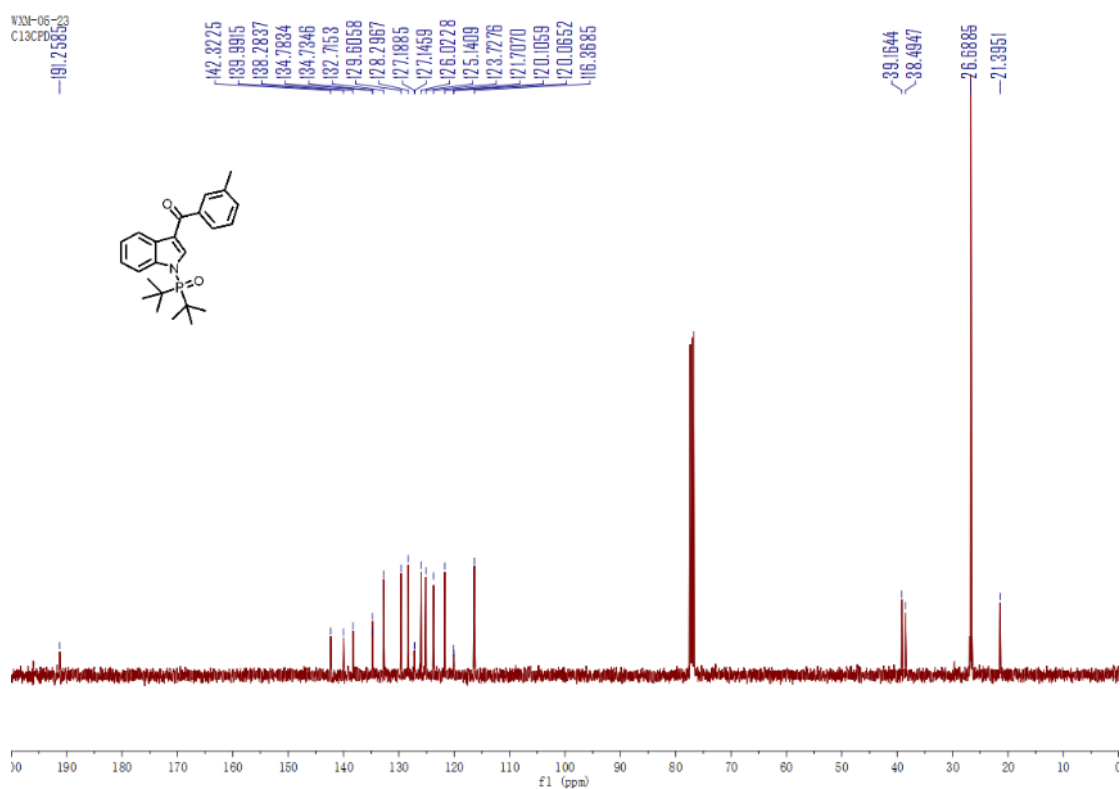

<sup>31</sup>P NMR spectrum (162 MHz, CDCl<sub>3</sub>) of compound **3c**

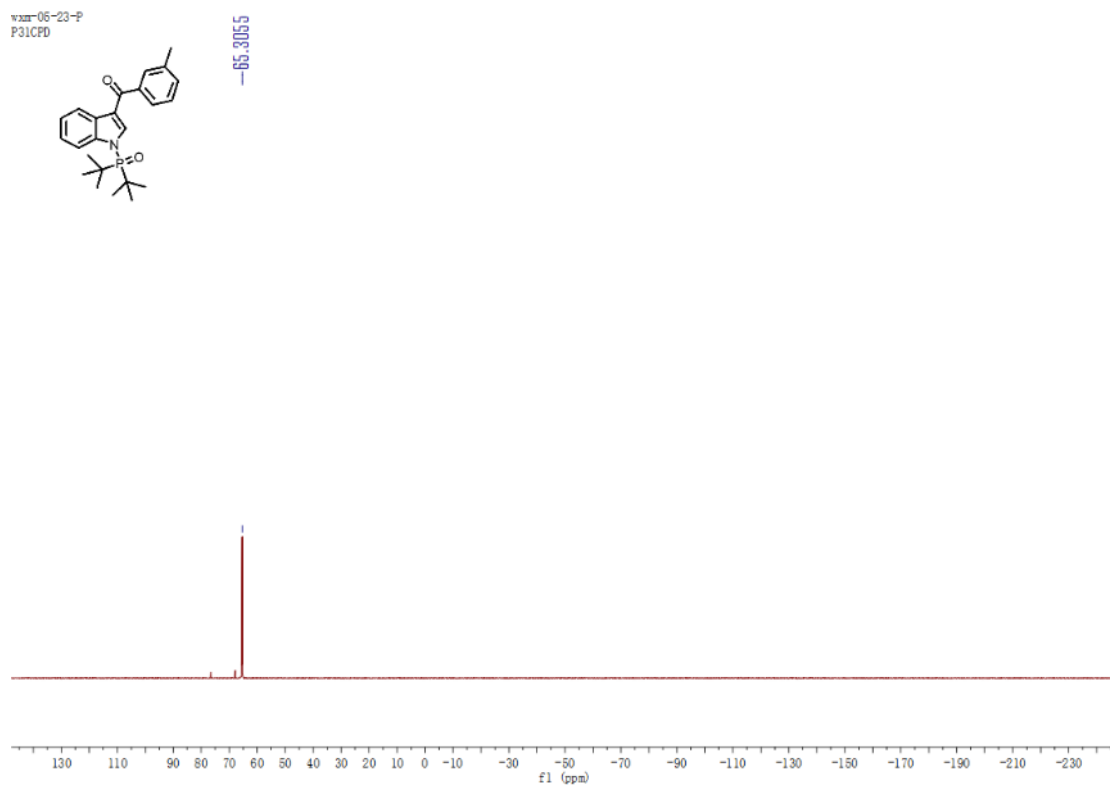

<sup>1</sup>H NMR spectrum (400 MHz, CDCl<sub>3</sub>) of compound **3d**

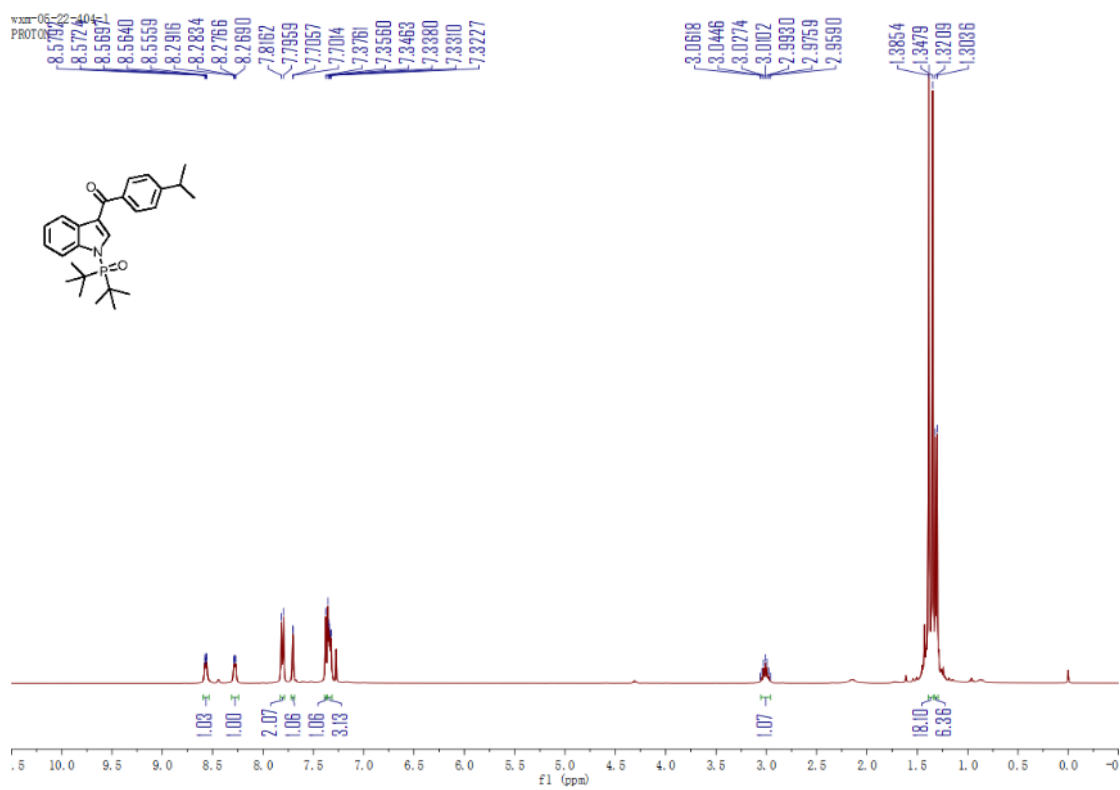

<sup>13</sup>C NMR spectrum (100 MHz, CDCl<sub>3</sub>) of compound **3d**

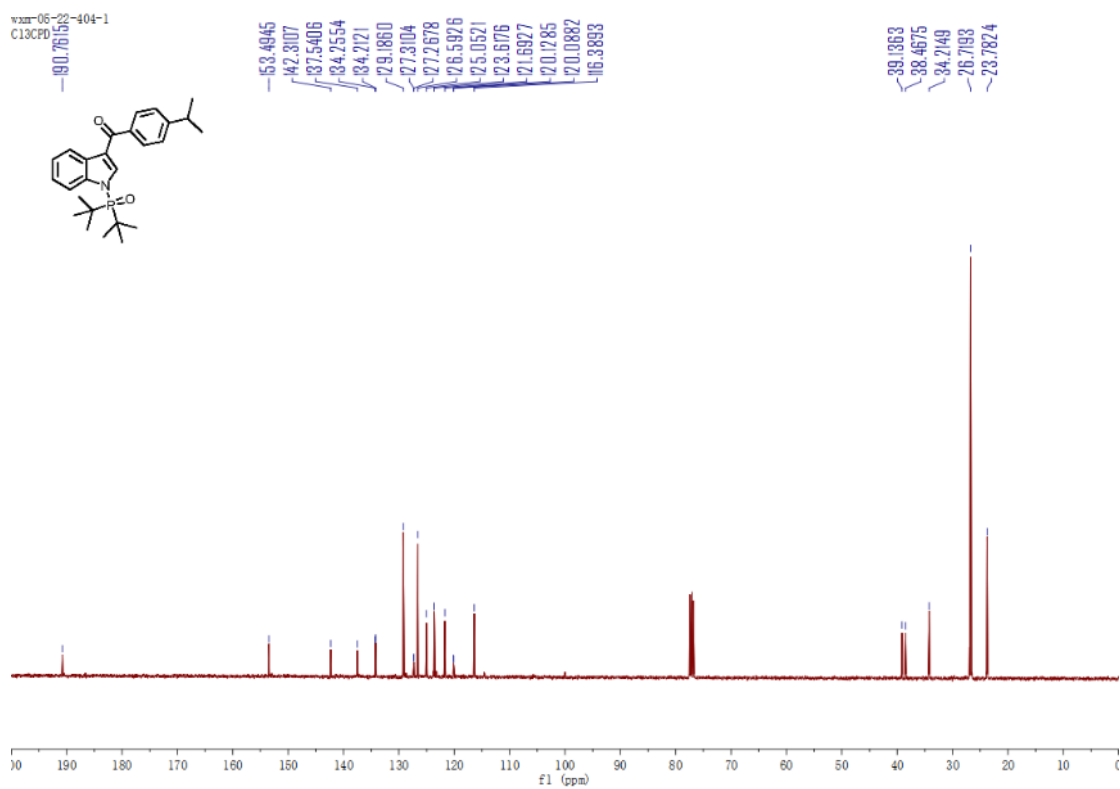

<sup>31</sup>P NMR spectrum (162 MHz, CDCl<sub>3</sub>) of compound **3d**

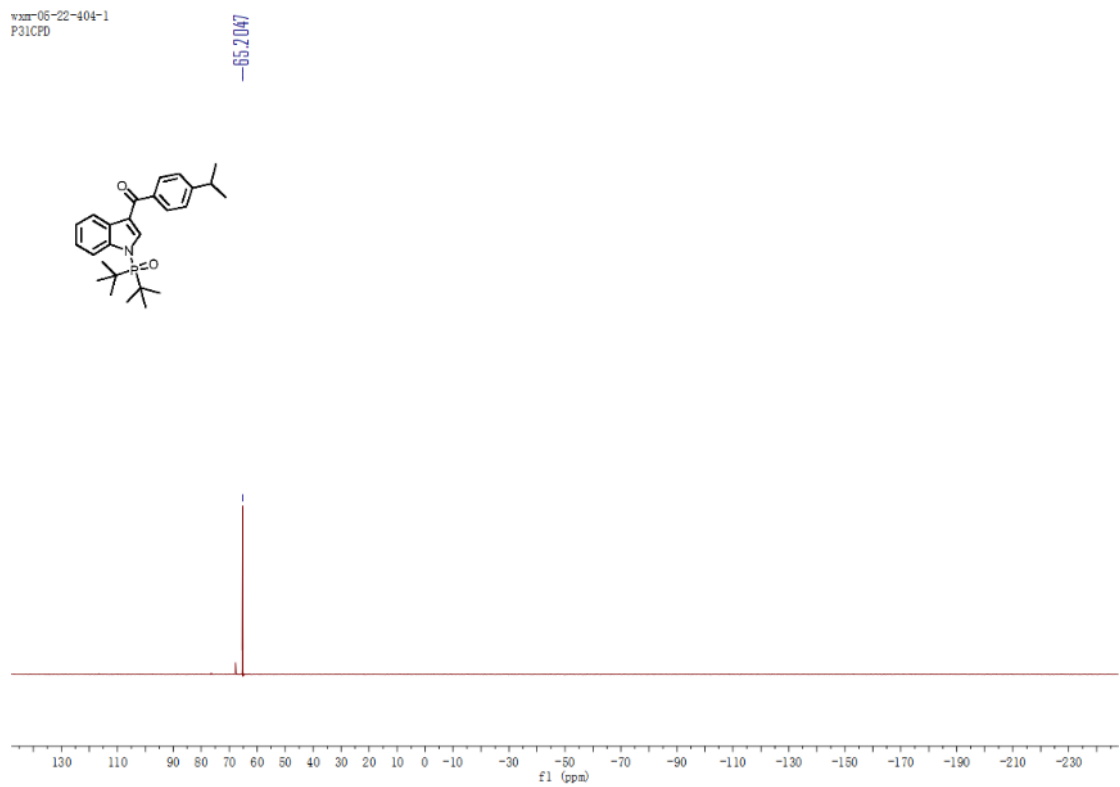



<sup>1</sup>H NMR spectrum (400 MHz, CDCl<sub>3</sub>) of compound **3e**

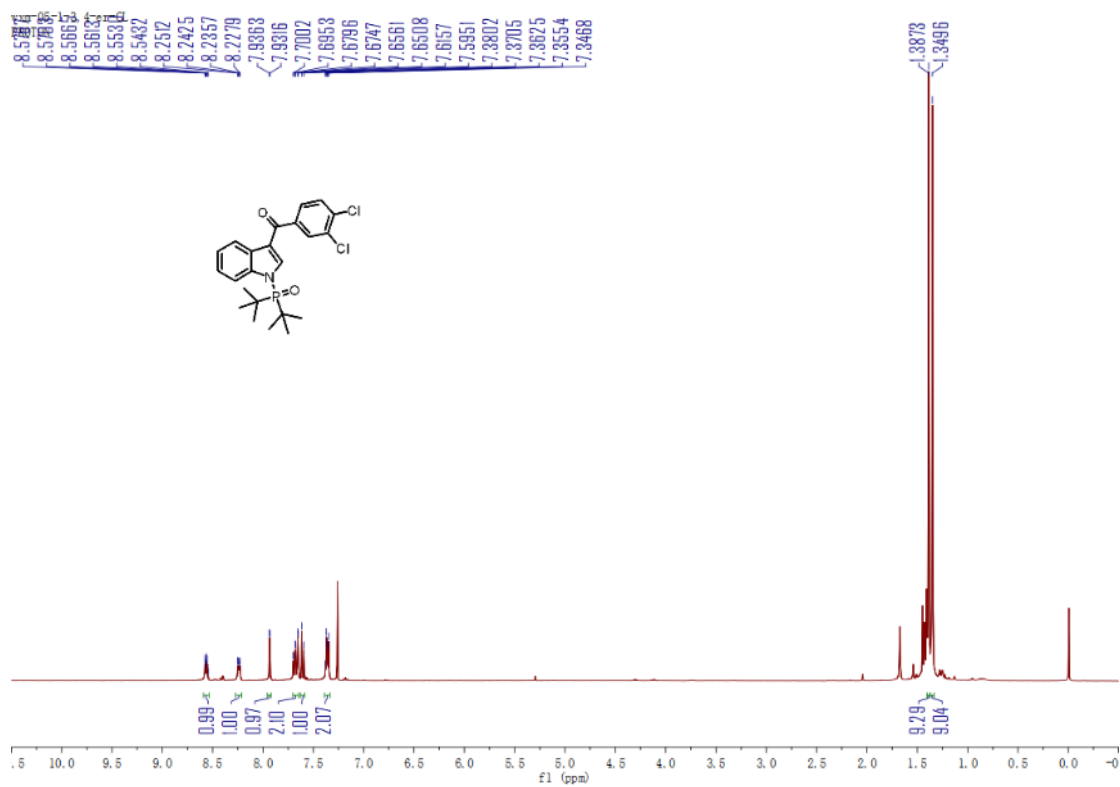

<sup>13</sup>C NMR spectrum (100 MHz, CDCl<sub>3</sub>) of compound **3e**

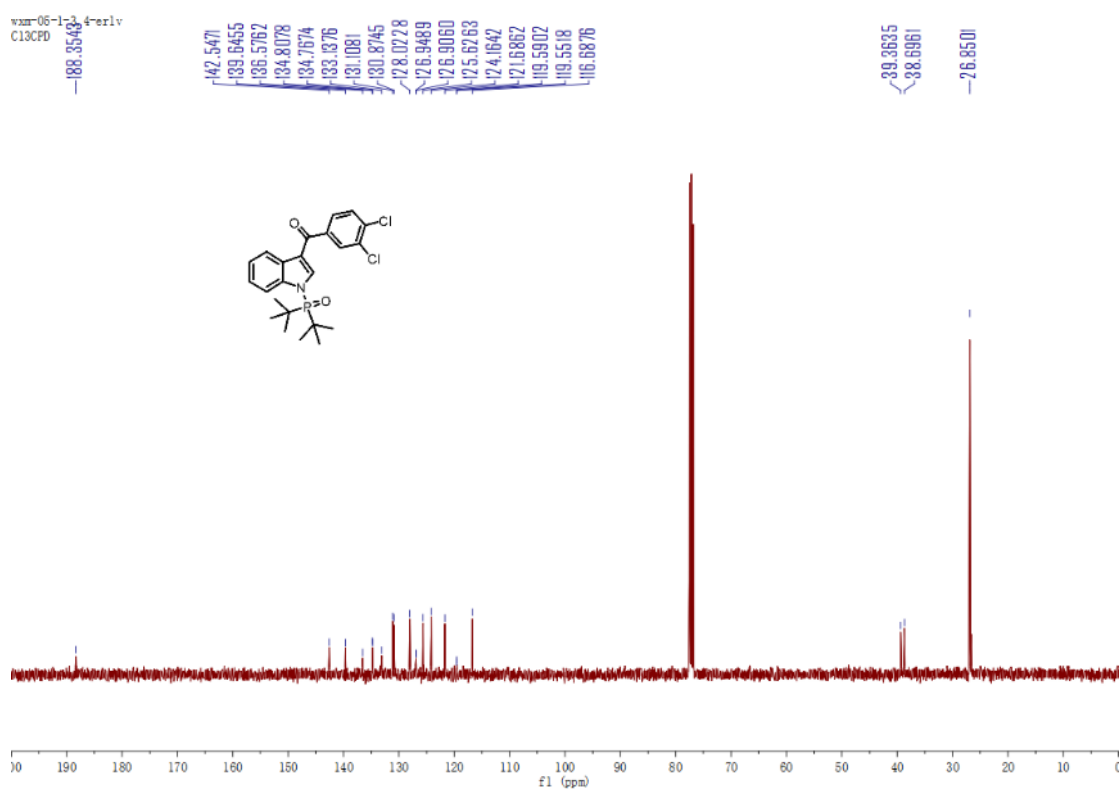

<sup>31</sup>P NMR spectrum (162 MHz, CDCl<sub>3</sub>) of compound **3e**

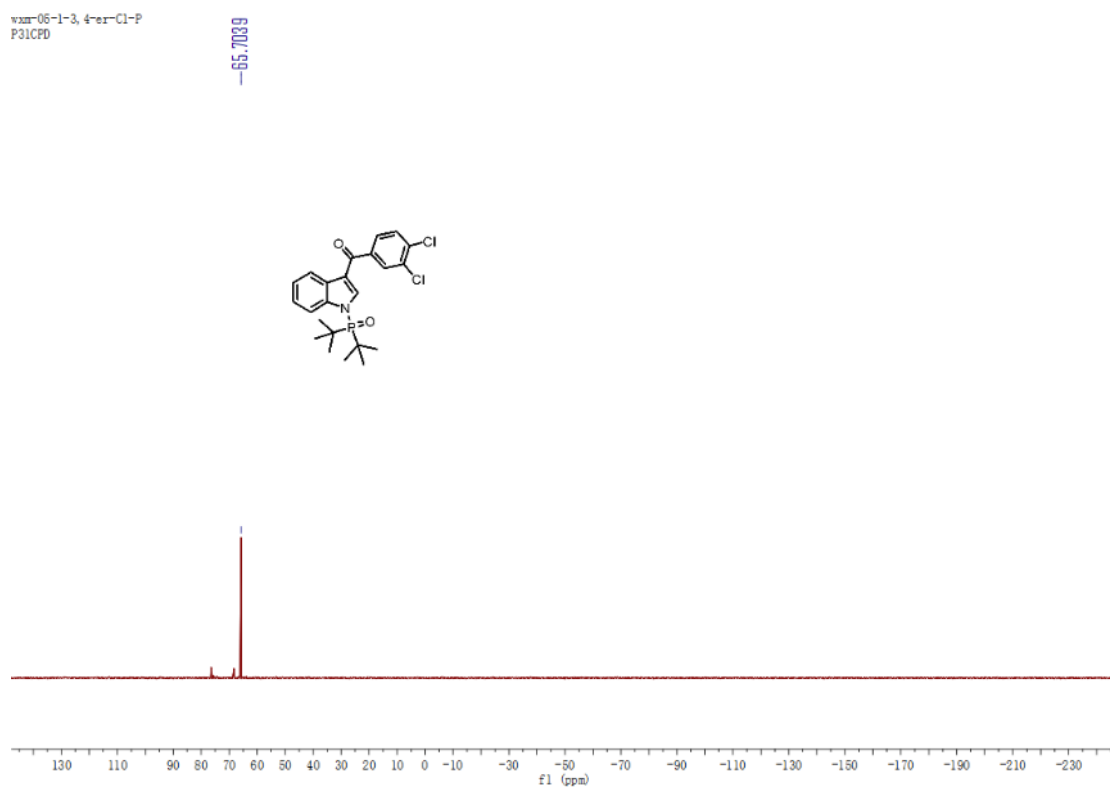

<sup>1</sup>H NMR spectrum (400 MHz, CDCl<sub>3</sub>) of compound **3f**

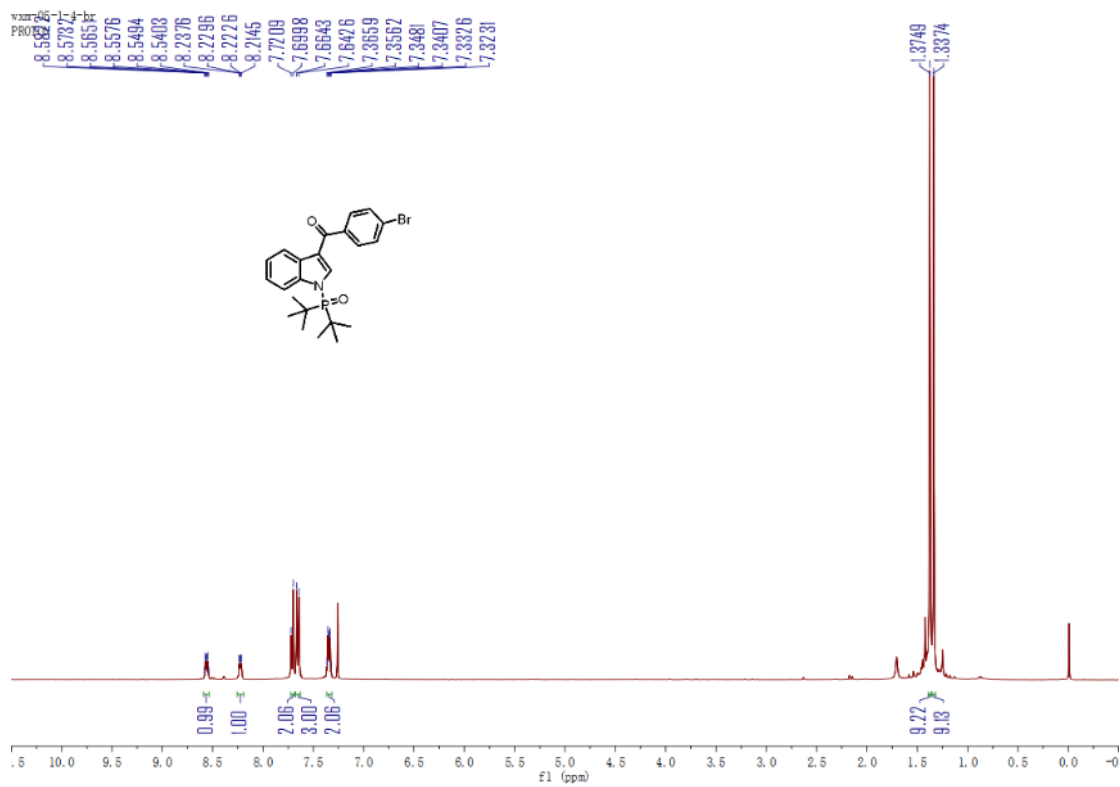

<sup>13</sup>C NMR spectrum (100 MHz, CDCl<sub>3</sub>) of compound **3f**

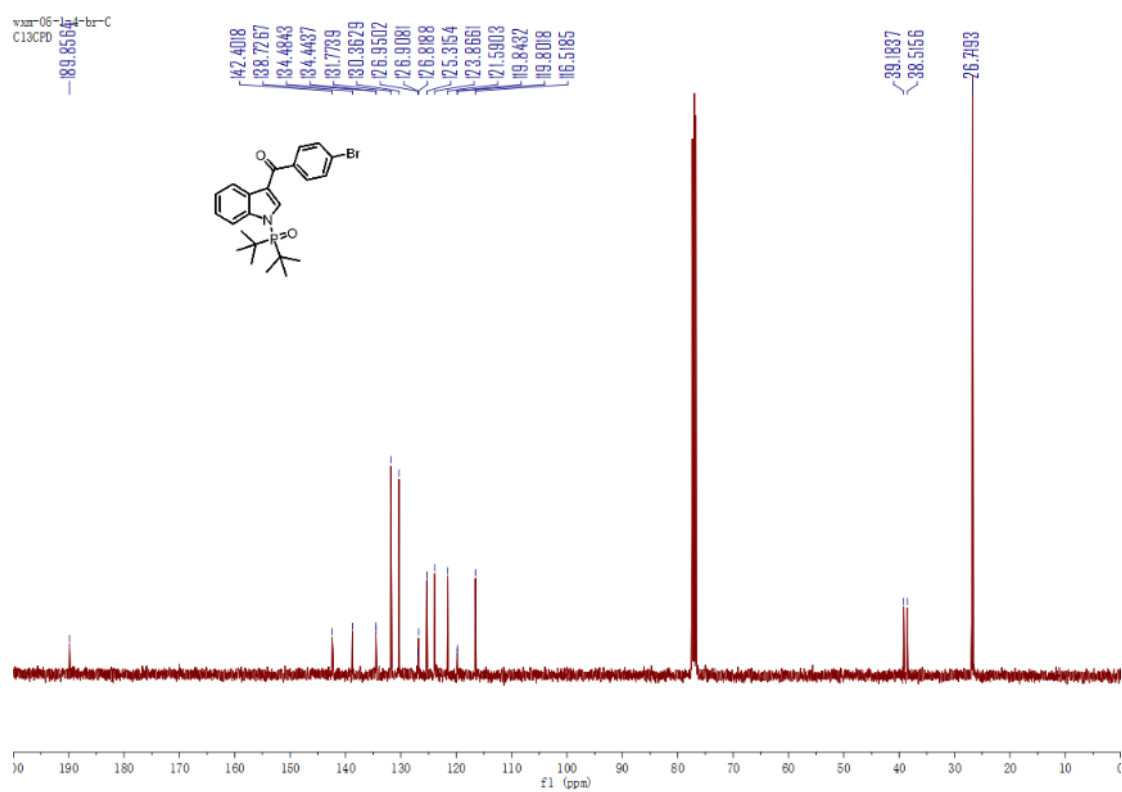

<sup>31</sup>P NMR spectrum (162 MHz, CDCl<sub>3</sub>) of compound **3f**

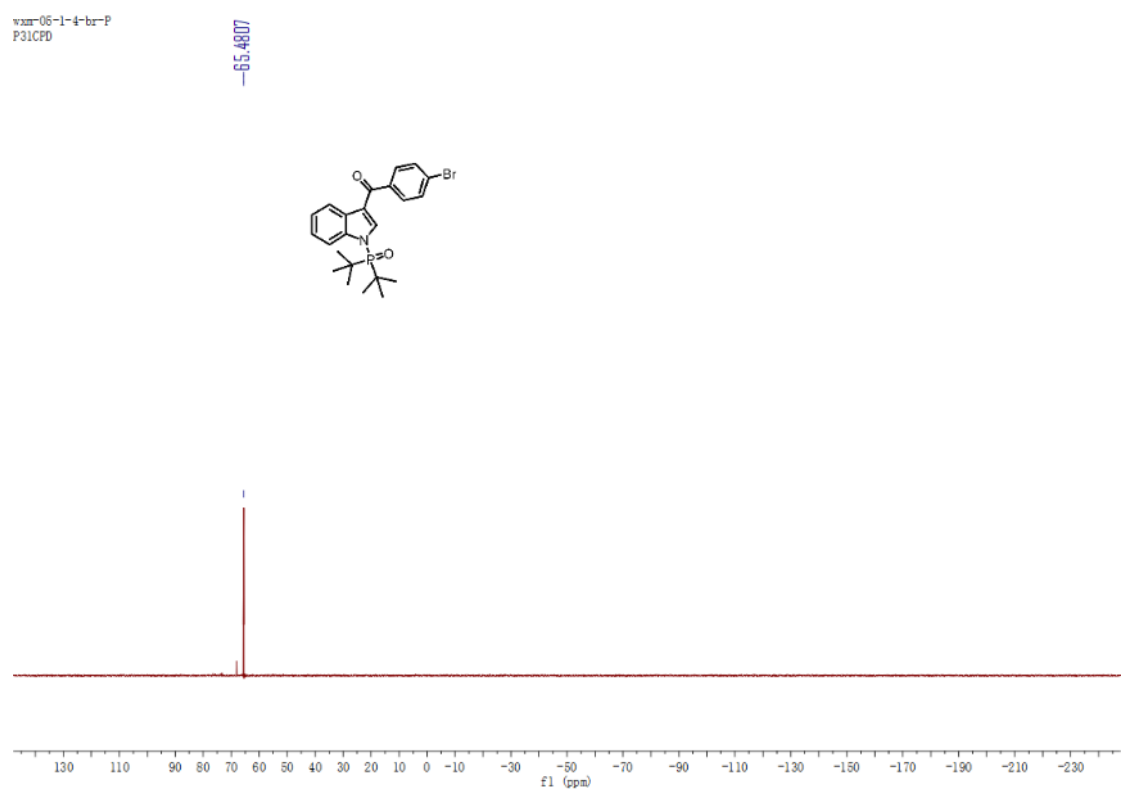

<sup>1</sup>H NMR spectrum (400 MHz, CDCl<sub>3</sub>) of compound **3g**

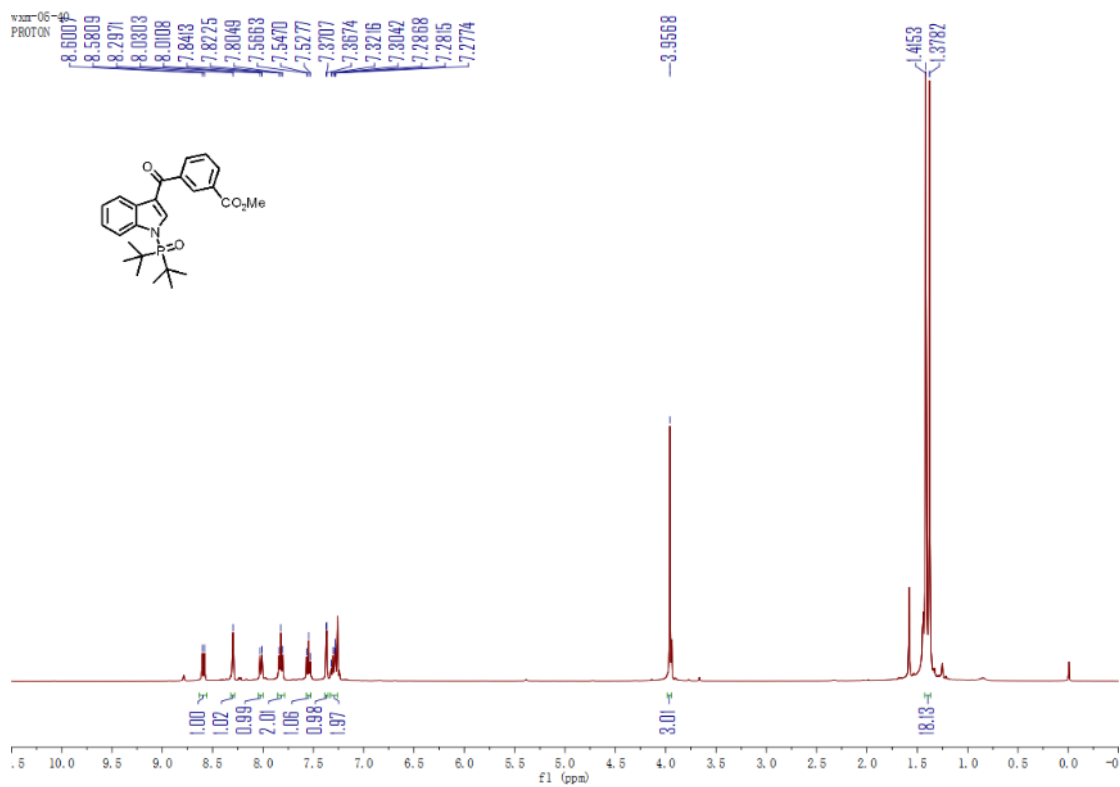

<sup>13</sup>C NMR spectrum (100 MHz, CDCl<sub>3</sub>) of compound **3g**

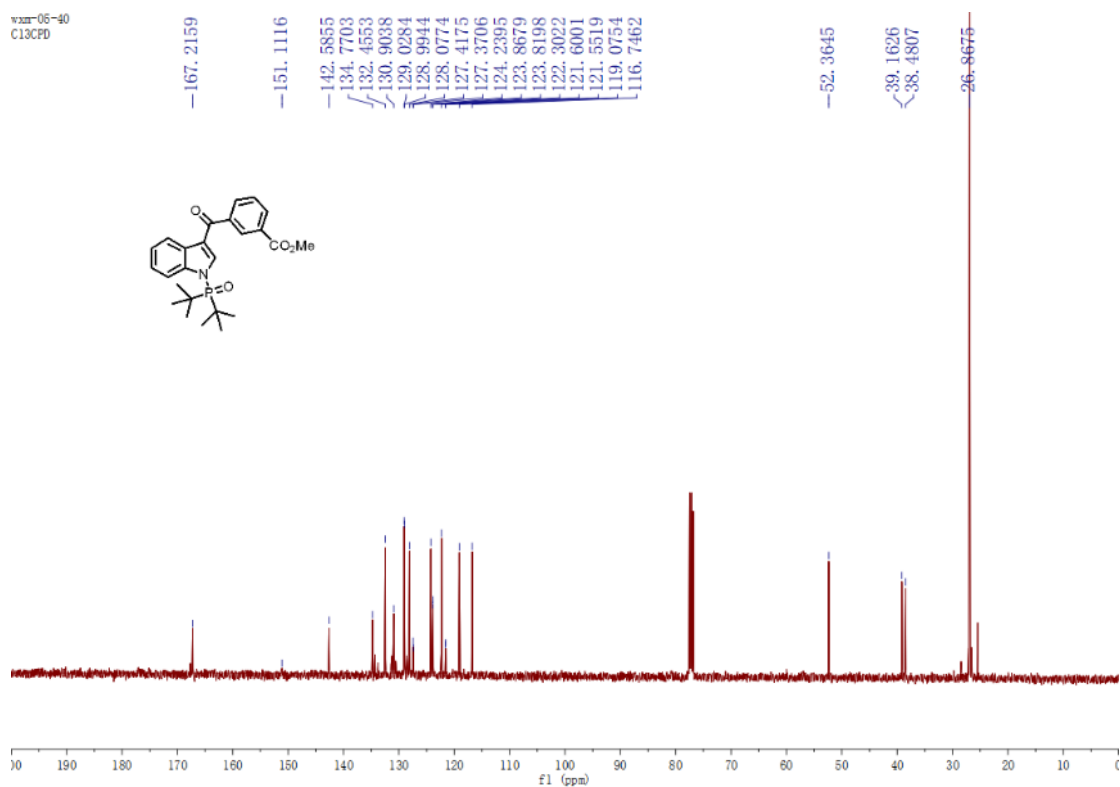

<sup>31</sup>P NMR spectrum (162 MHz, CDCl<sub>3</sub>) of compound **3g**

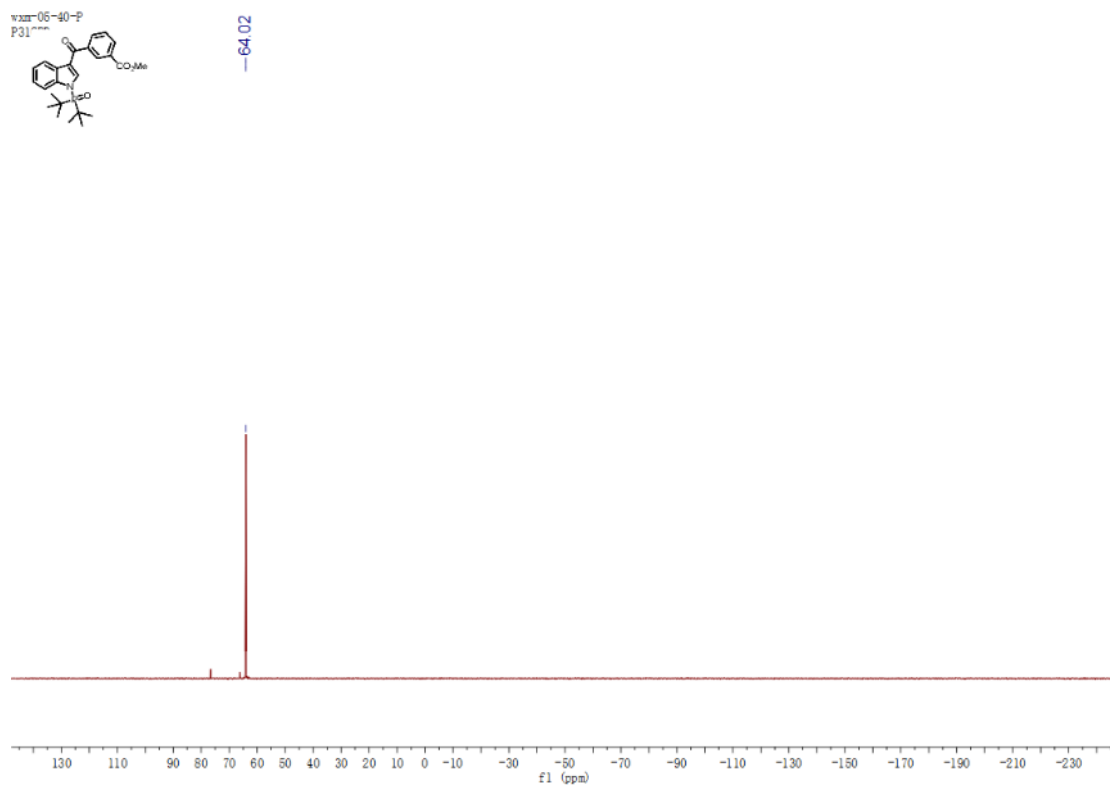

<sup>1</sup>H NMR spectrum (400 MHz, CDCl<sub>3</sub>) of compound **3h**

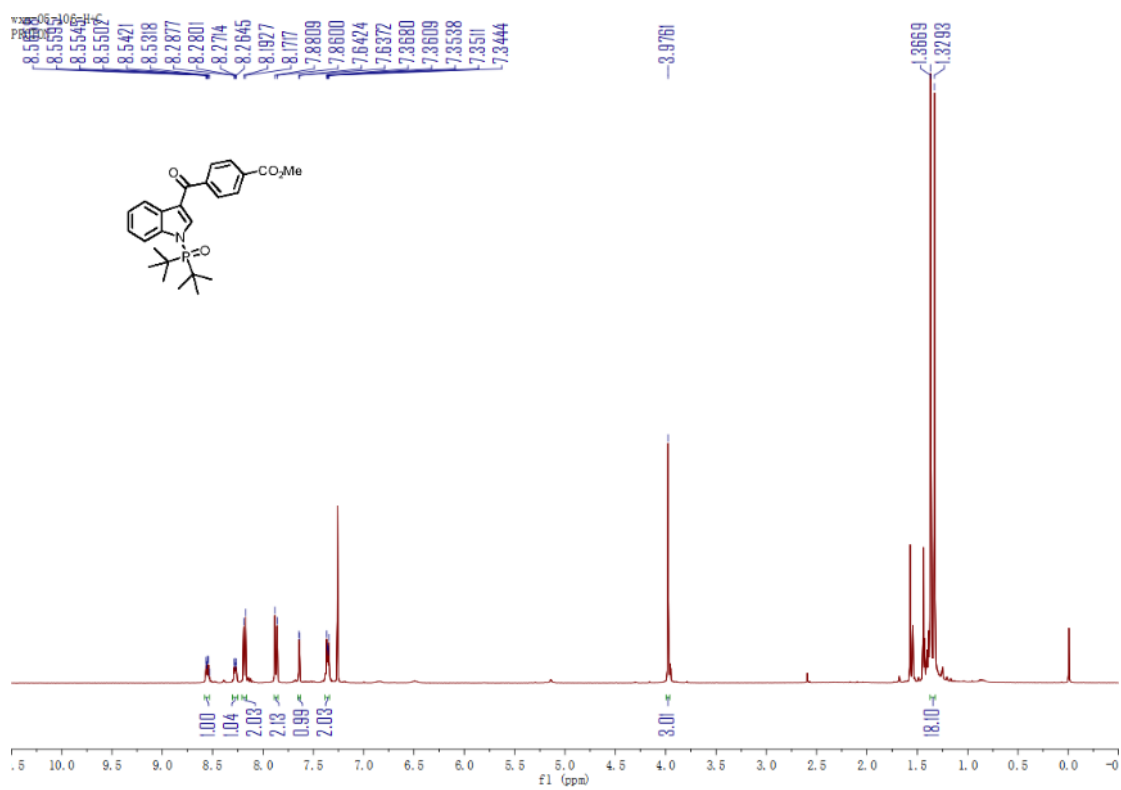

<sup>13</sup>C NMR spectrum (100 MHz, CDCl<sub>3</sub>) of compound **3h**

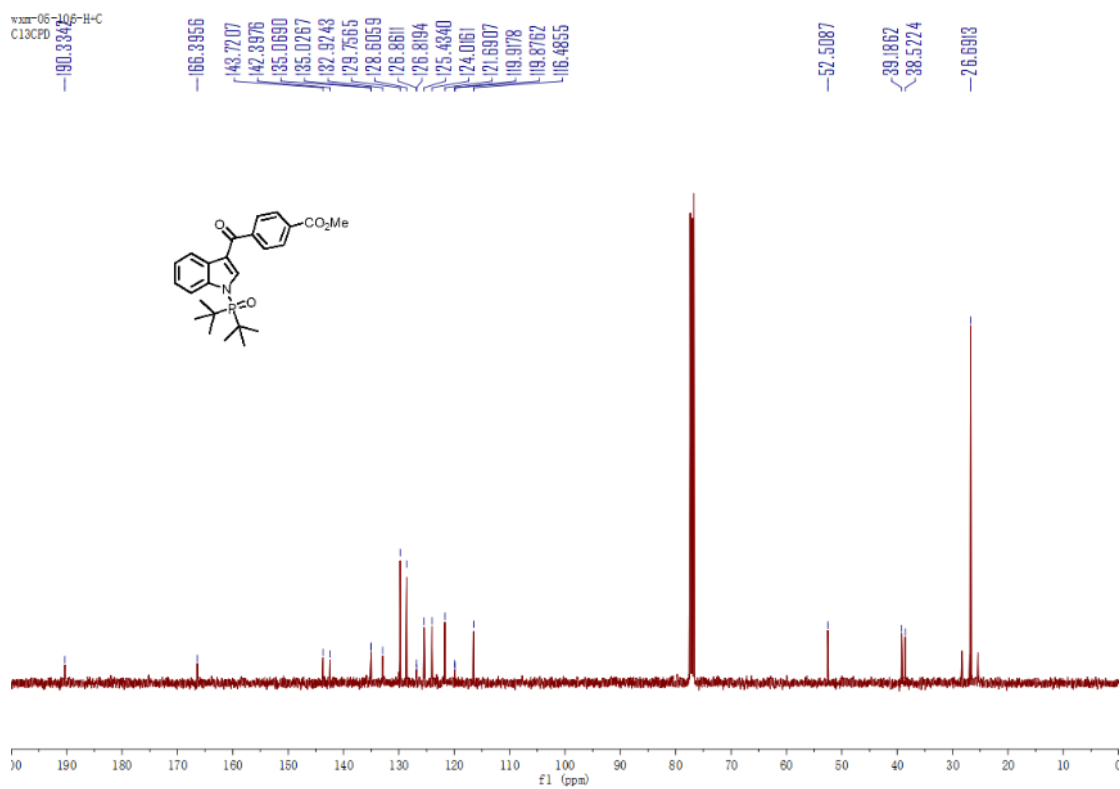

<sup>31</sup>P NMR spectrum (162 MHz, CDCl<sub>3</sub>) of compound **3h**

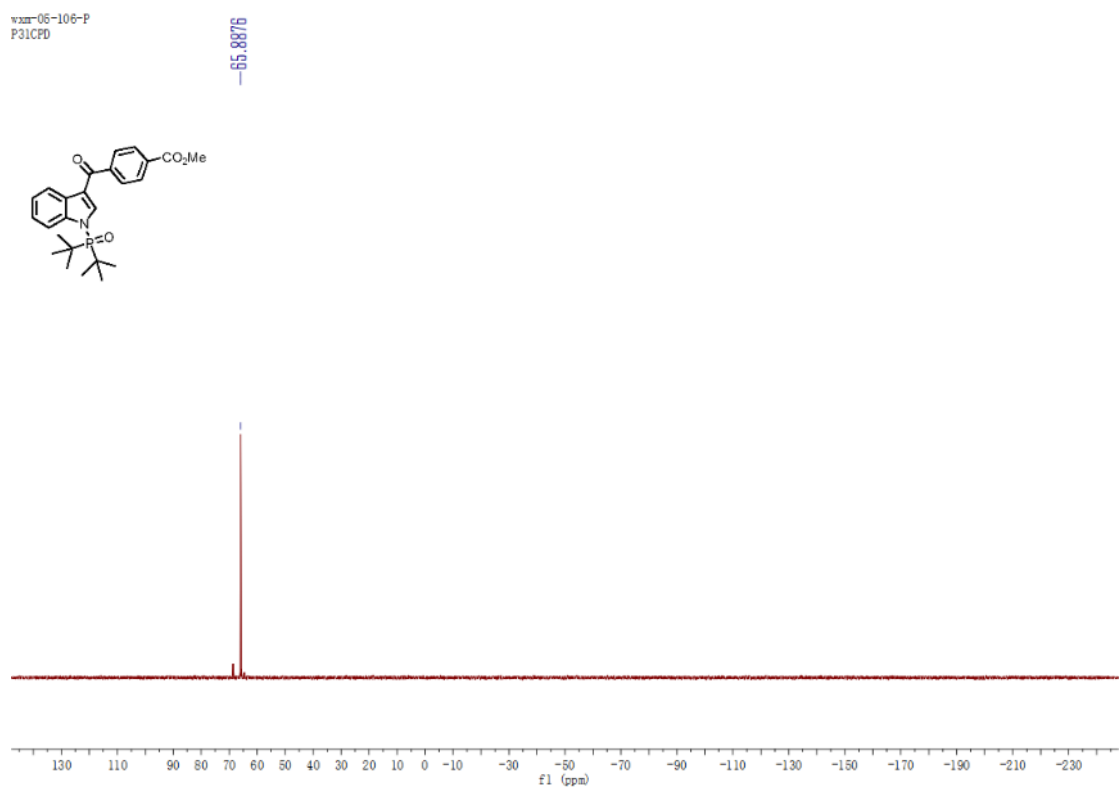

<sup>1</sup>H NMR spectrum (400 MHz, CDCl<sub>3</sub>) of compound **3i**

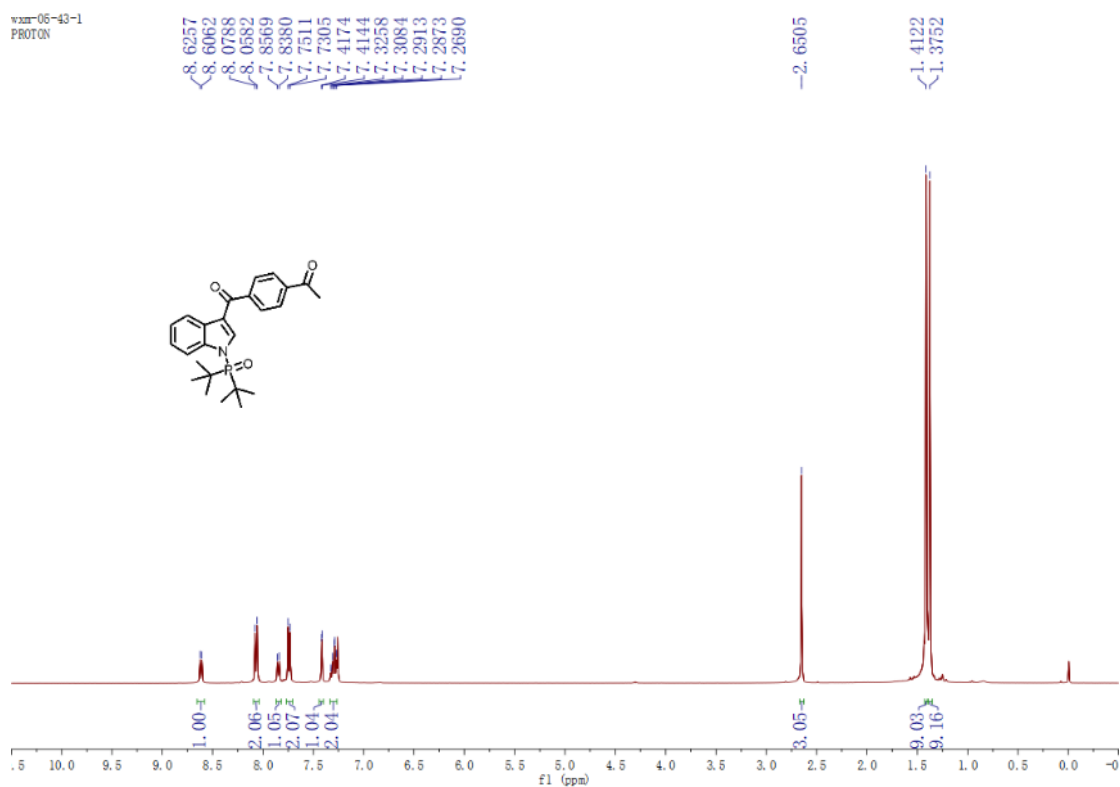

<sup>13</sup>C NMR spectrum (100 MHz, CDCl<sub>3</sub>) of compound **3i**

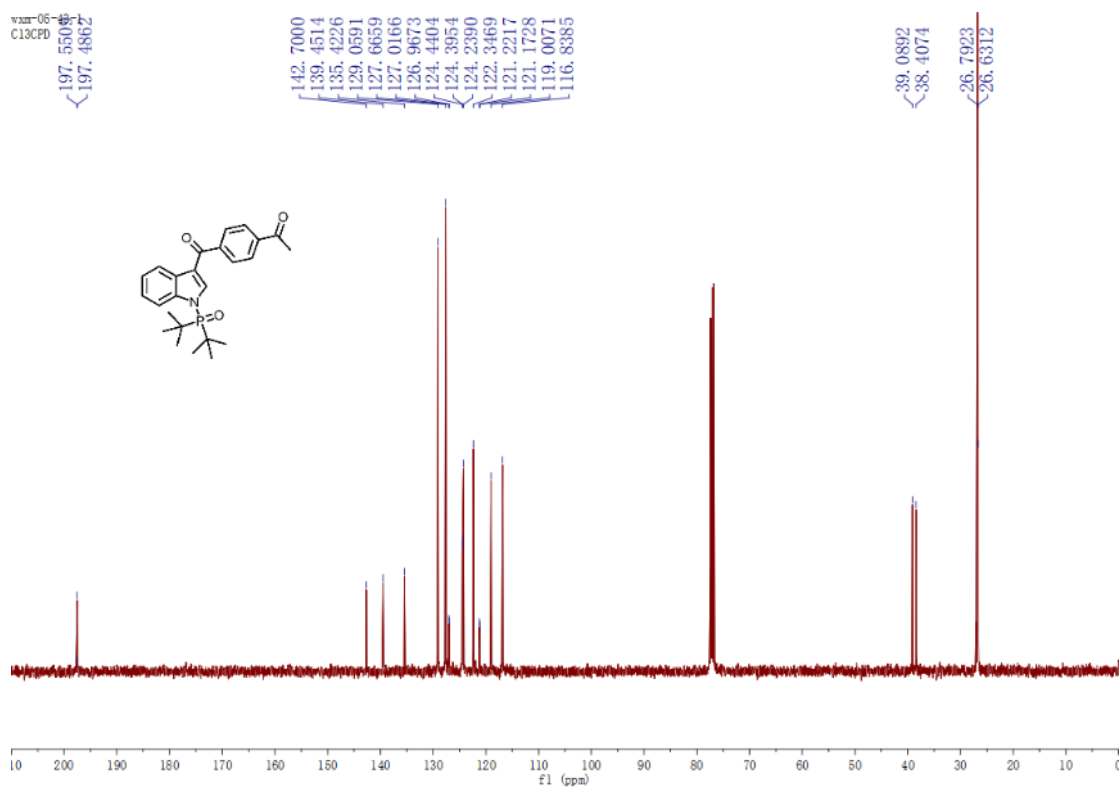

<sup>31</sup>P NMR spectrum (162 MHz, CDCl<sub>3</sub>) of compound **3i**

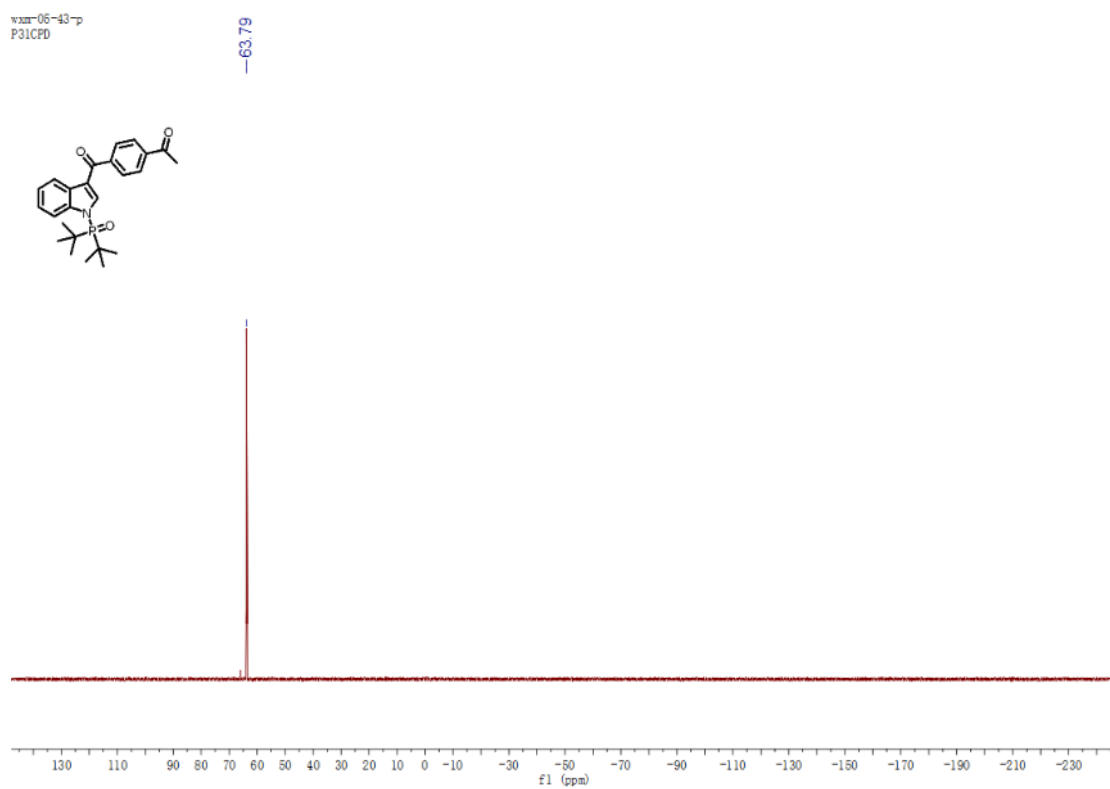

<sup>1</sup>H NMR spectrum (400 MHz, CDCl<sub>3</sub>) of compound **3j**

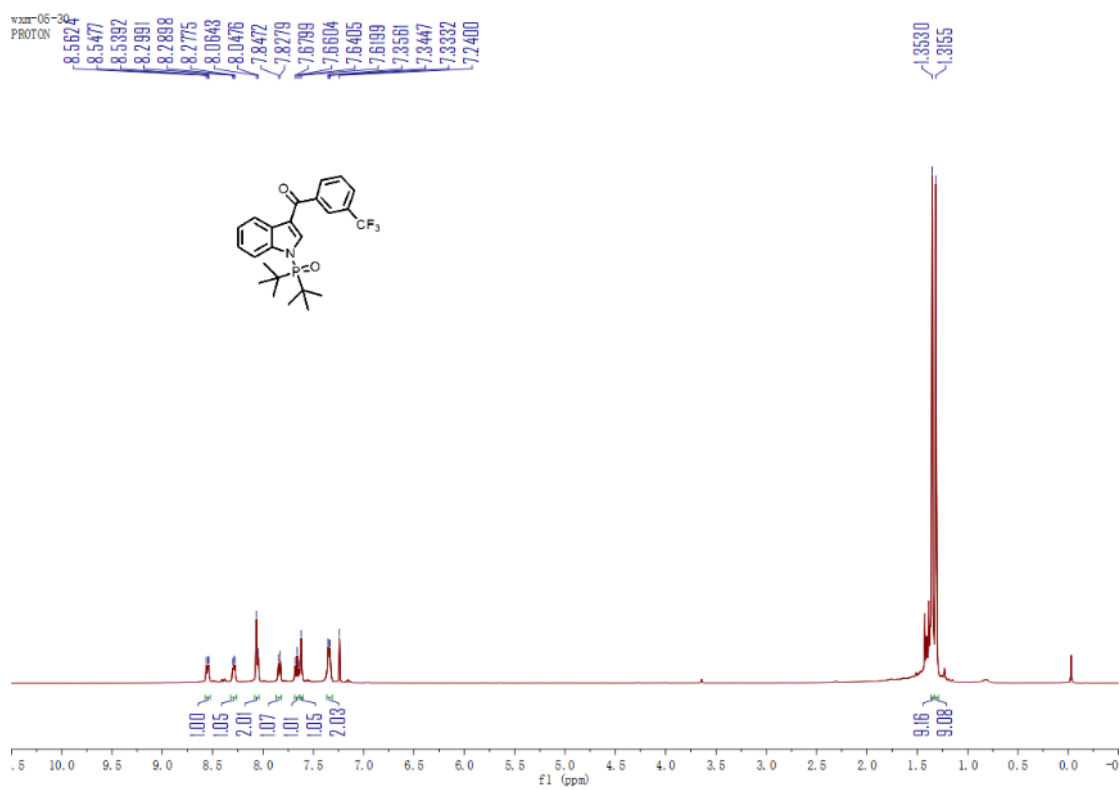



<sup>13</sup>C NMR spectrum (100 MHz, CDCl<sub>3</sub>) of compound **3j**

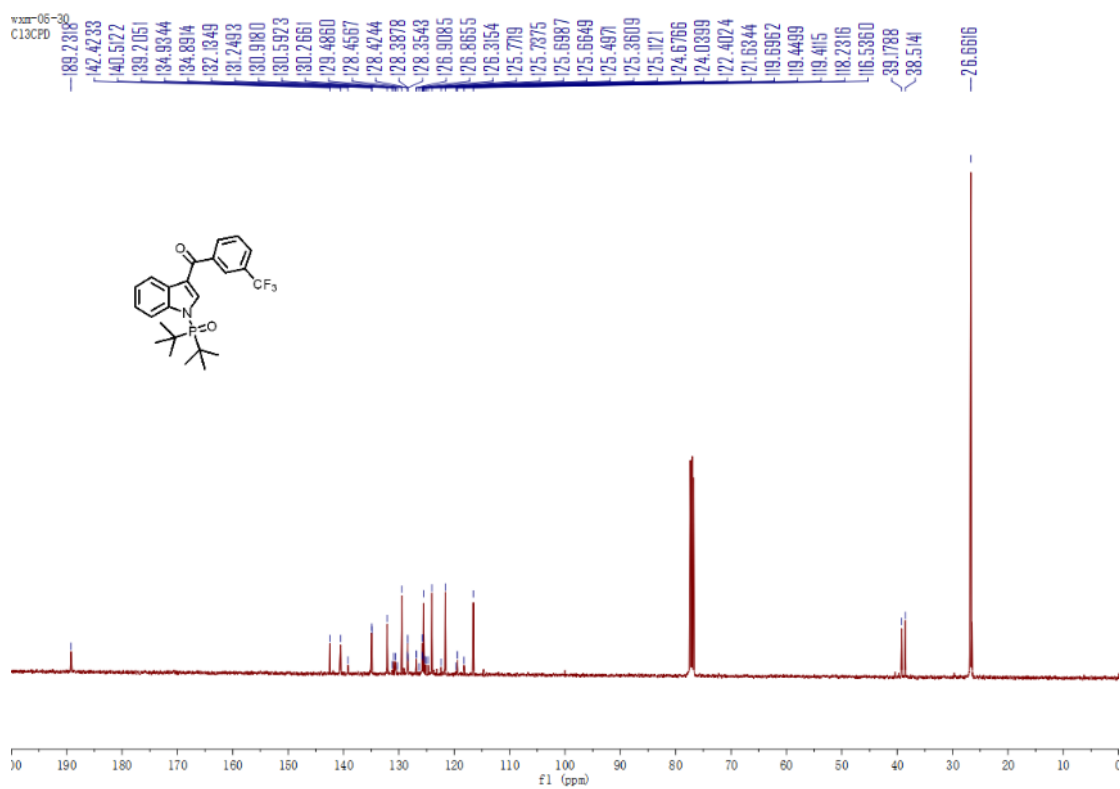

<sup>31</sup>P NMR spectrum (162 MHz, CDCl<sub>3</sub>) of compound **3j**

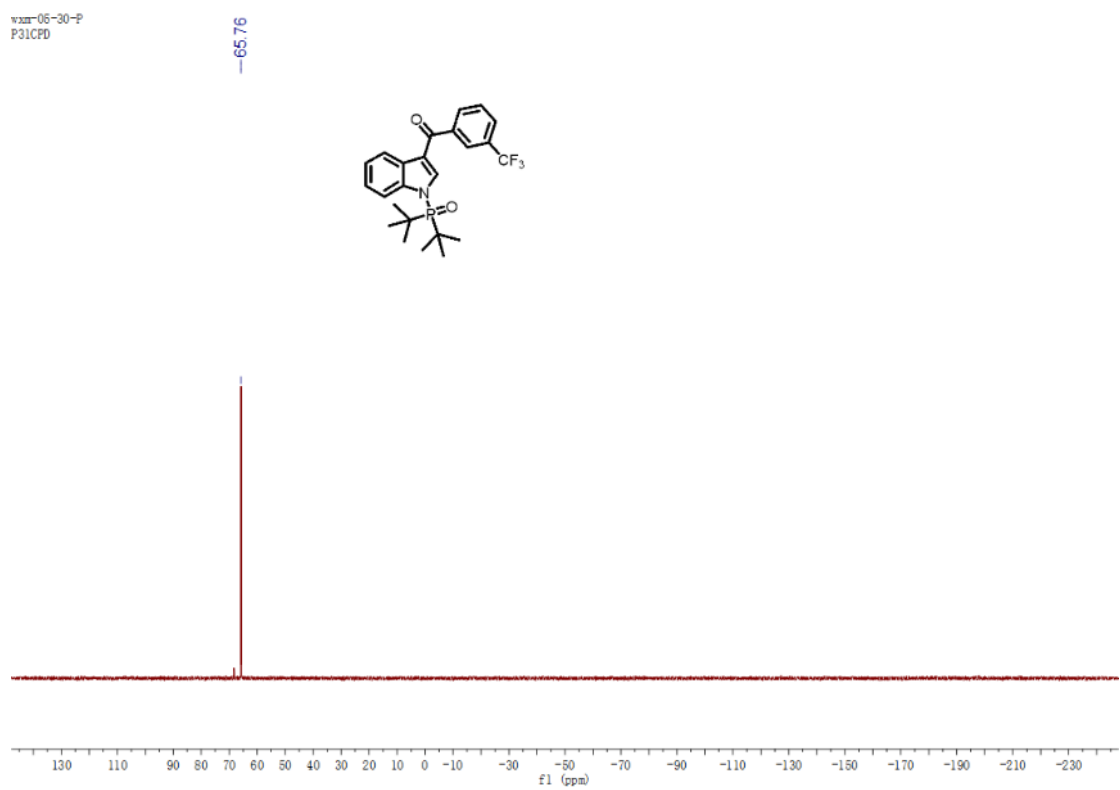

<sup>1</sup>H NMR spectrum (400 MHz, CDCl<sub>3</sub>) of compound **3k**

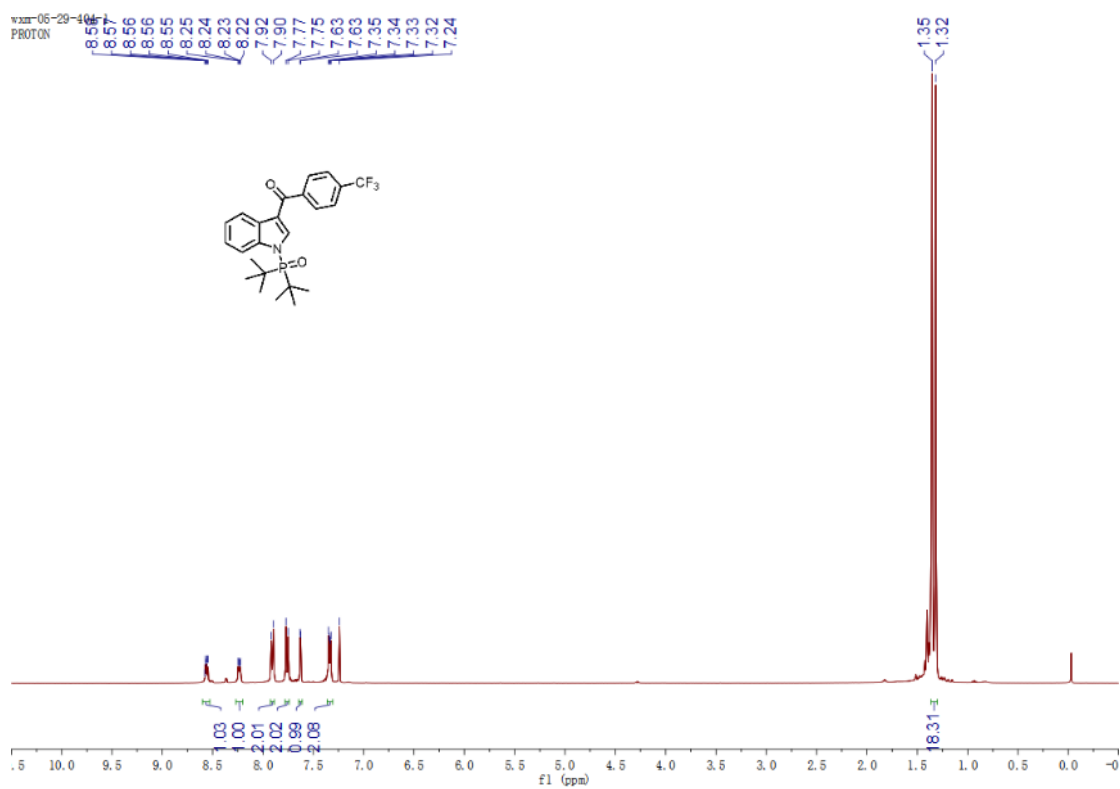

<sup>13</sup>C NMR spectrum (100 MHz, CDCl<sub>3</sub>) of compound **3k**

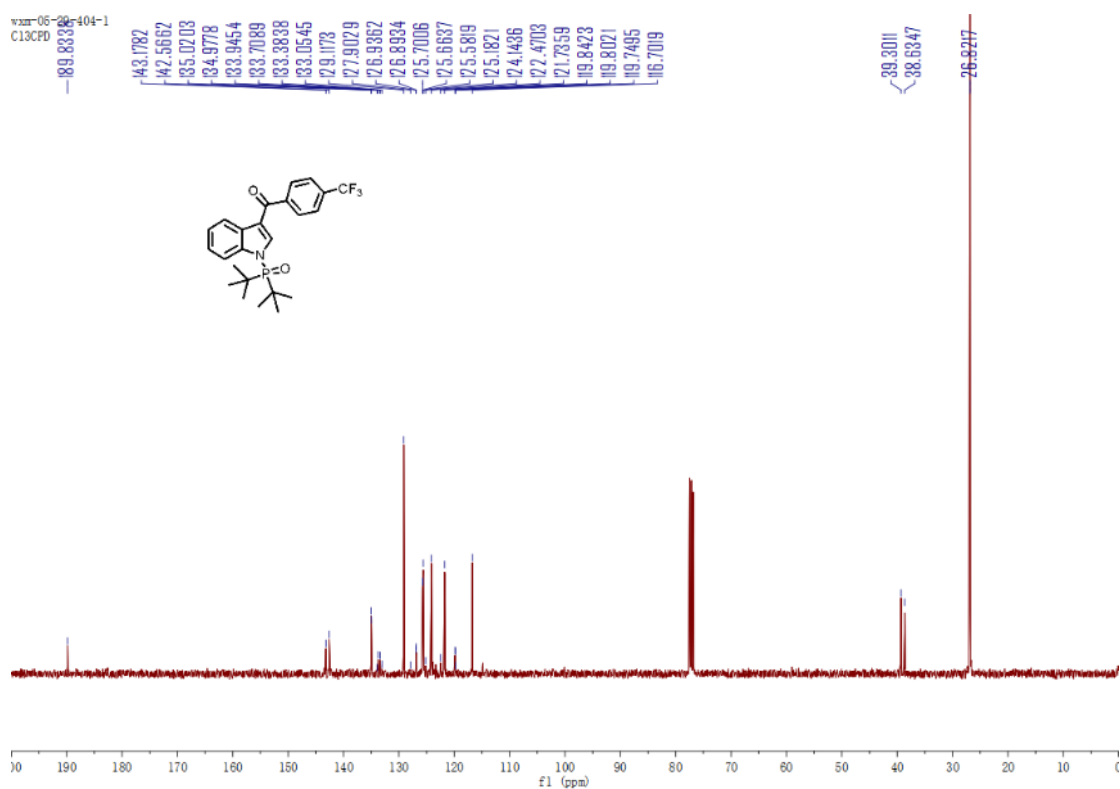

<sup>31</sup>P NMR spectrum (162 MHz, CDCl<sub>3</sub>) of compound **3k**

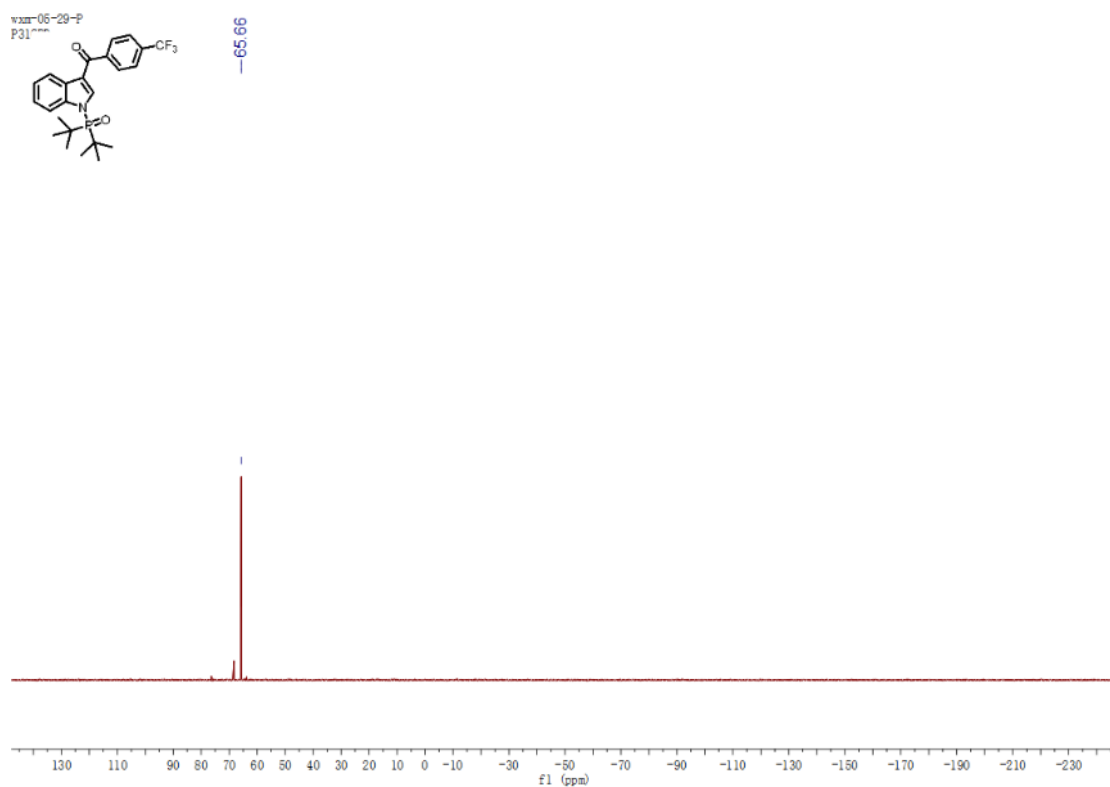

<sup>1</sup>H NMR spectrum (400 MHz, CDCl<sub>3</sub>) of compound **3l**

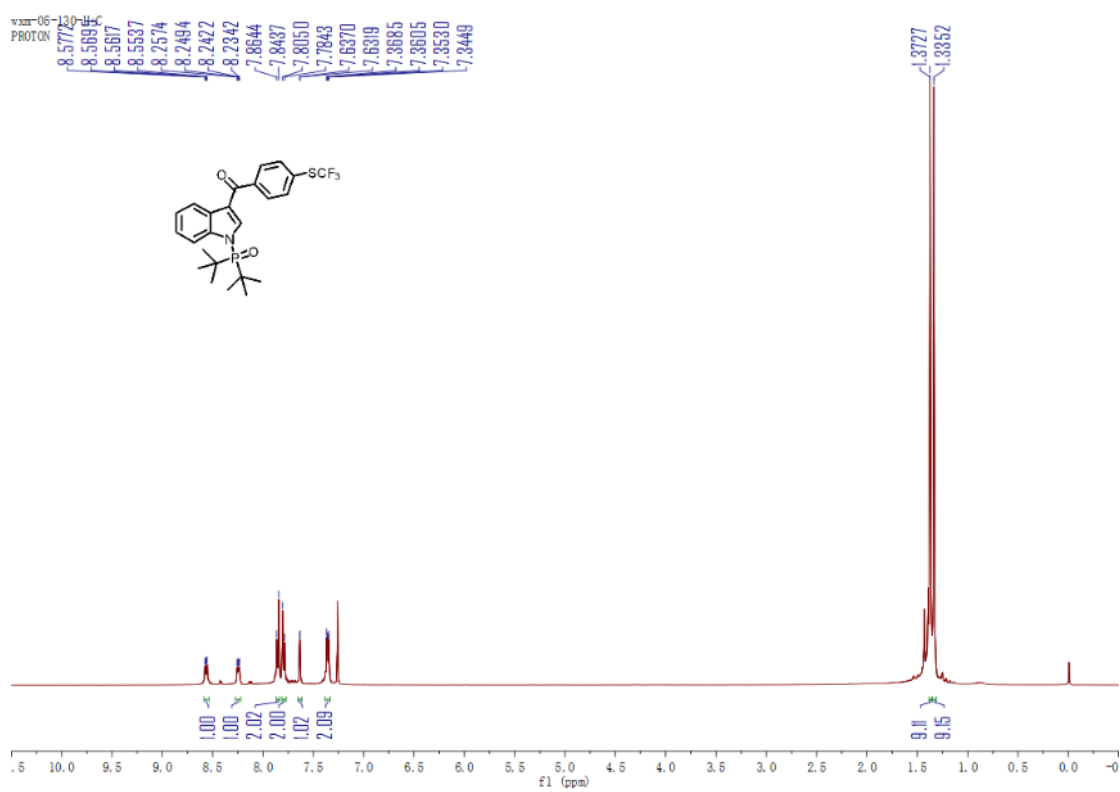

<sup>13</sup>C NMR spectrum (100 MHz, CDCl<sub>3</sub>) of compound **31**

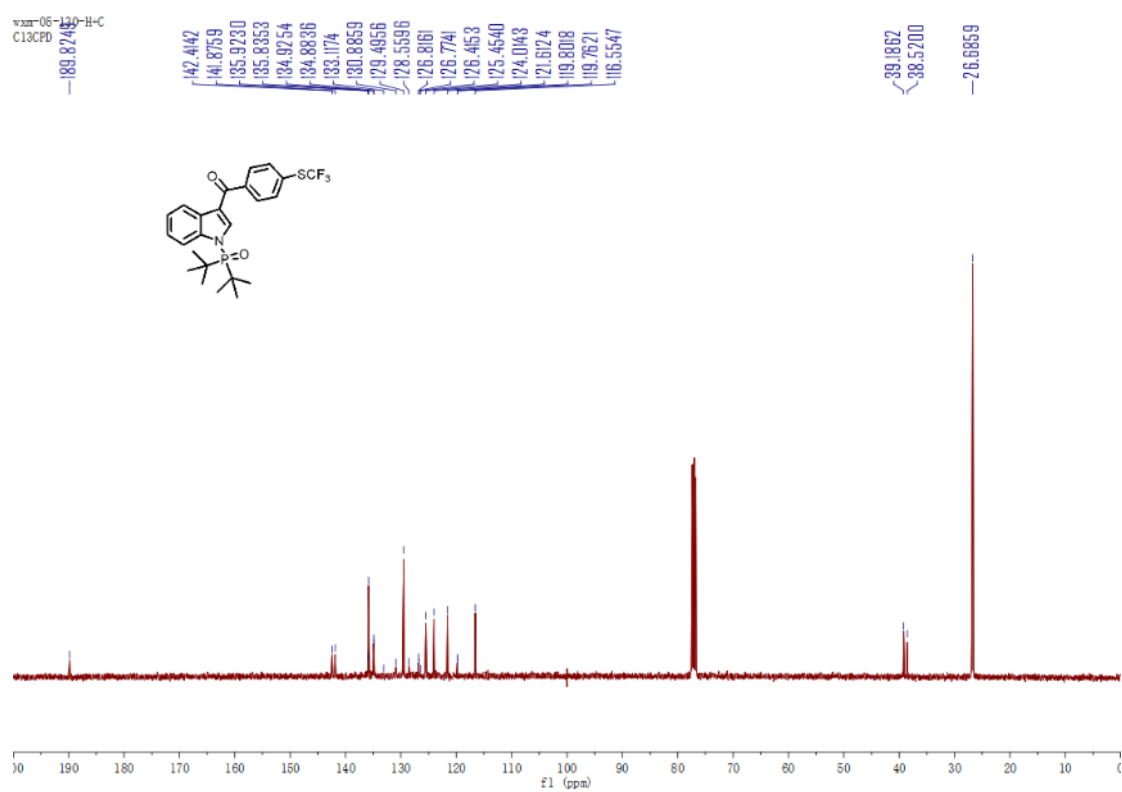

<sup>31</sup>P NMR spectrum (162 MHz, CDCl<sub>3</sub>) of compound **31**

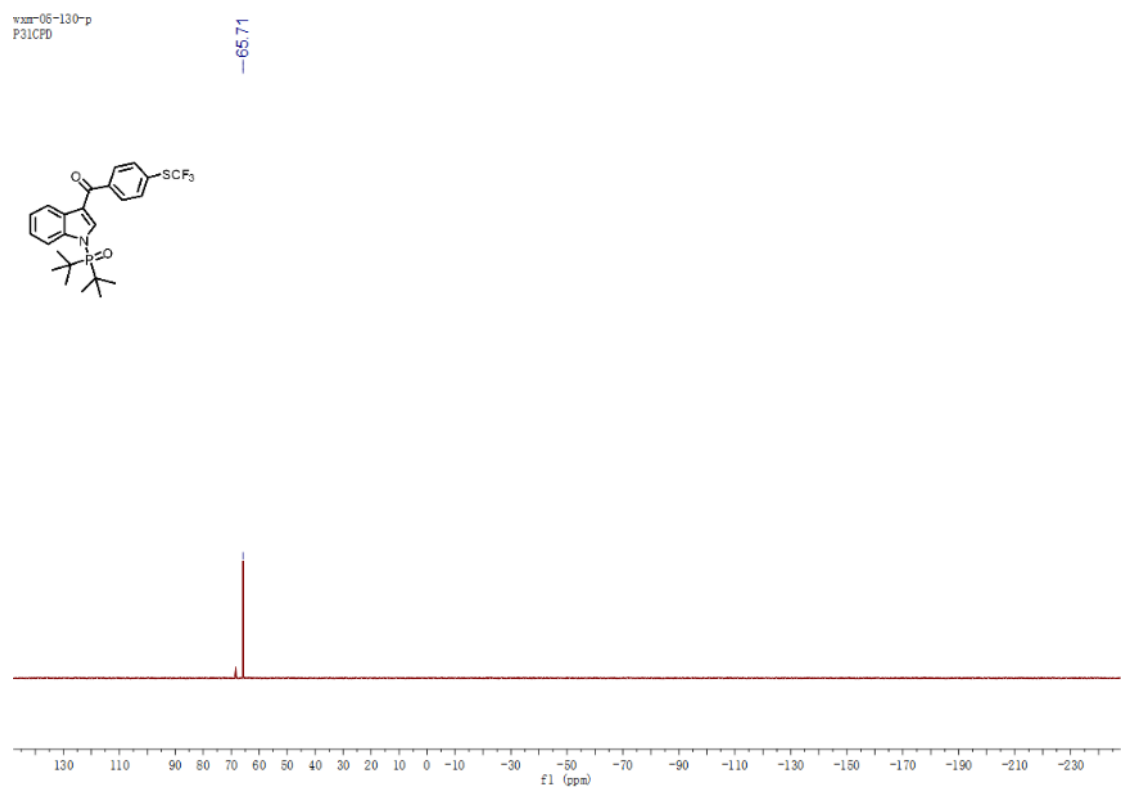

<sup>1</sup>H NMR spectrum (400 MHz, CDCl<sub>3</sub>) of compound **3m**

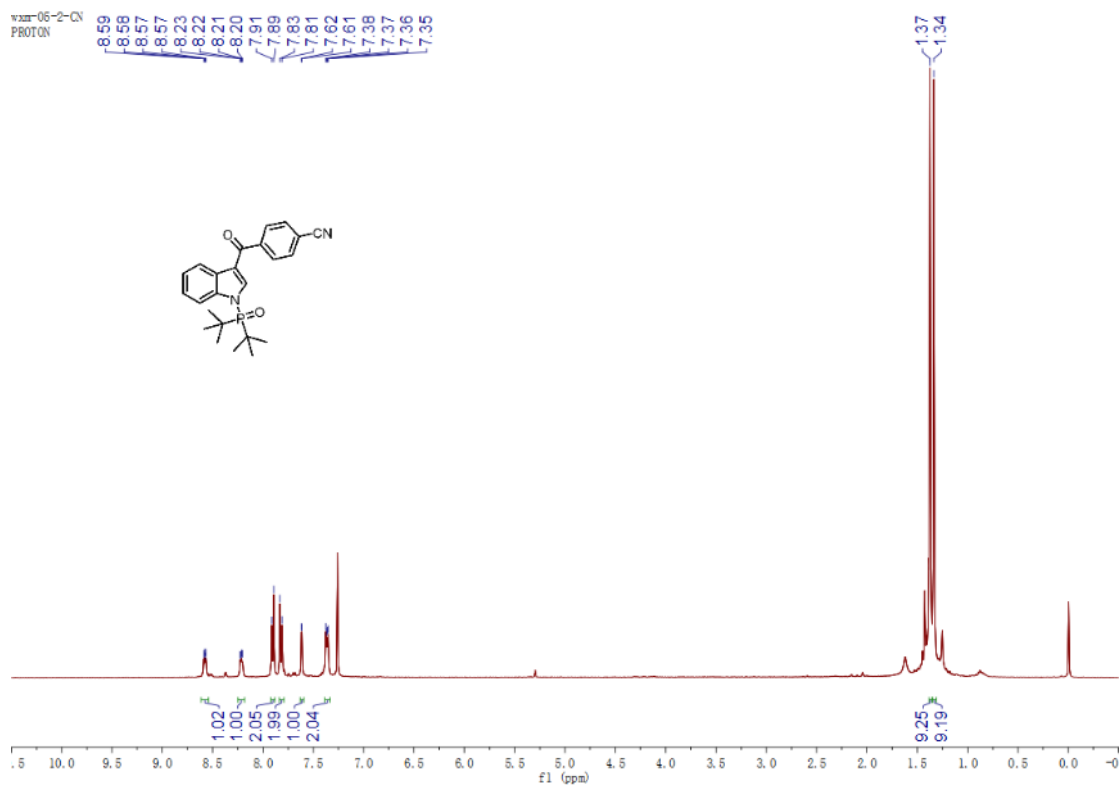

<sup>13</sup>C NMR spectrum (100 MHz, CDCl<sub>3</sub>) of compound **3m**

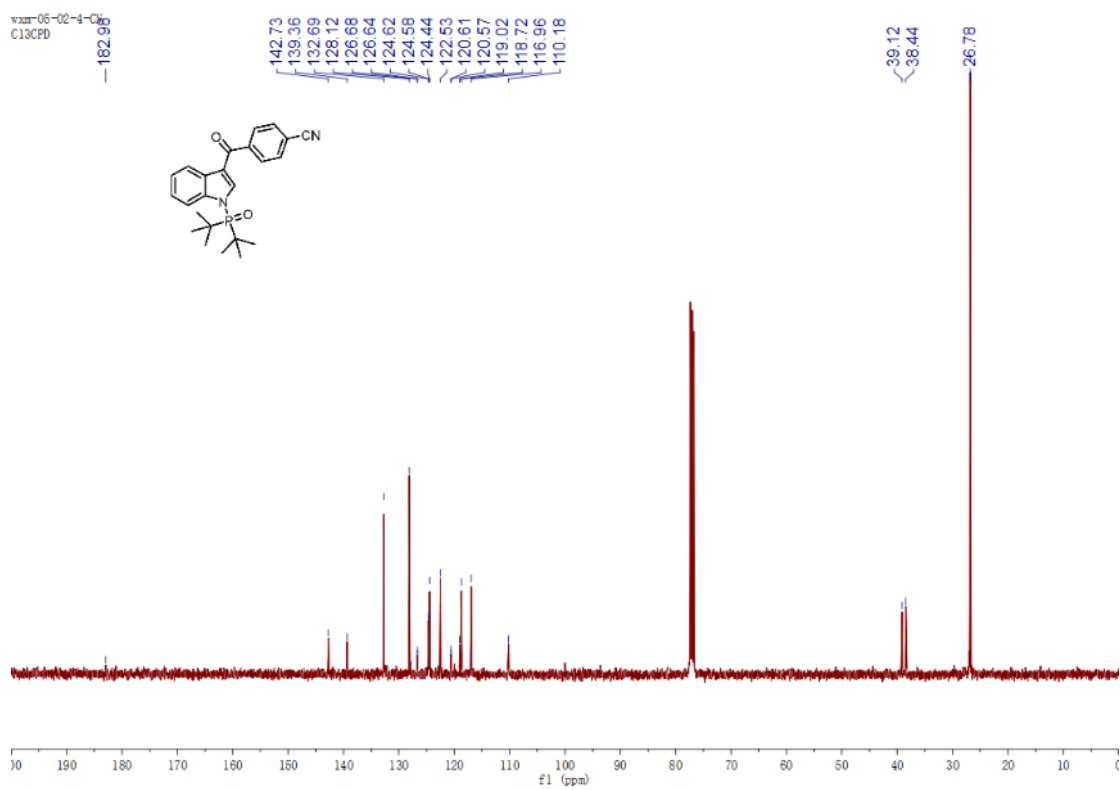

<sup>31</sup>P NMR spectrum (162 MHz, CDCl<sub>3</sub>) of compound **3m**

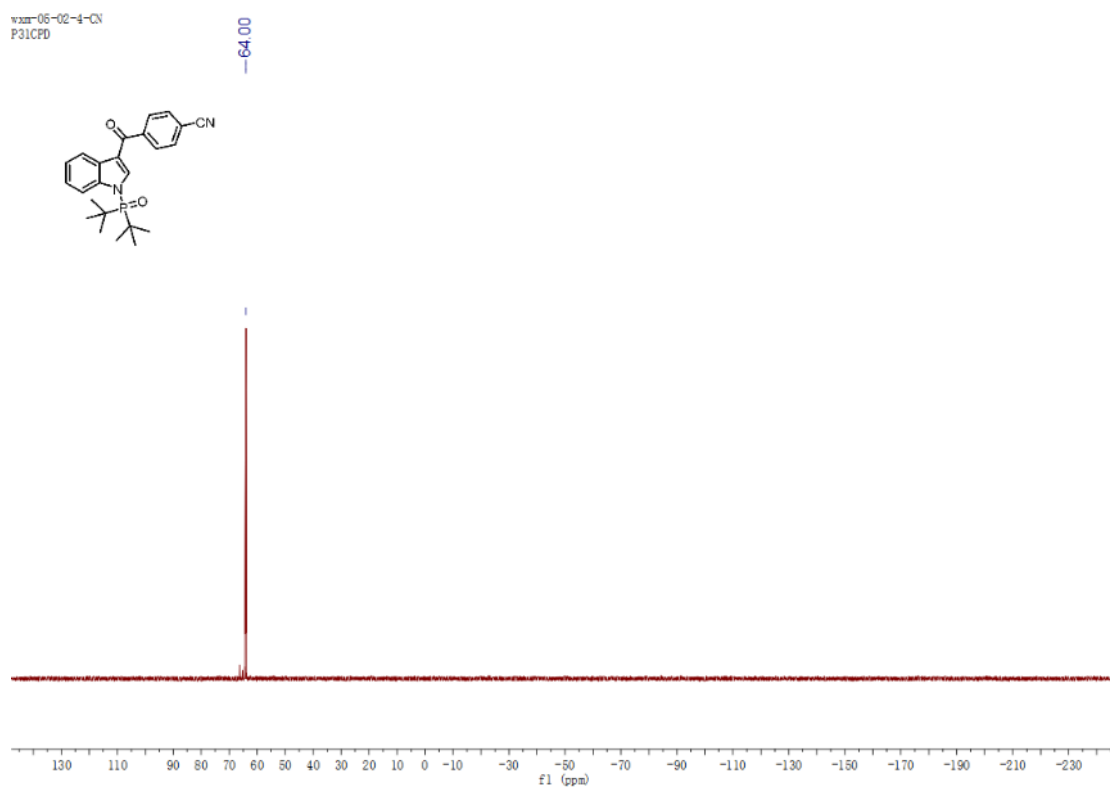

<sup>1</sup>H NMR spectrum (400 MHz, CDCl<sub>3</sub>) of compound **3n**

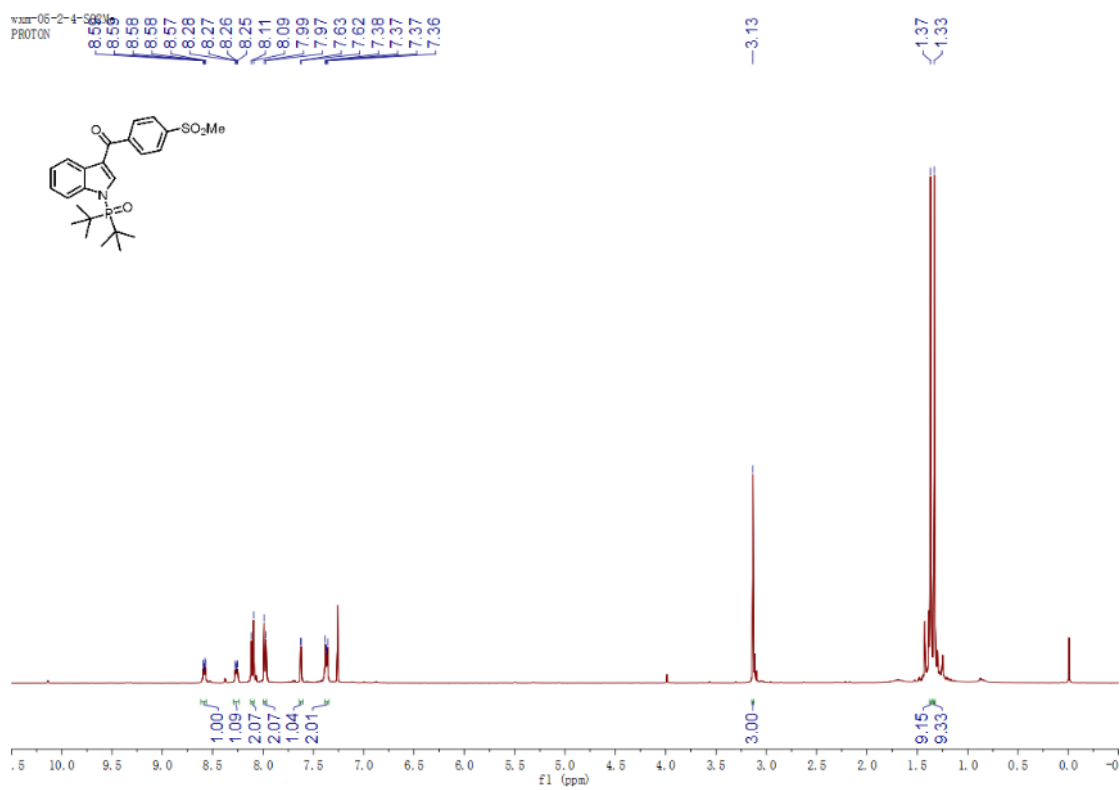

<sup>13</sup>C NMR spectrum (100 MHz, CDCl<sub>3</sub>) of compound **3n**

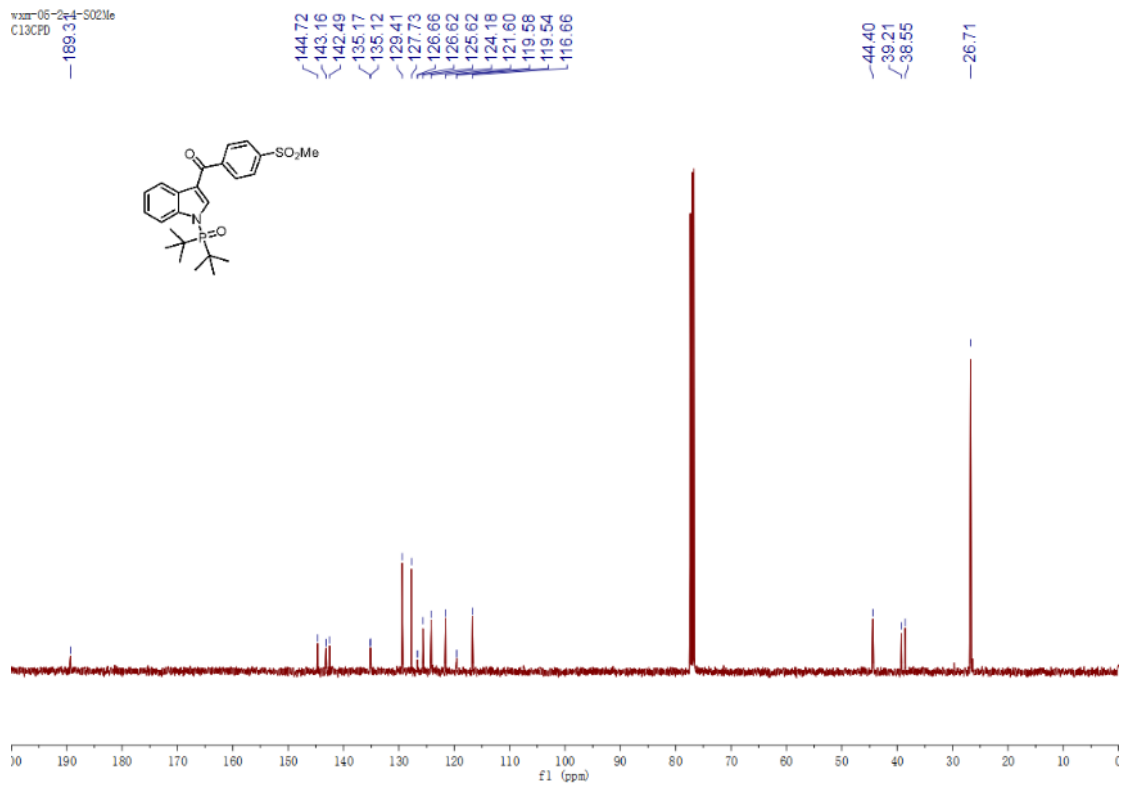

<sup>31</sup>P NMR spectrum (162 MHz, CDCl<sub>3</sub>) of compound **3n**

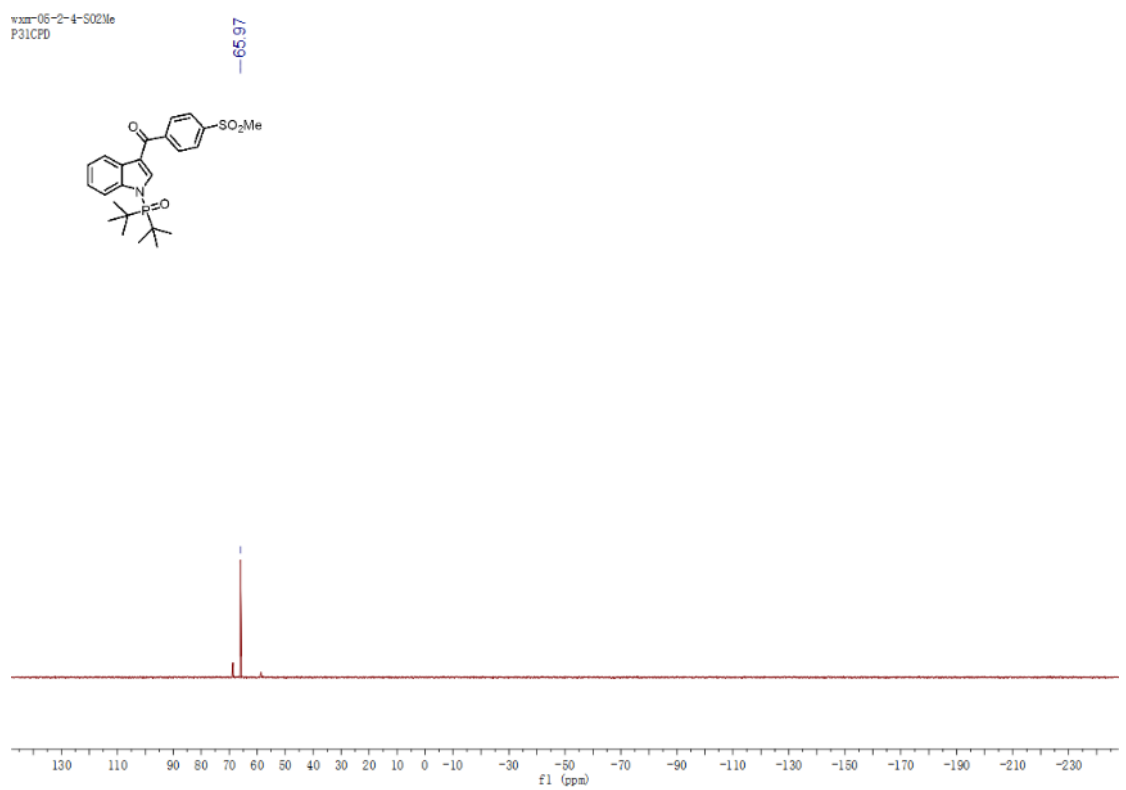

<sup>1</sup>H NMR spectrum (400 MHz, CDCl<sub>3</sub>) of compound **3o**

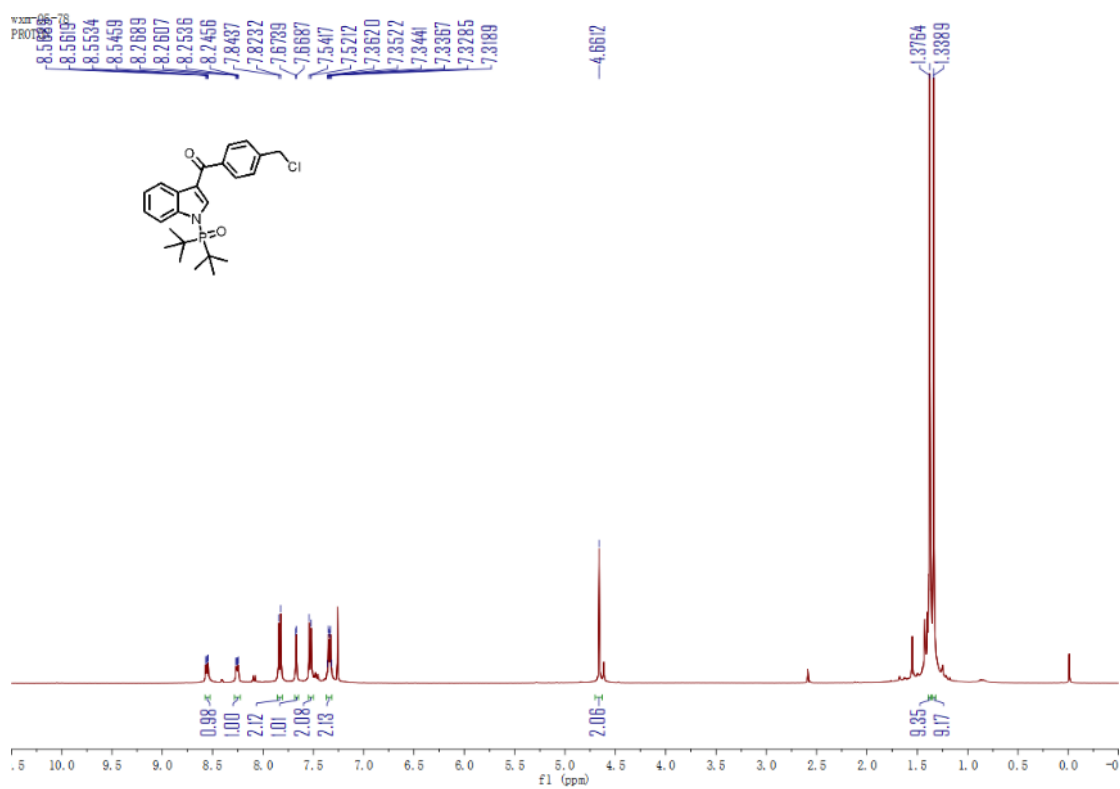

<sup>13</sup>C NMR spectrum (100 MHz, CDCl<sub>3</sub>) of compound **3o**

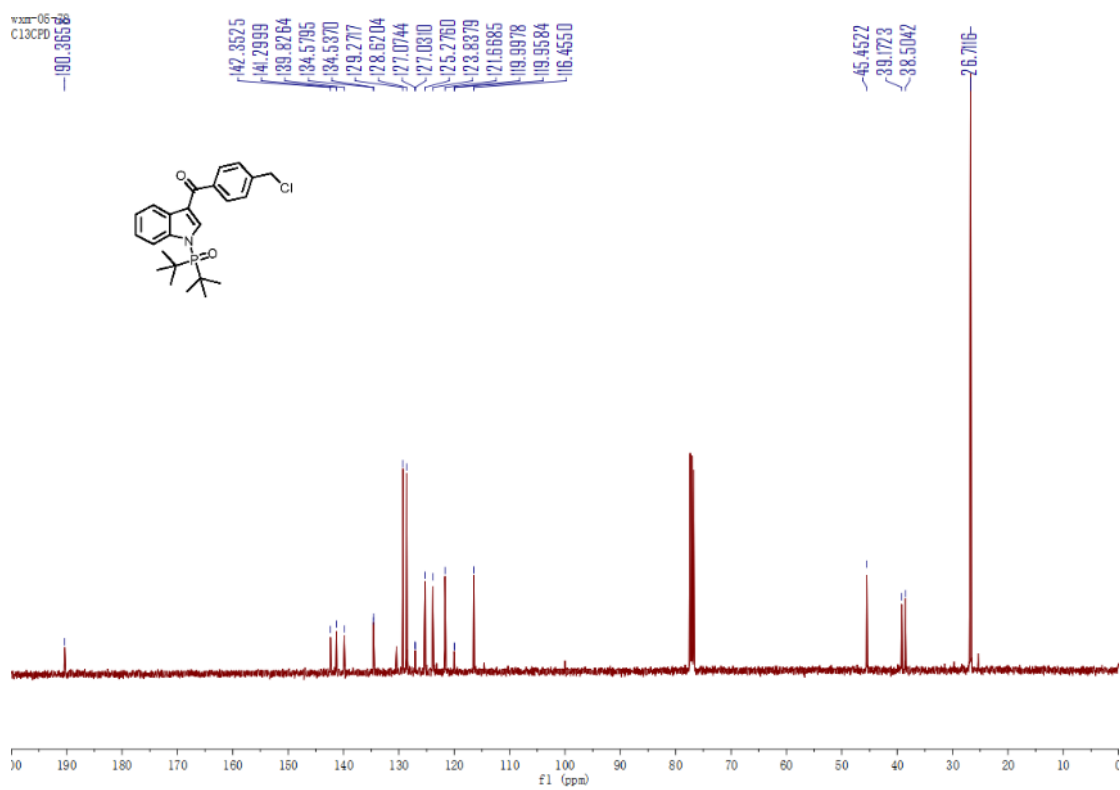



<sup>31</sup>P NMR spectrum (162 MHz, CDCl<sub>3</sub>) of compound **3o**

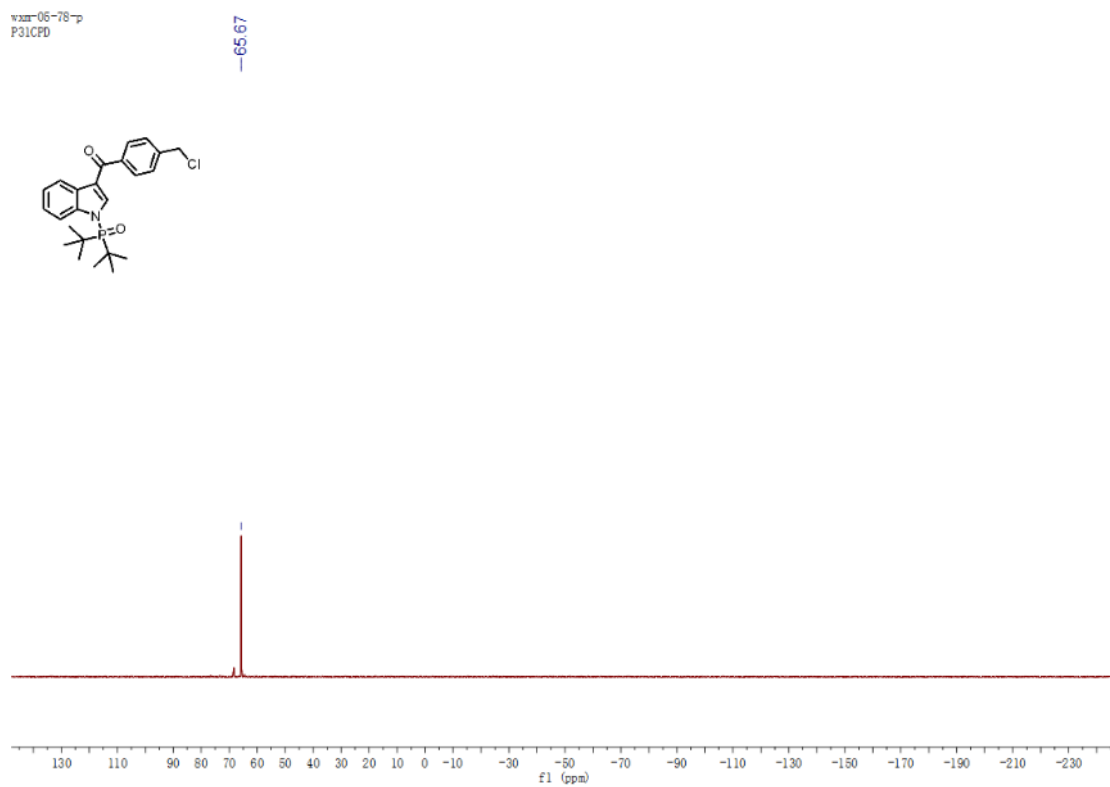

<sup>1</sup>H NMR spectrum (400 MHz, CDCl<sub>3</sub>) of compound **3p**

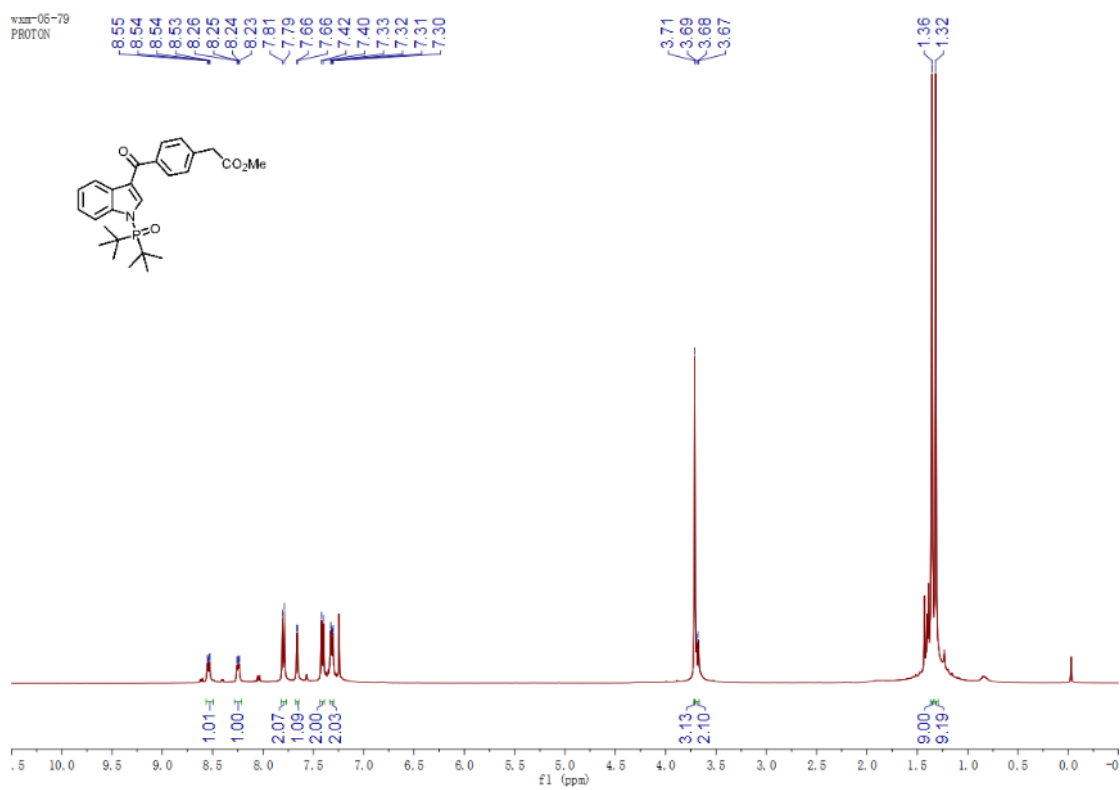

<sup>13</sup>C NMR spectrum (100 MHz, CDCl<sub>3</sub>) of compound **3p**

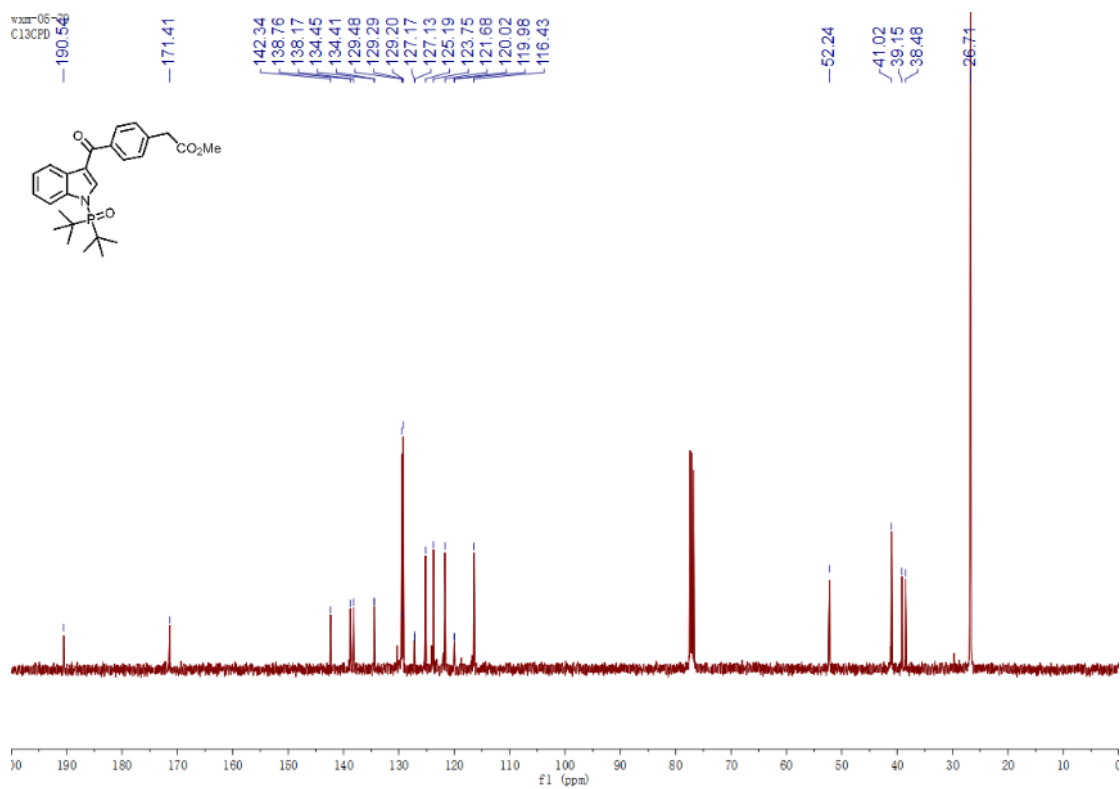

<sup>31</sup>P NMR spectrum (162 MHz, CDCl<sub>3</sub>) of compound **3p**

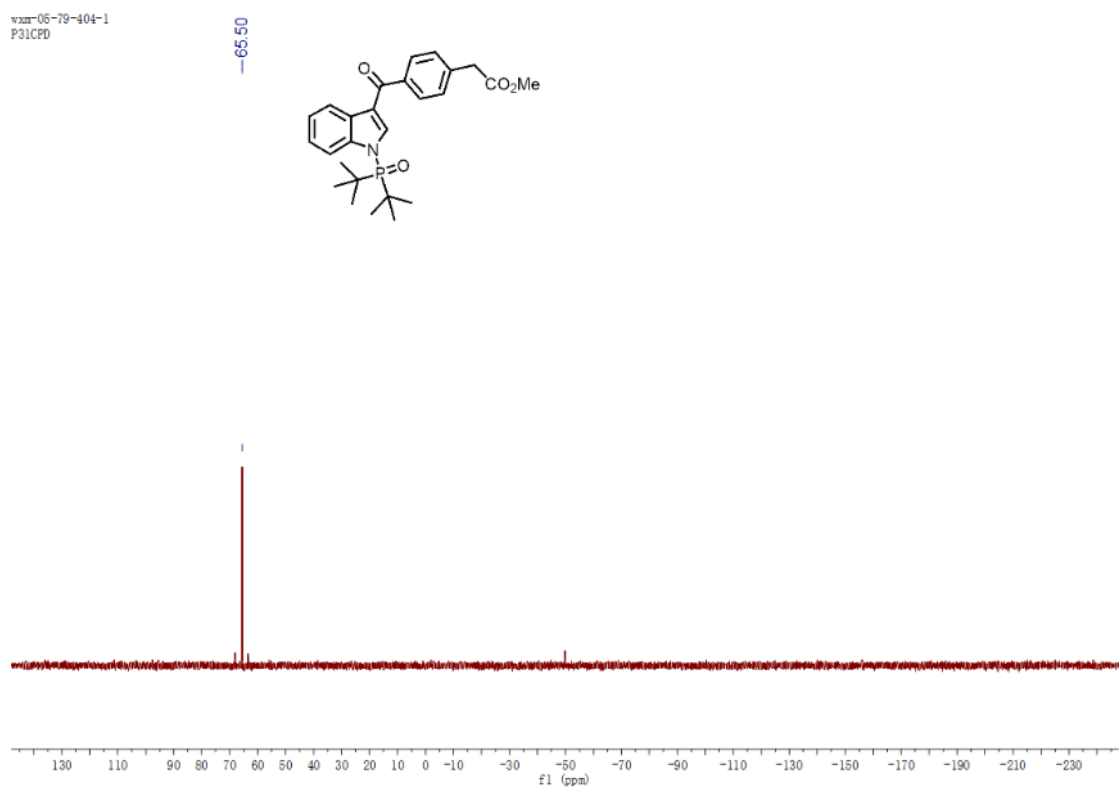

<sup>1</sup>H NMR spectrum (400 MHz, CDCl<sub>3</sub>) of compound **3q**

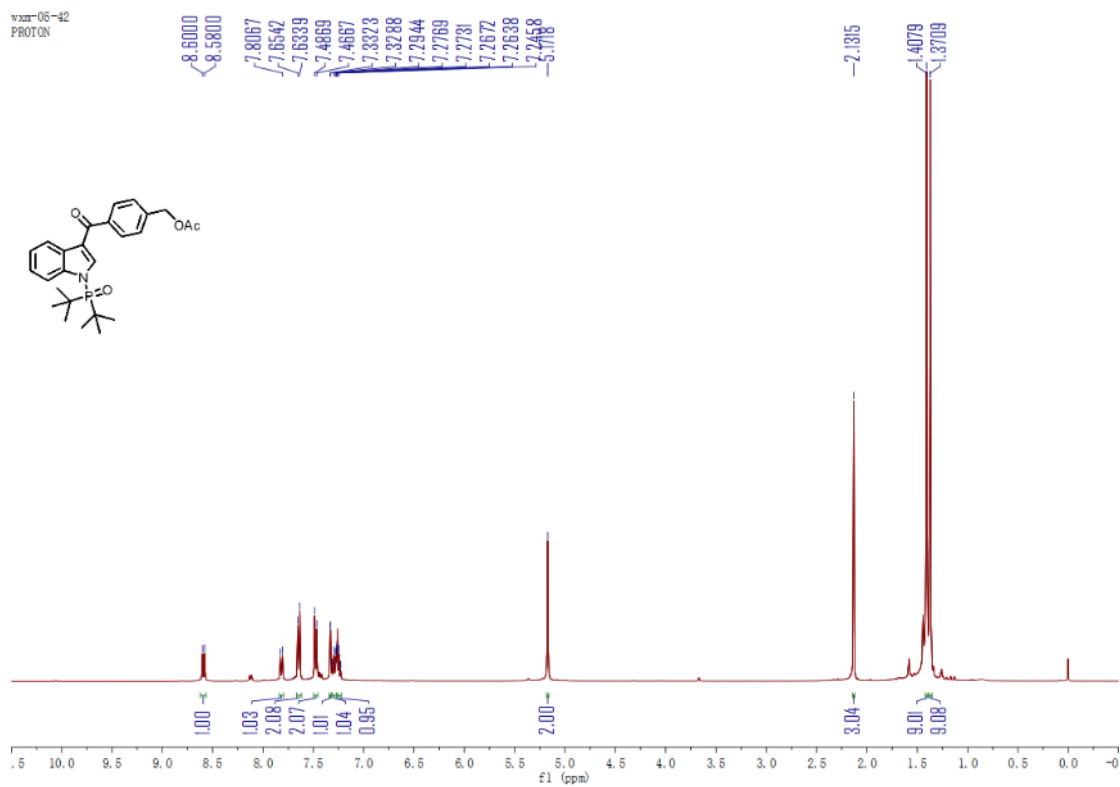

<sup>13</sup>C NMR spectrum (100 MHz, CDCl<sub>3</sub>) of compound **3q**

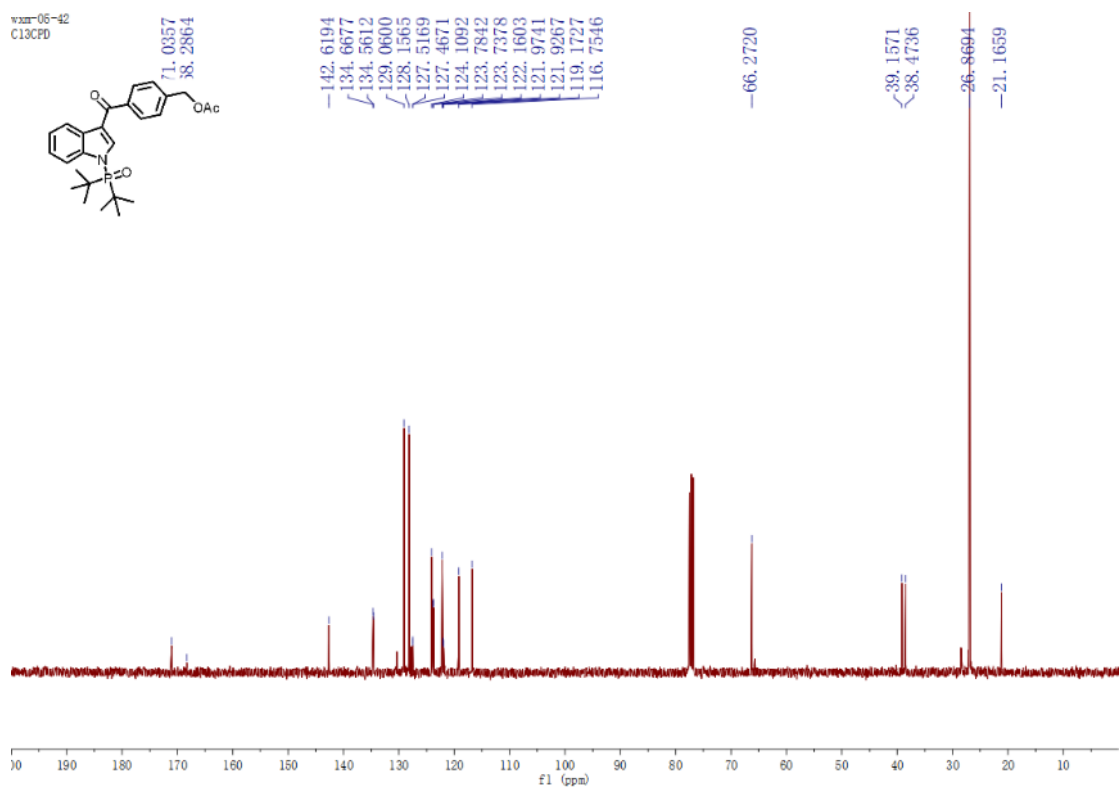

<sup>31</sup>P NMR spectrum (162 MHz, CDCl<sub>3</sub>) of compound **3q**

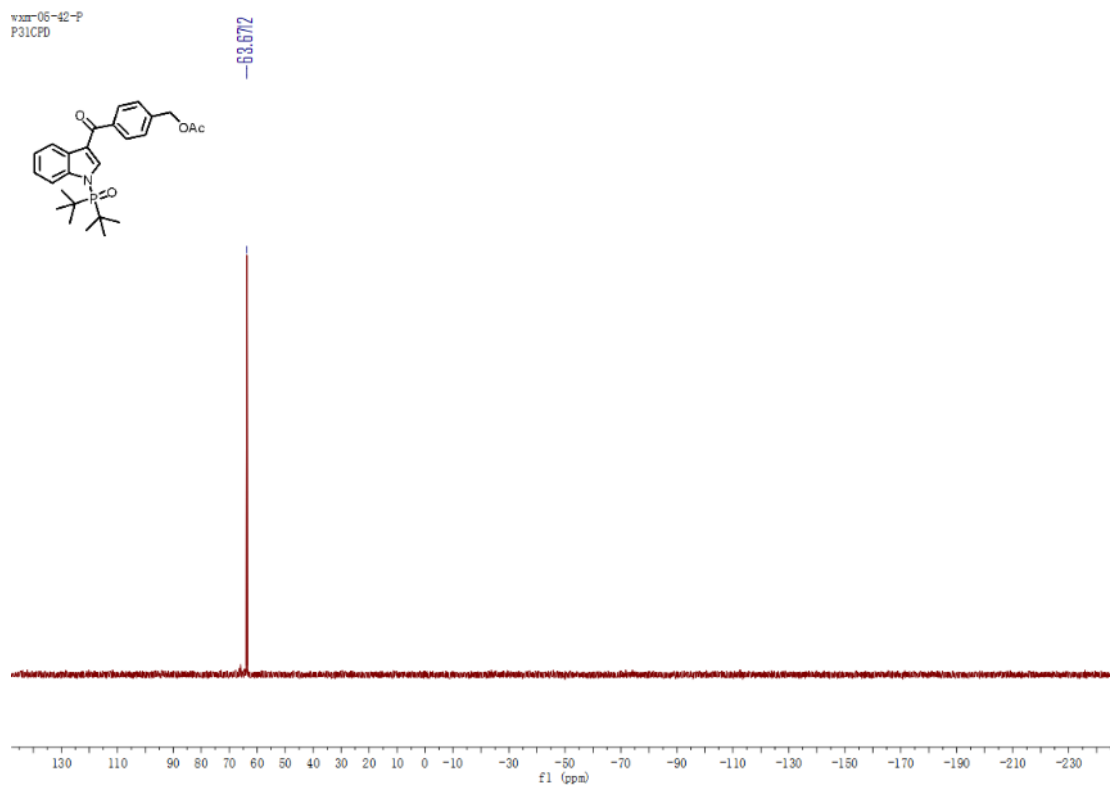

<sup>1</sup>H NMR spectrum (400 MHz, CDCl<sub>3</sub>) of compound **3r**

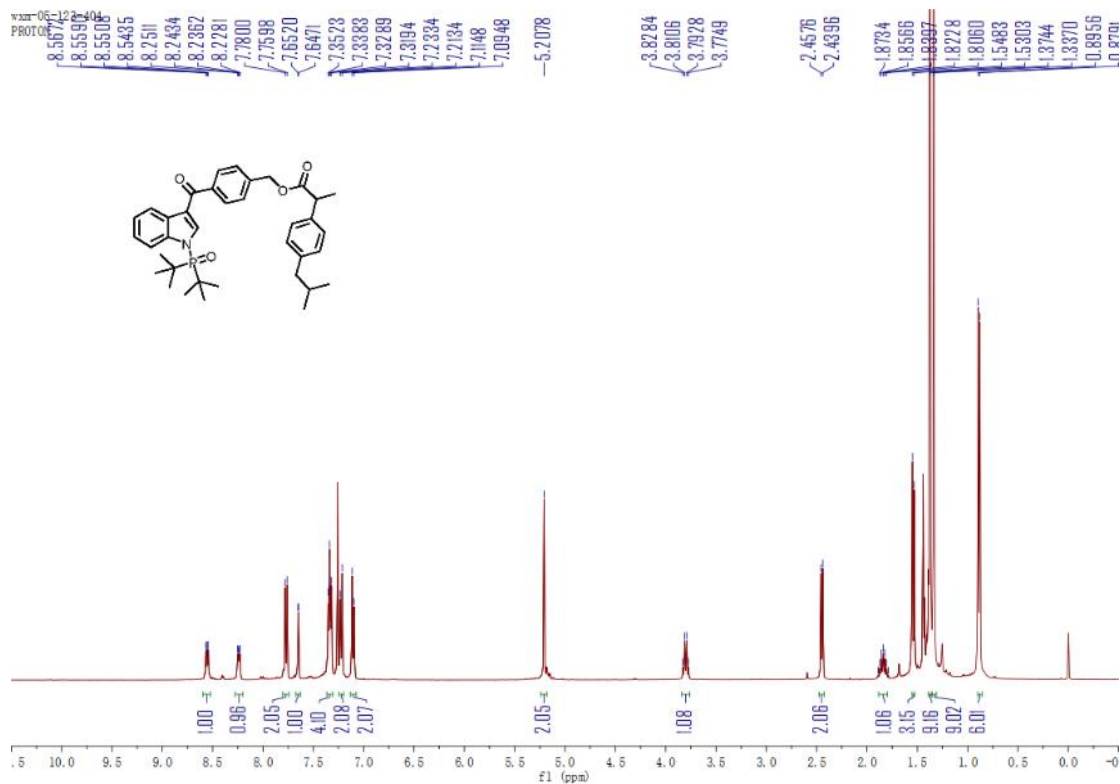

<sup>13</sup>C NMR spectrum (100 MHz, CDCl<sub>3</sub>) of compound **3r**

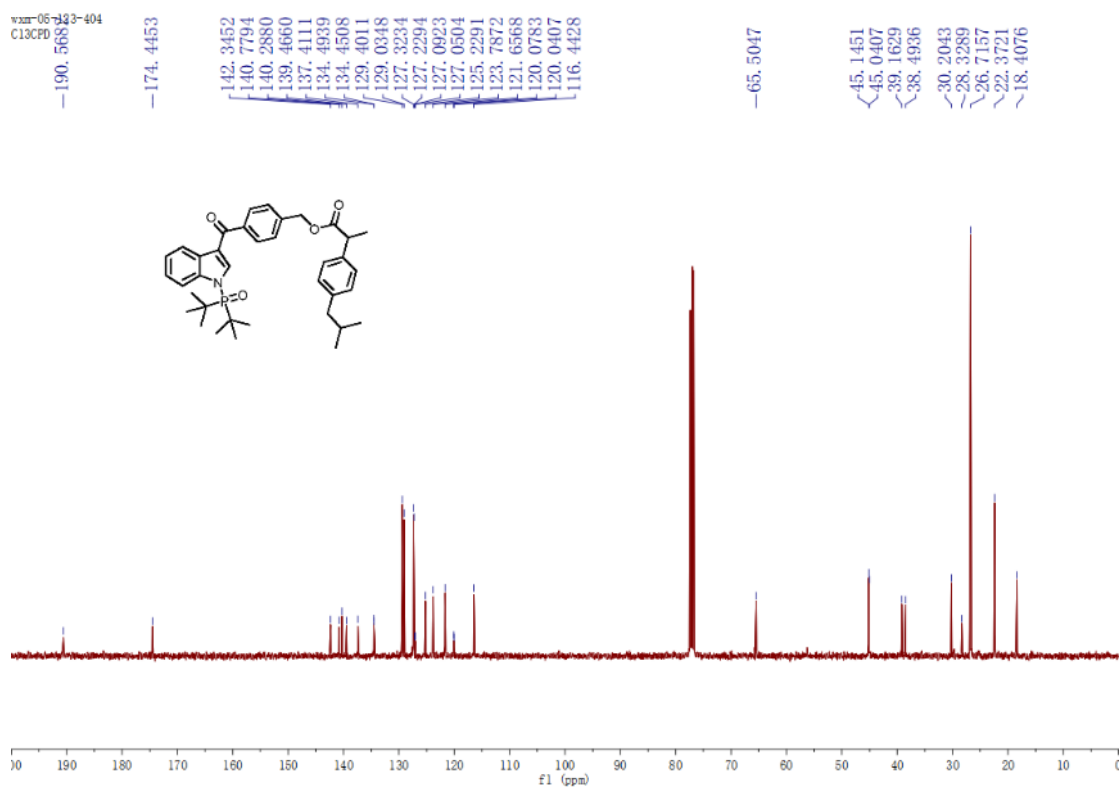

<sup>31</sup>P NMR spectrum (162 MHz, CDCl<sub>3</sub>) of compound **3r**

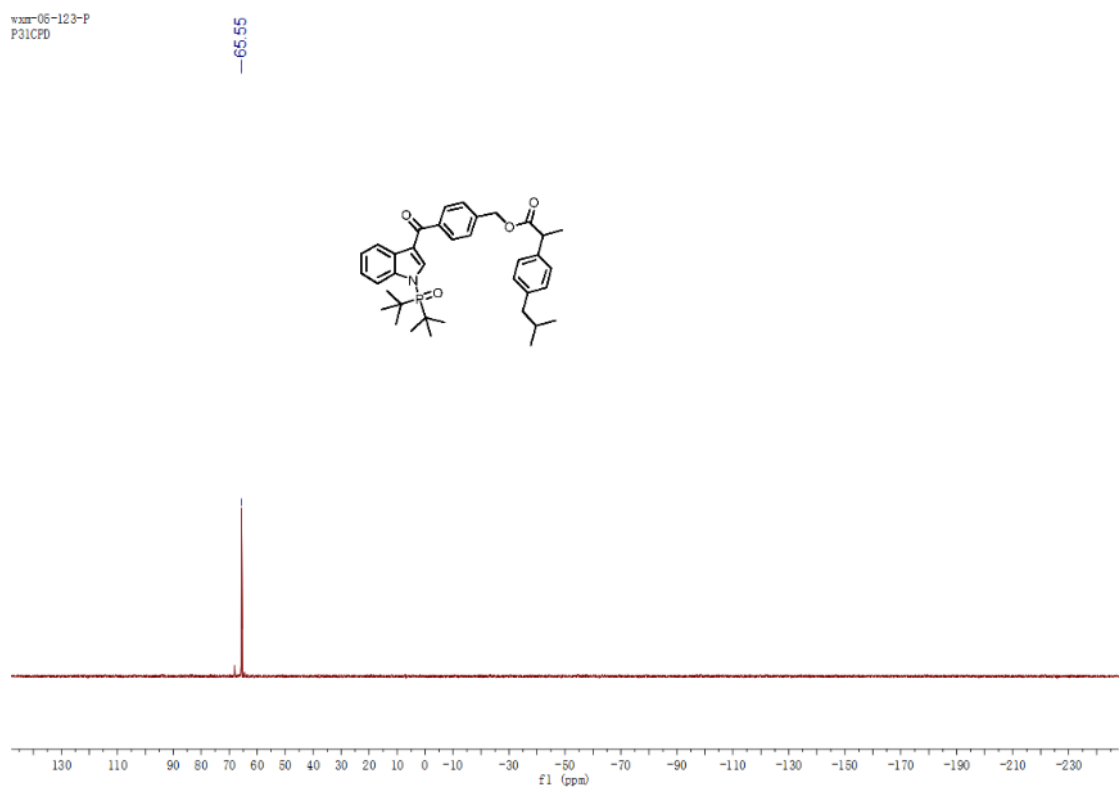

<sup>1</sup>H NMR spectrum (400 MHz, CDCl<sub>3</sub>) of compound **3s**

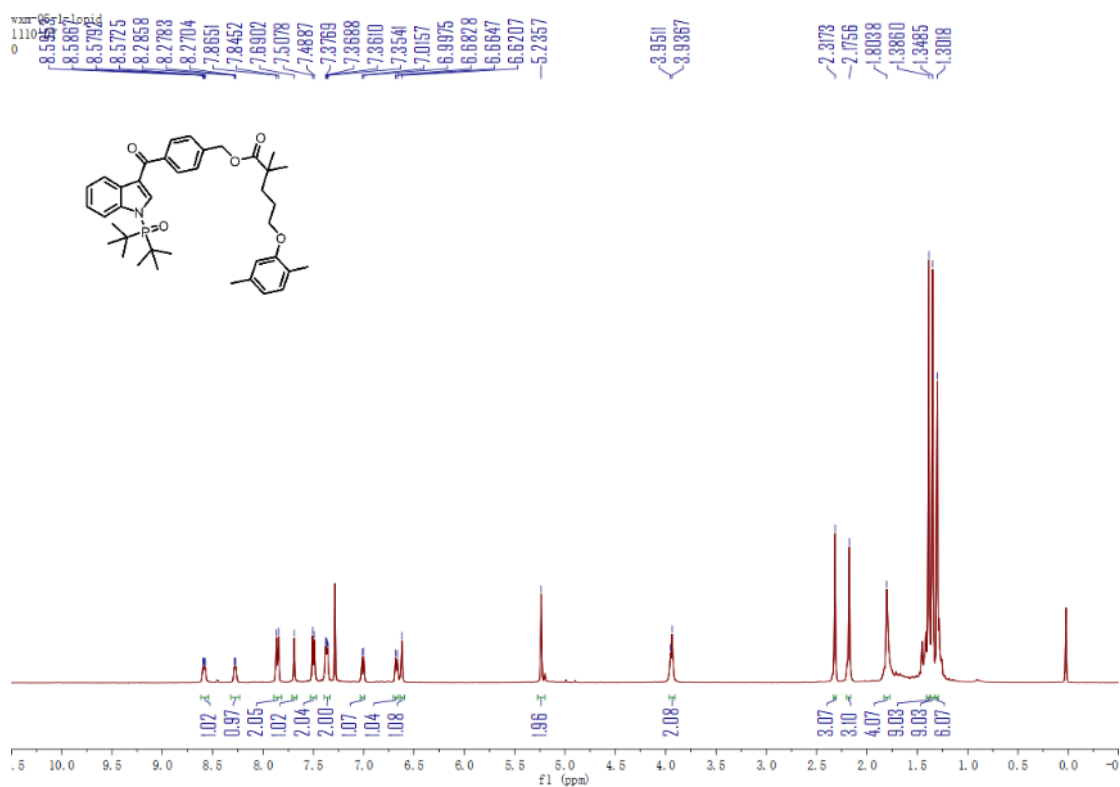

<sup>13</sup>C NMR spectrum (100 MHz, CDCl<sub>3</sub>) of compound **3s**

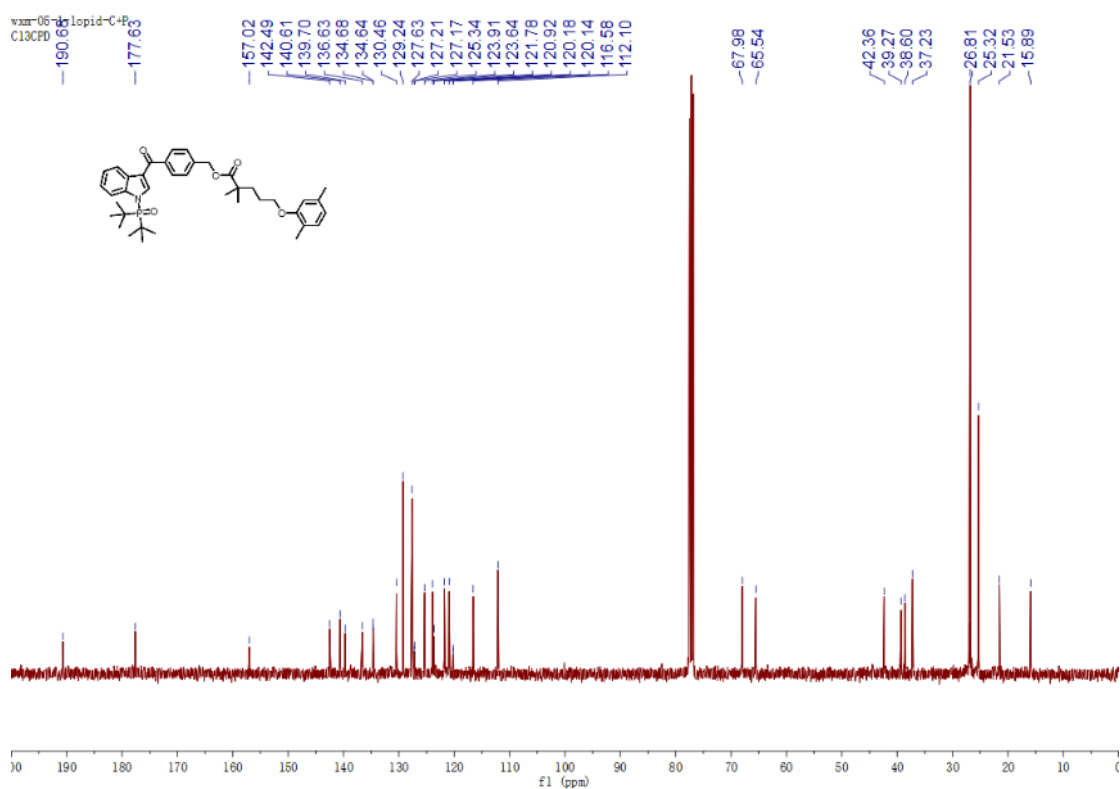

<sup>31</sup>P NMR spectrum (162 MHz, CDCl<sub>3</sub>) of compound **3s**

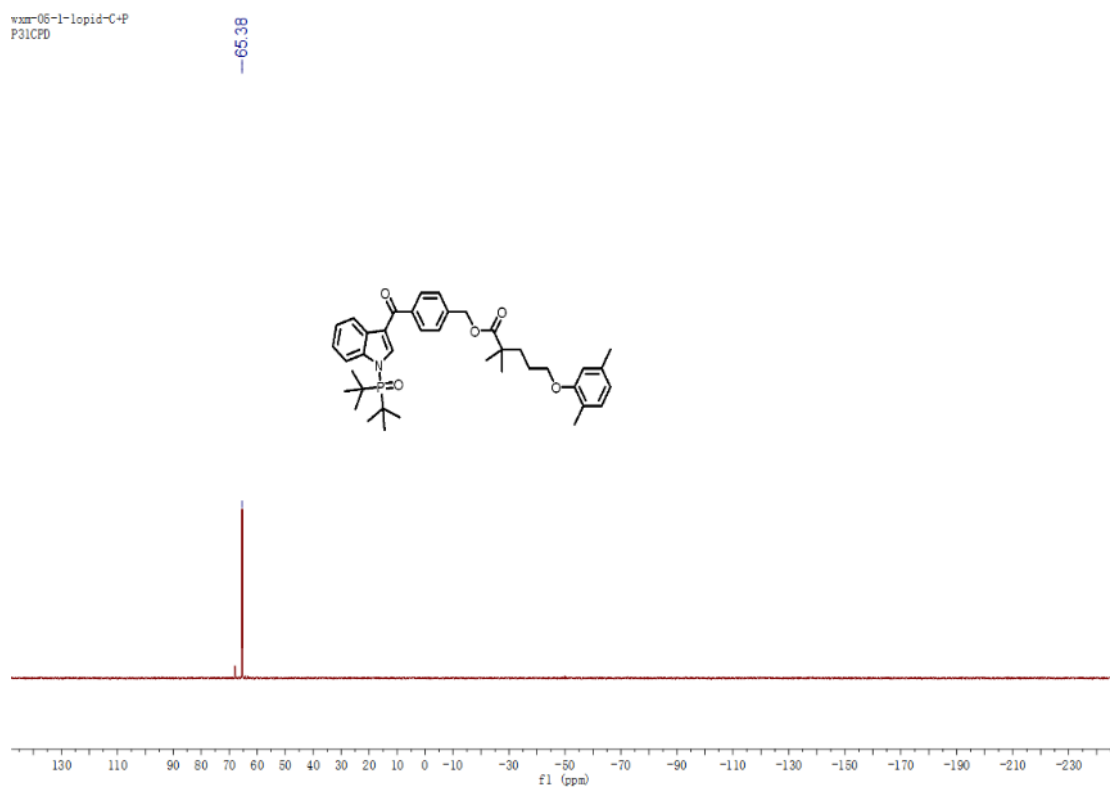

<sup>1</sup>H NMR spectrum (400 MHz, CDCl<sub>3</sub>) of compound **3t**

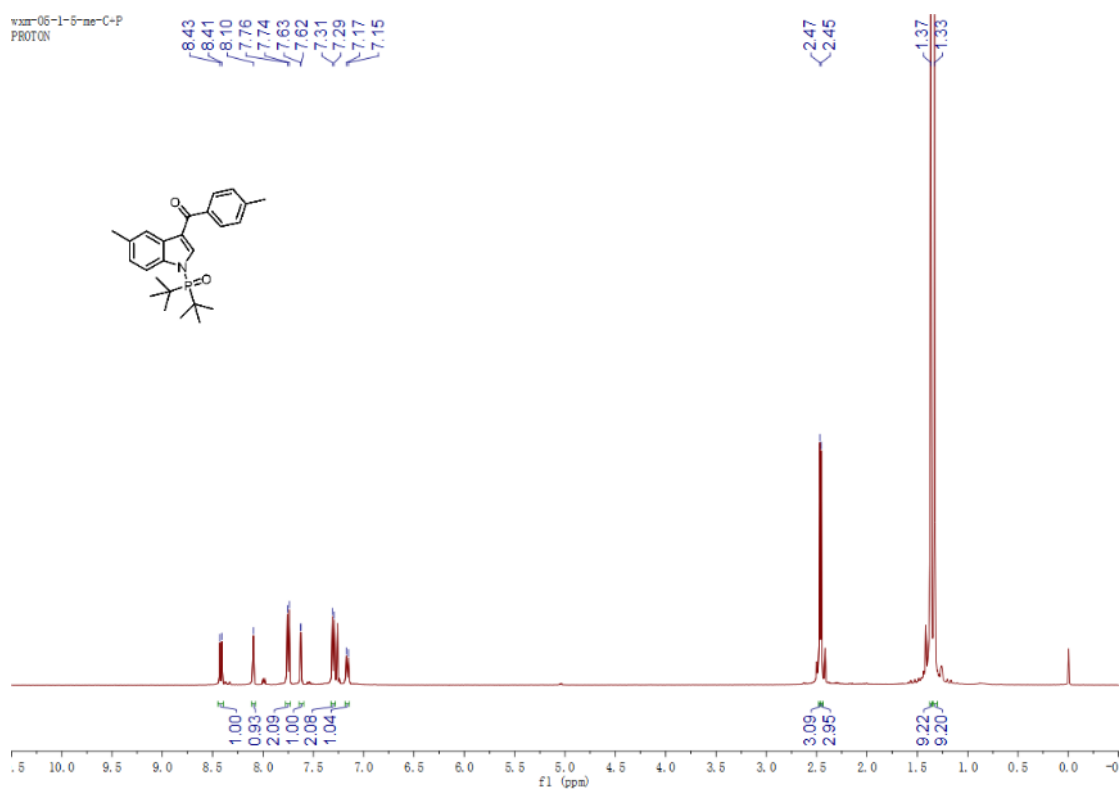

<sup>13</sup>C NMR spectrum (100 MHz, CDCl<sub>3</sub>) of compound **3t**

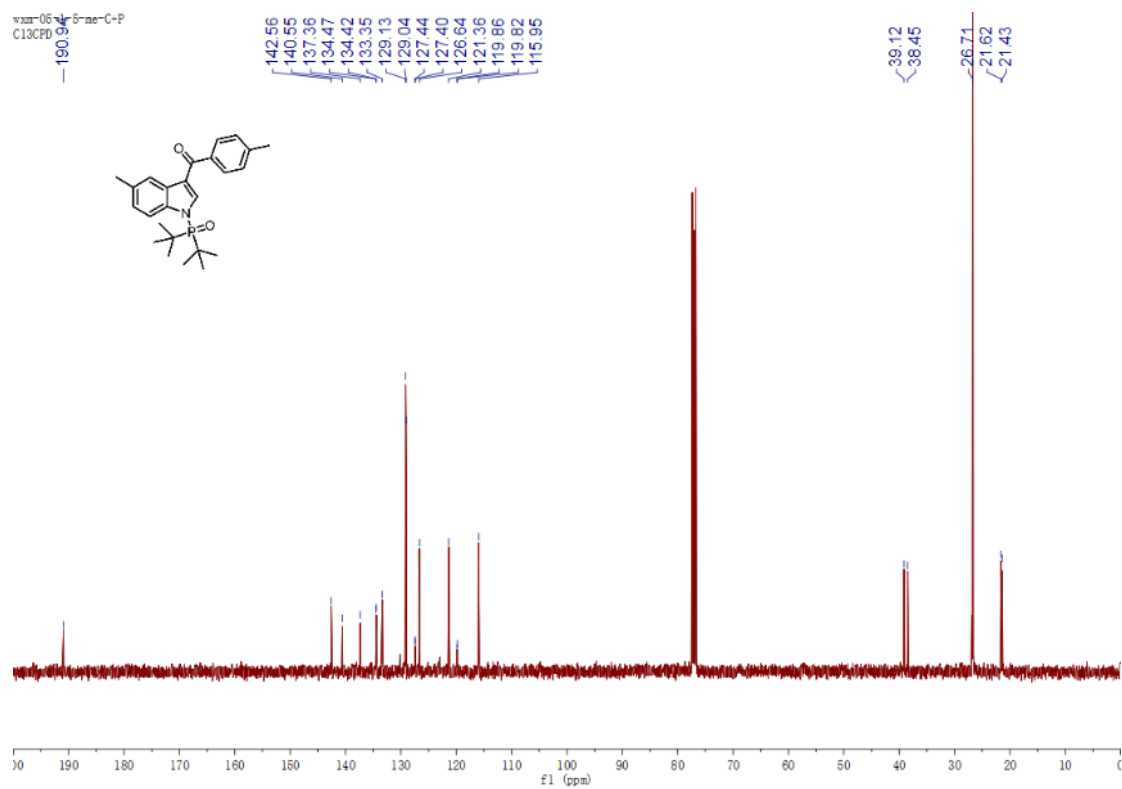

<sup>31</sup>P NMR spectrum (162 MHz, CDCl<sub>3</sub>) of compound **3t**

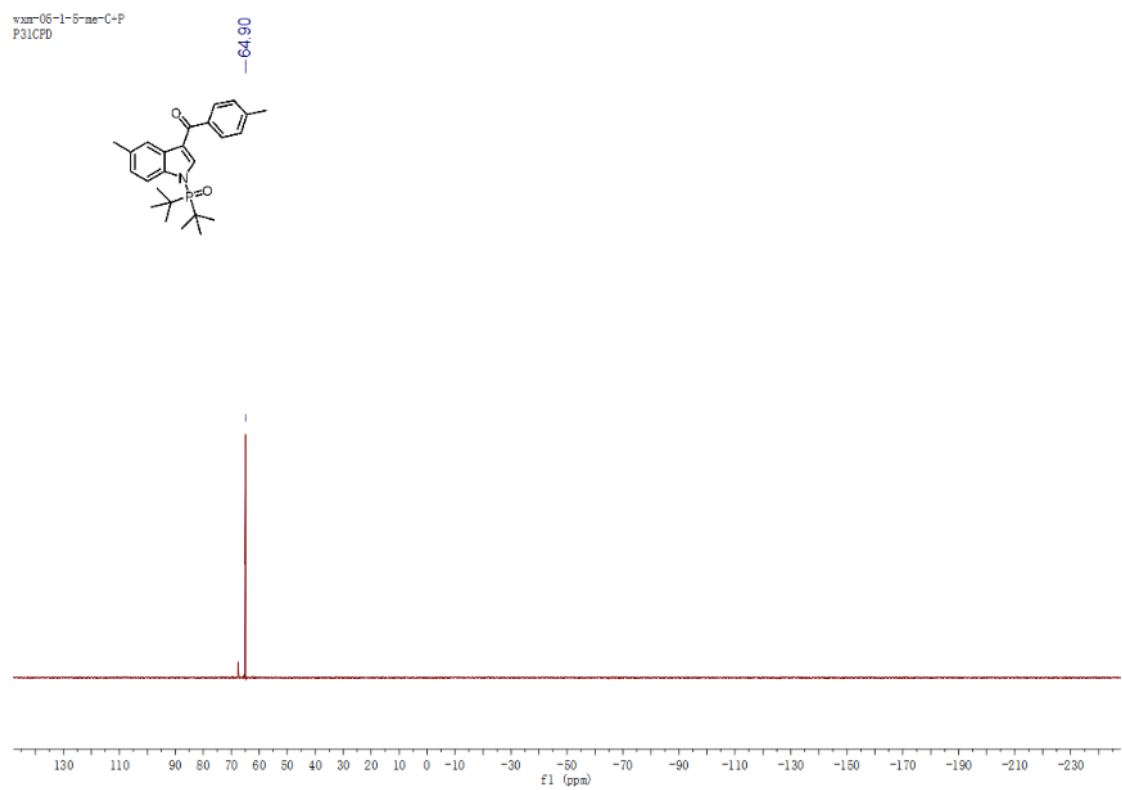



<sup>1</sup>H NMR spectrum (400 MHz, CDCl<sub>3</sub>) of compound **3u**

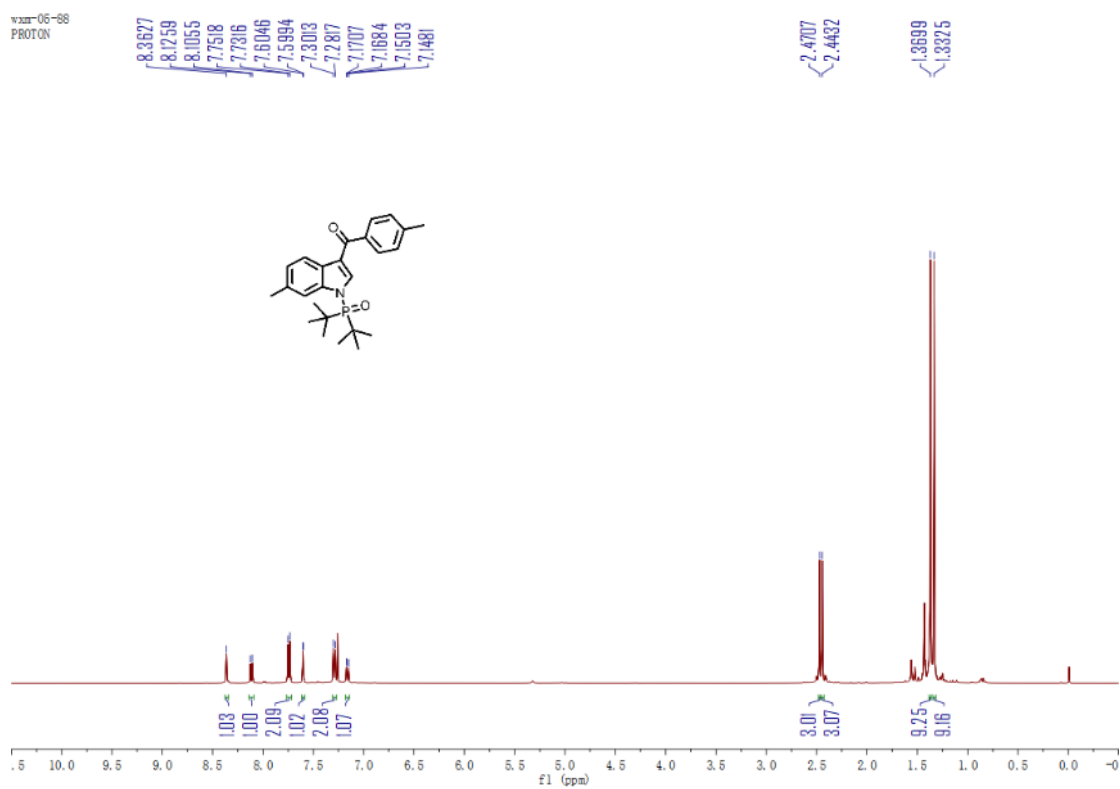

<sup>13</sup>C NMR spectrum (100 MHz, CDCl<sub>3</sub>) of compound **3u**

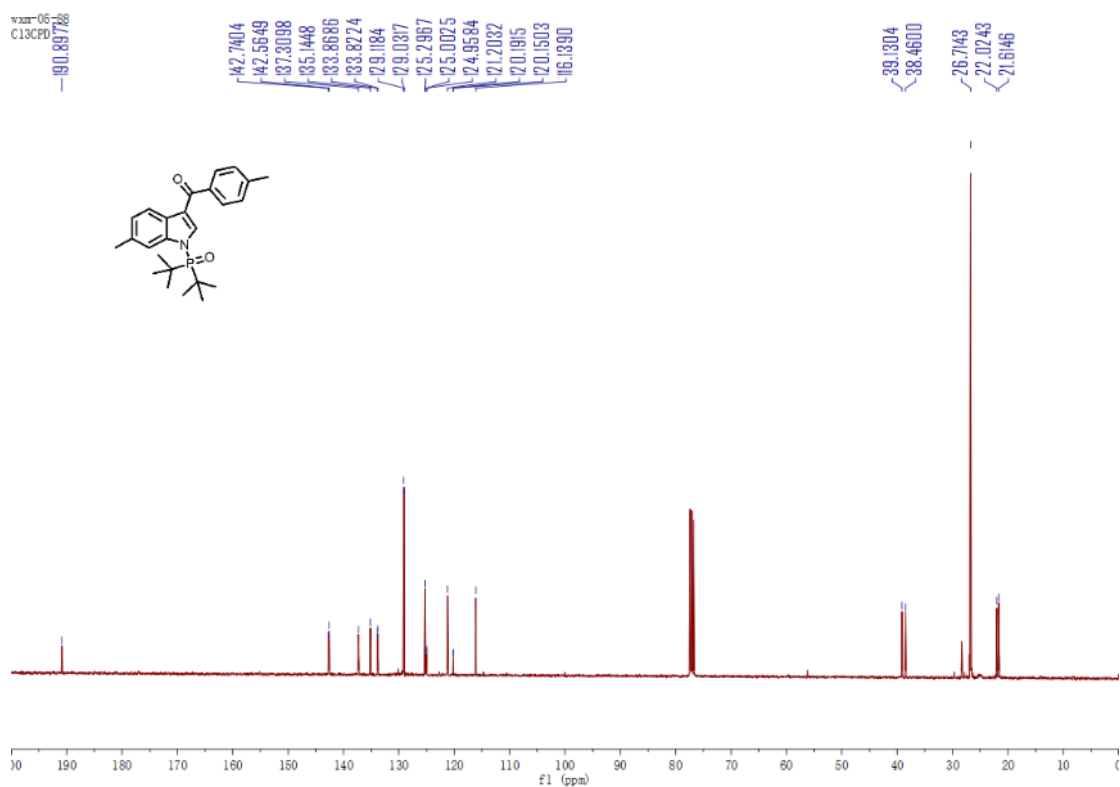

<sup>31</sup>P NMR spectrum (162 MHz, CDCl<sub>3</sub>) of compound **3u**

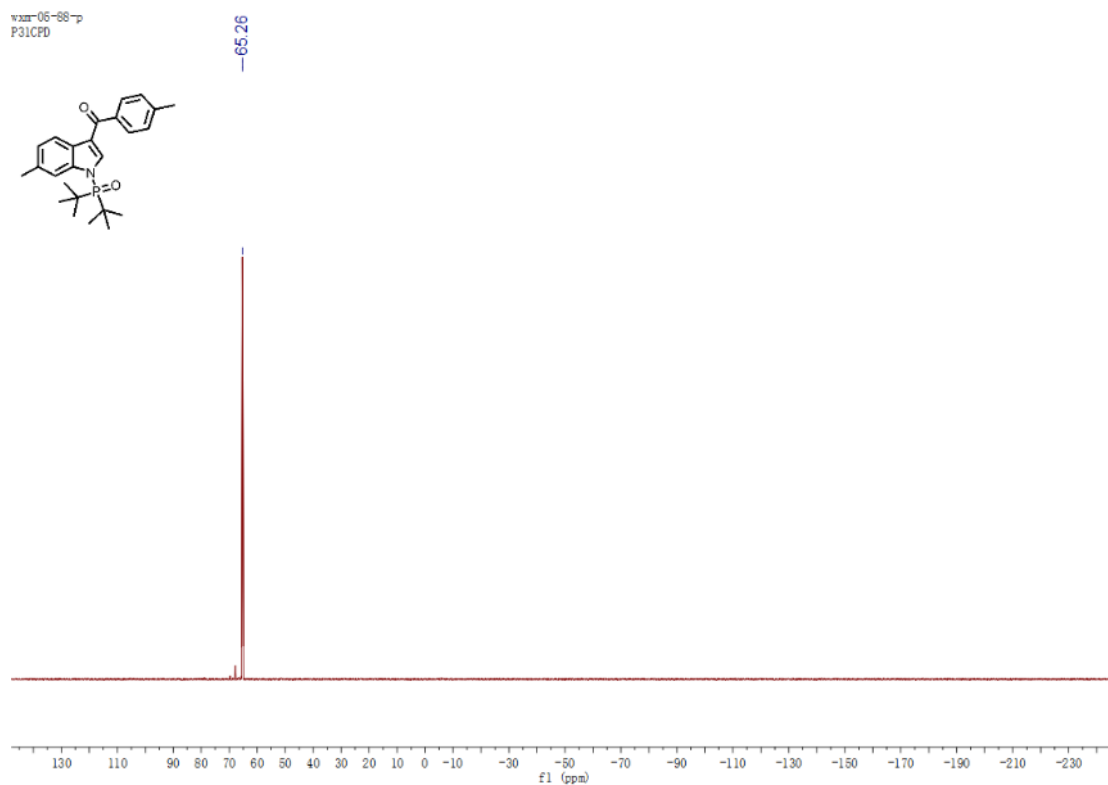

<sup>1</sup>H NMR spectrum (400 MHz, CDCl<sub>3</sub>) of compound **3v**

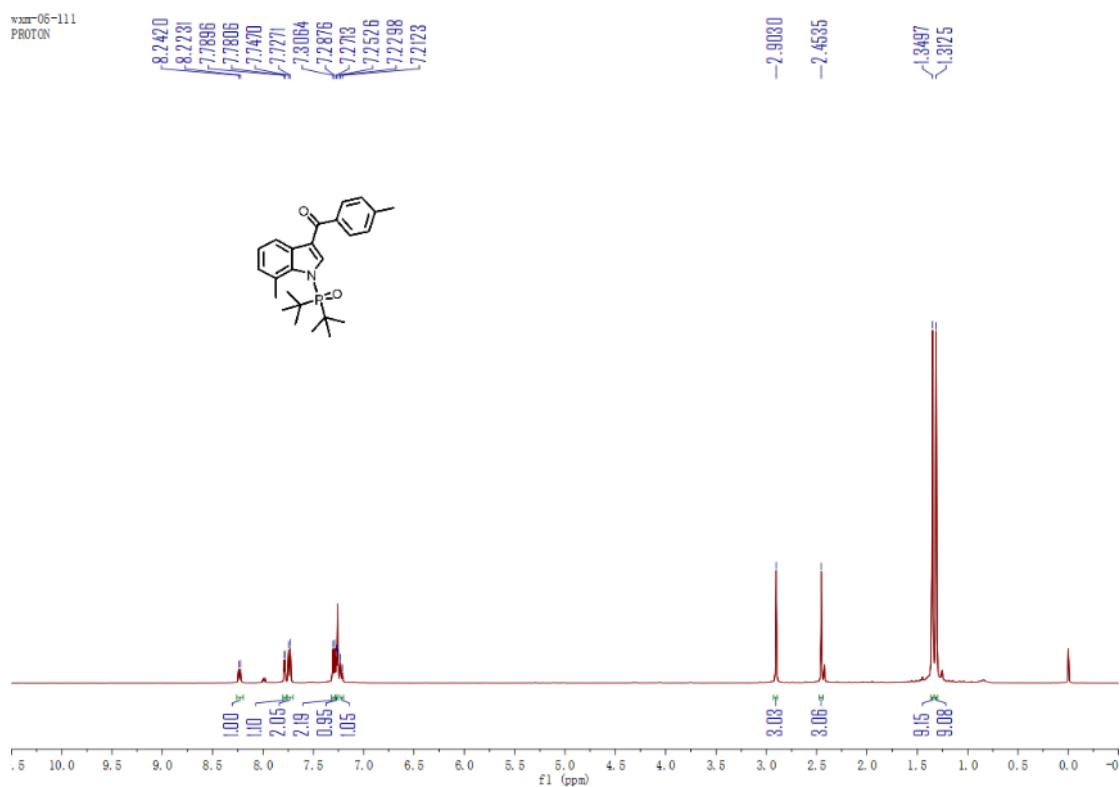

<sup>13</sup>C NMR spectrum (100 MHz, CDCl<sub>3</sub>) of compound **3v**

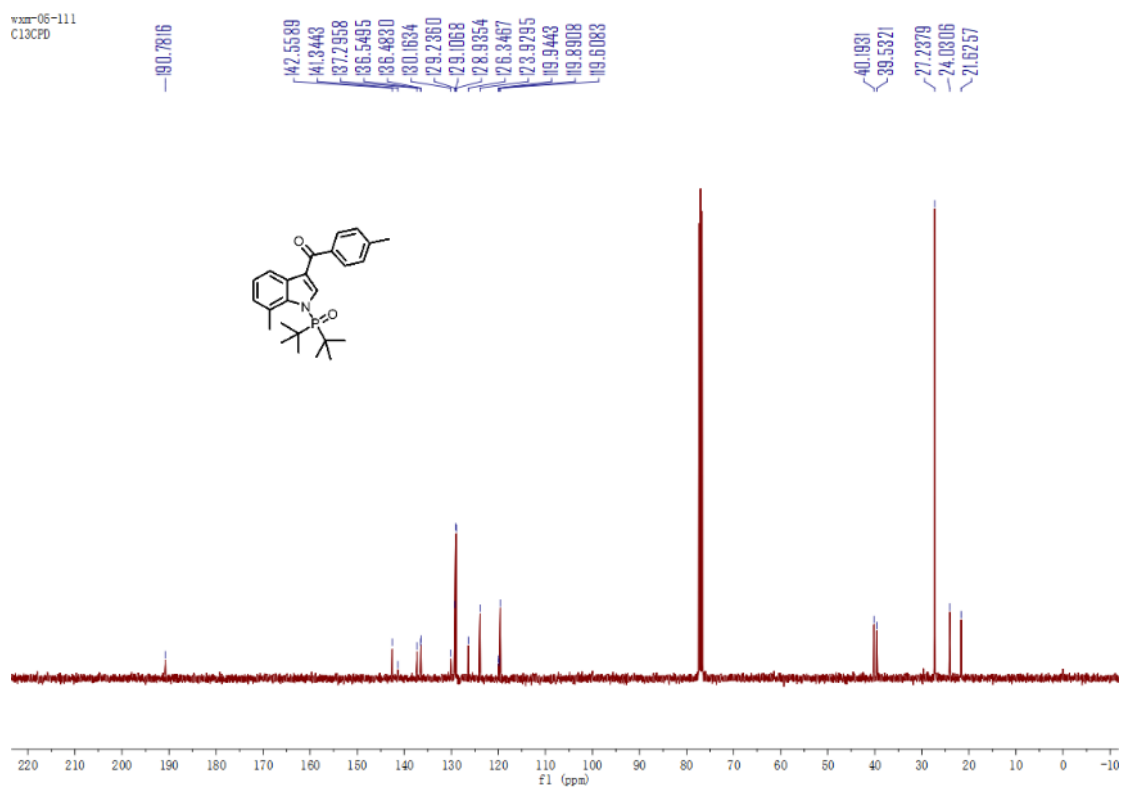

<sup>31</sup>P NMR spectrum (162 MHz, CDCl<sub>3</sub>) of compound **3v**

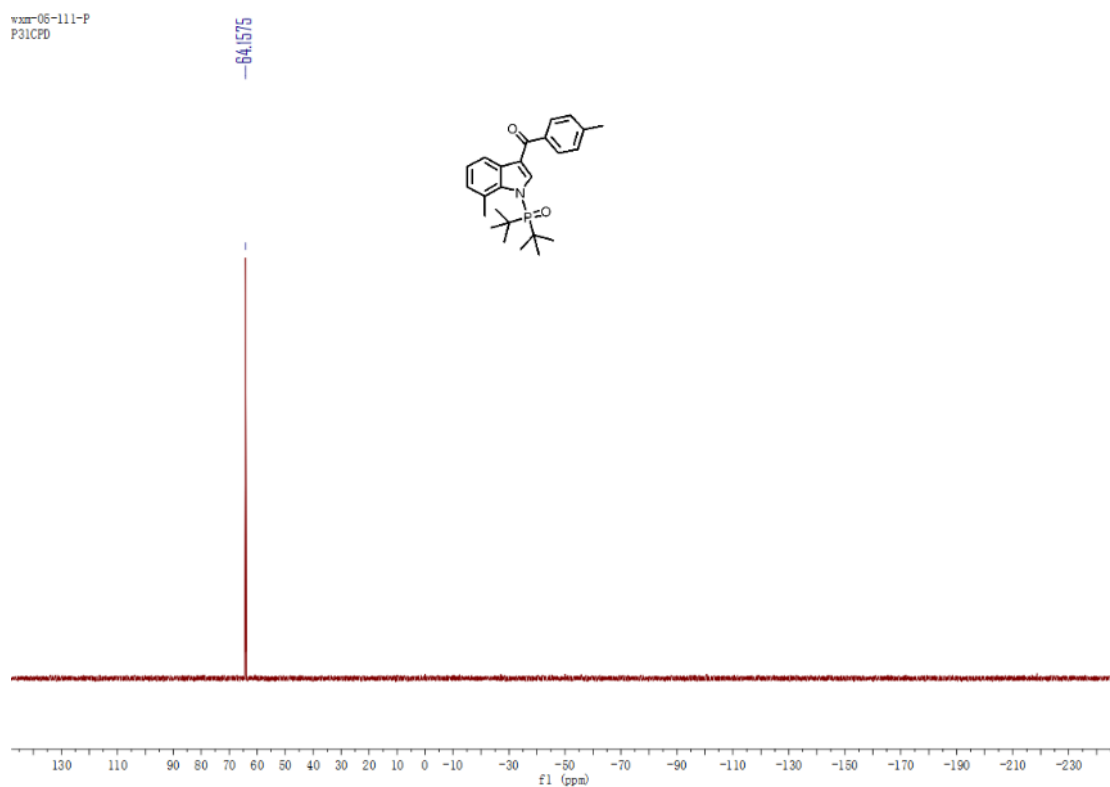

<sup>1</sup>H NMR spectrum (400 MHz, CDCl<sub>3</sub>) of compound **3w**

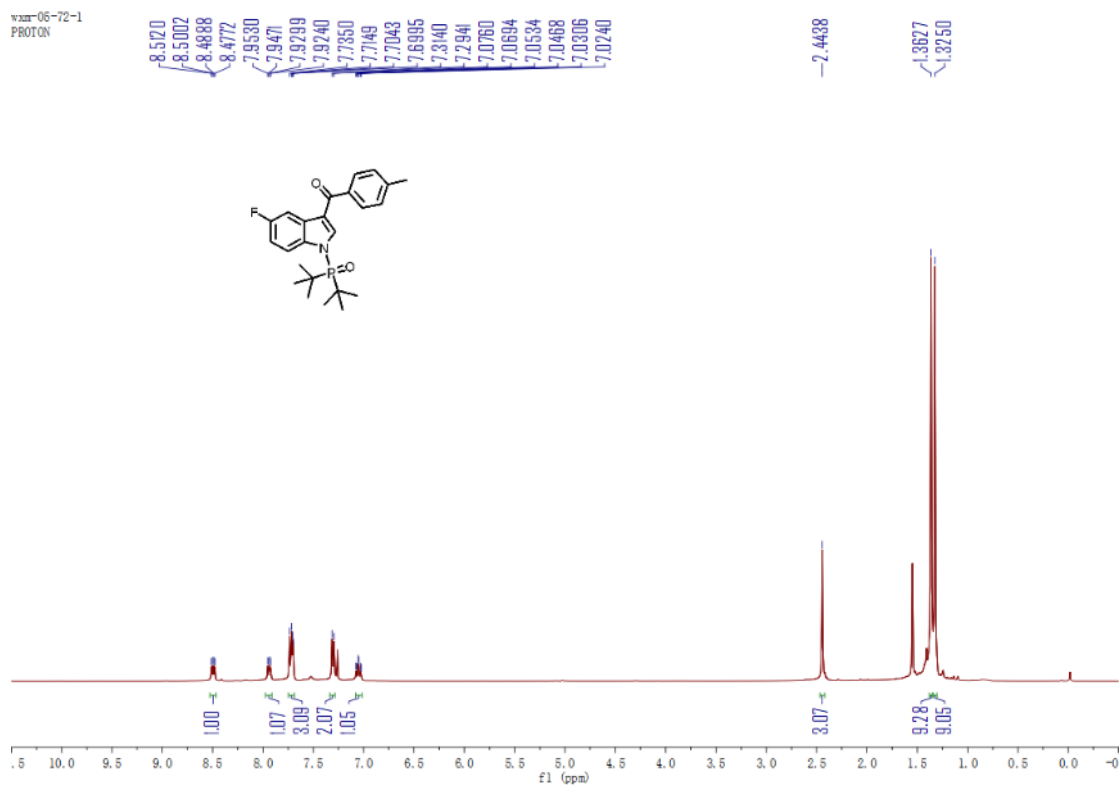

<sup>13</sup>C NMR spectrum (100 MHz, CDCl<sub>3</sub>) of compound **3w**

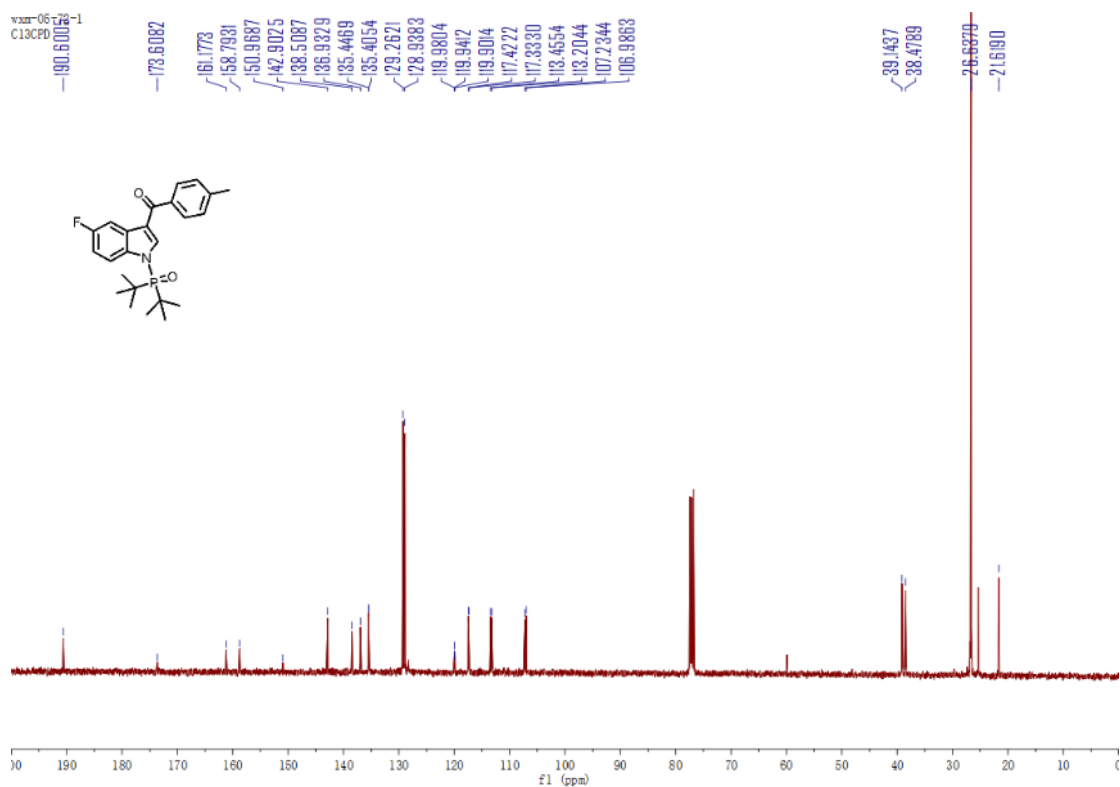

<sup>31</sup>P NMR spectrum (162 MHz, CDCl<sub>3</sub>) of compound **3w**

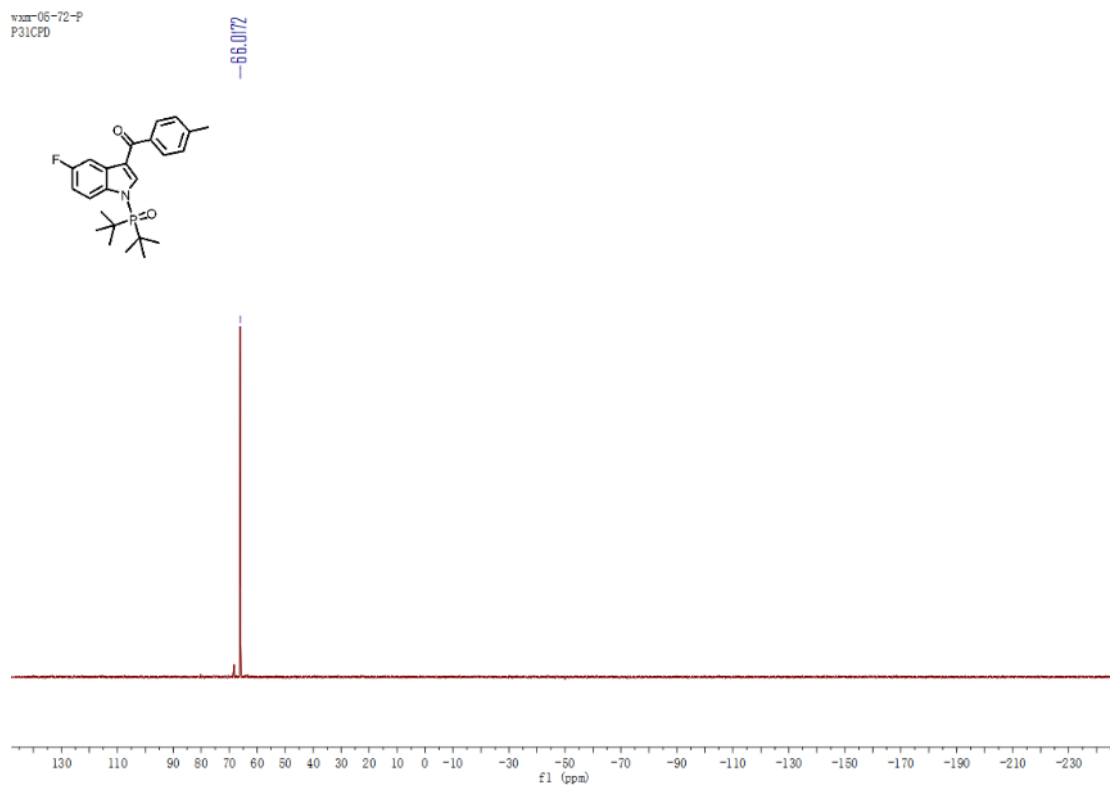

<sup>1</sup>H NMR spectrum (400 MHz, CDCl<sub>3</sub>) of compound **3x**

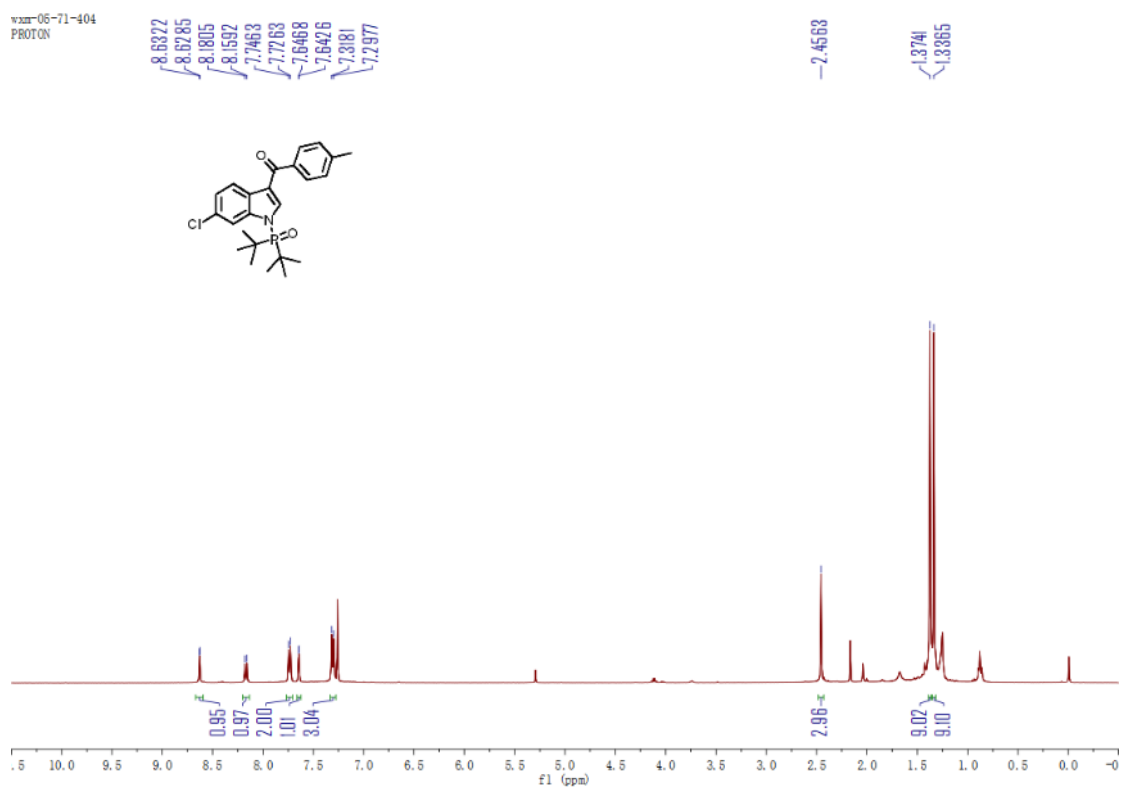

<sup>13</sup>C NMR spectrum (100 MHz, CDCl<sub>3</sub>) of compound **3x**

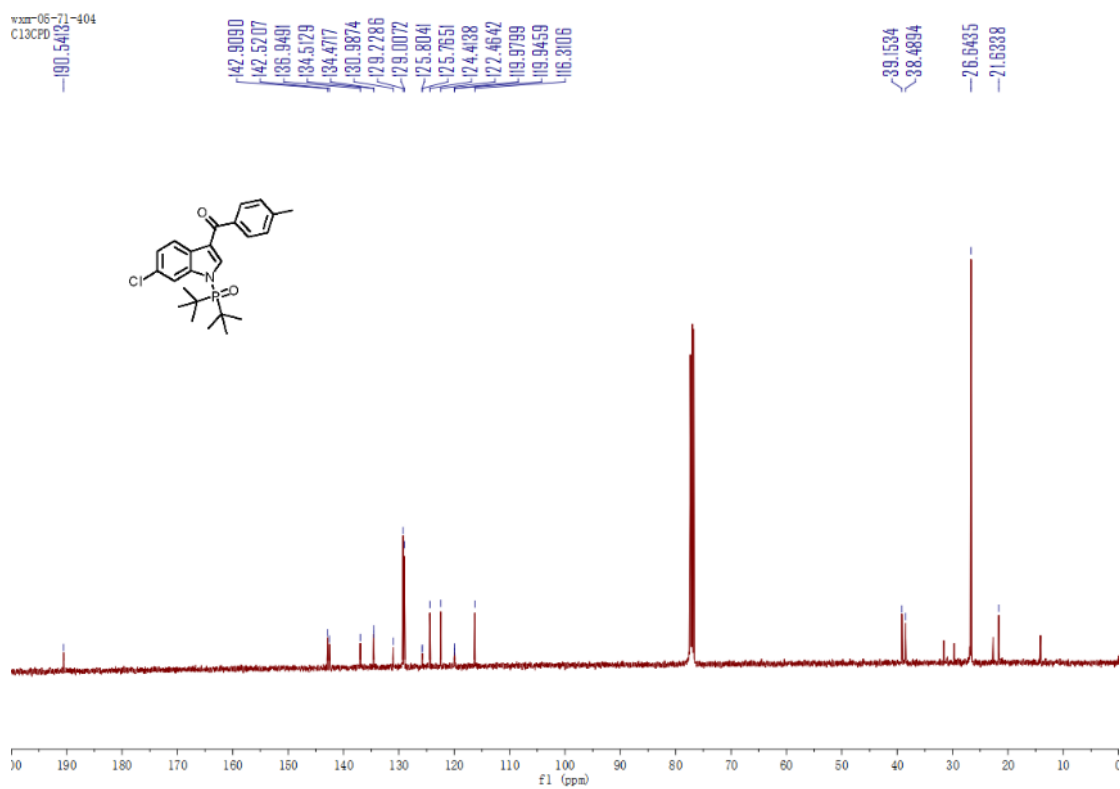

<sup>31</sup>P NMR spectrum (162 MHz, CDCl<sub>3</sub>) of compound **3x**

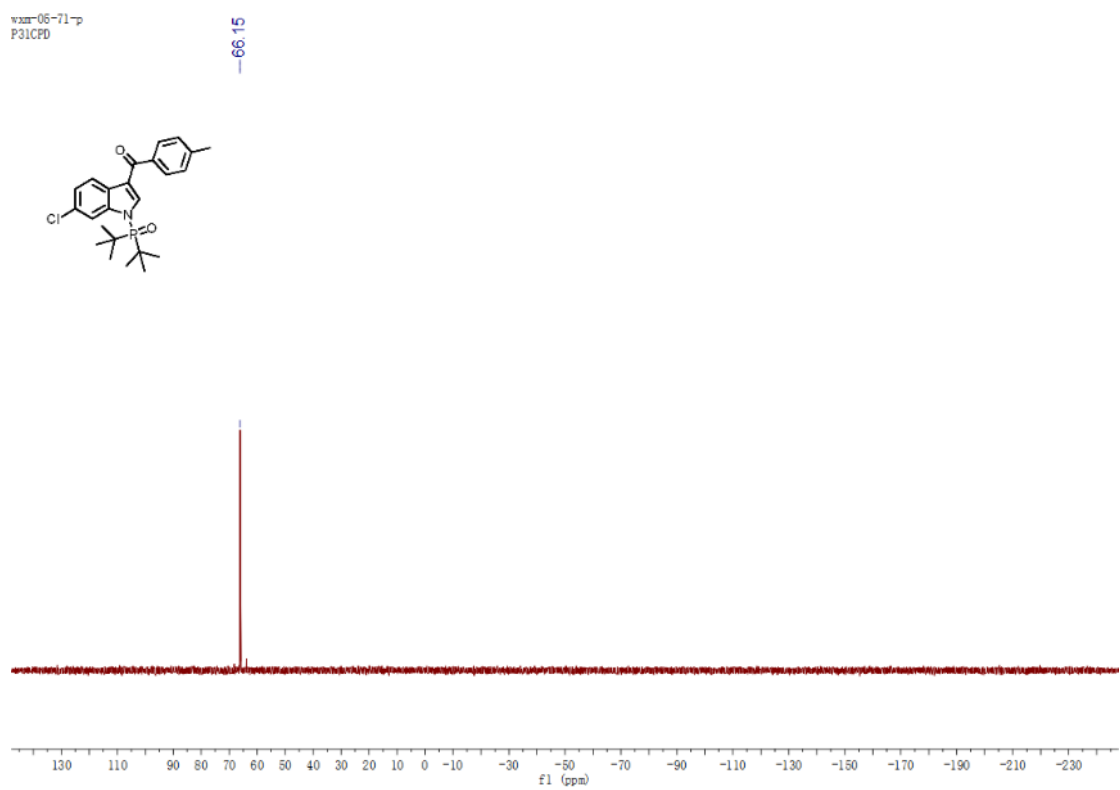

<sup>1</sup>H NMR spectrum (400 MHz, CDCl<sub>3</sub>) of compound **3y**

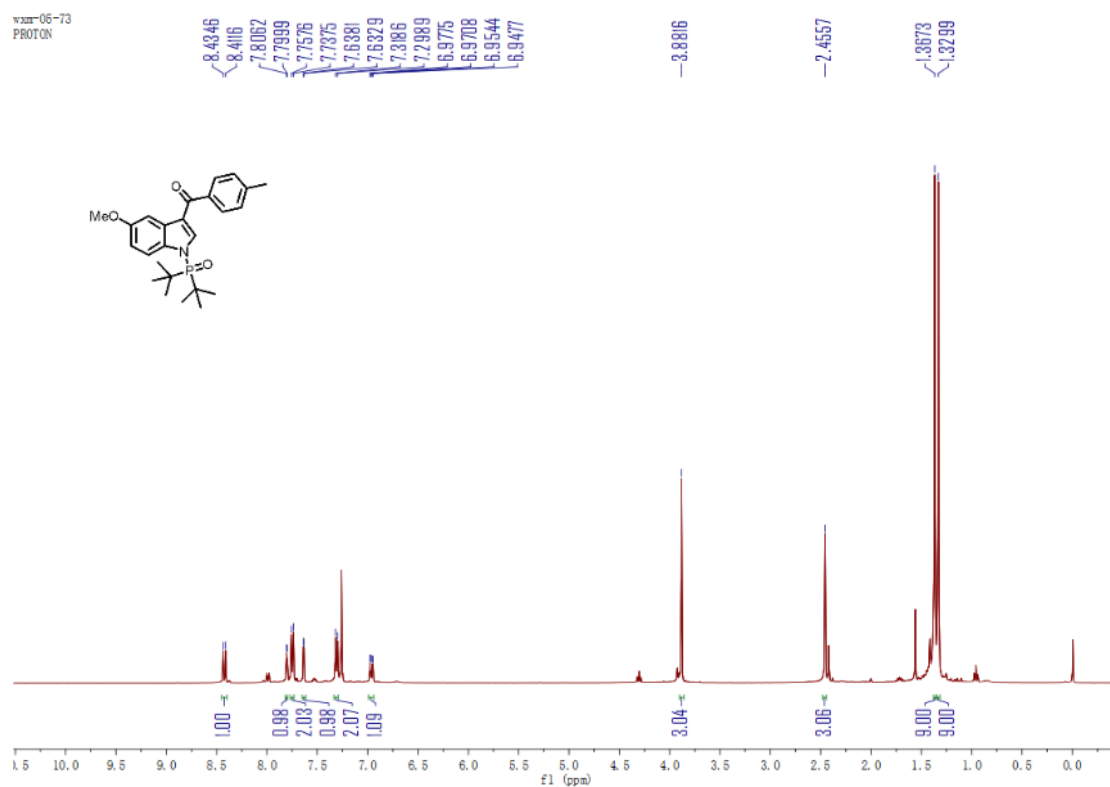

<sup>13</sup>C NMR spectrum (100 MHz, CDCl<sub>3</sub>) of compound **3y**

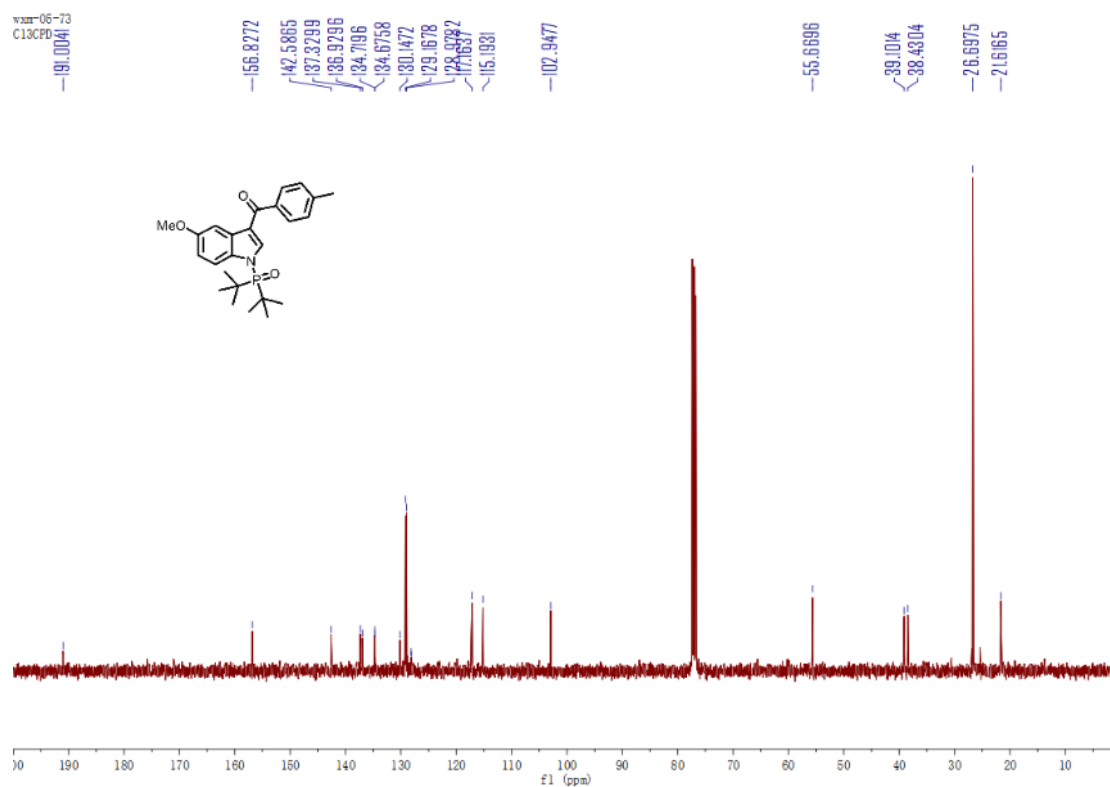

<sup>31</sup>P NMR spectrum (162 MHz, CDCl<sub>3</sub>) of compound **3y**

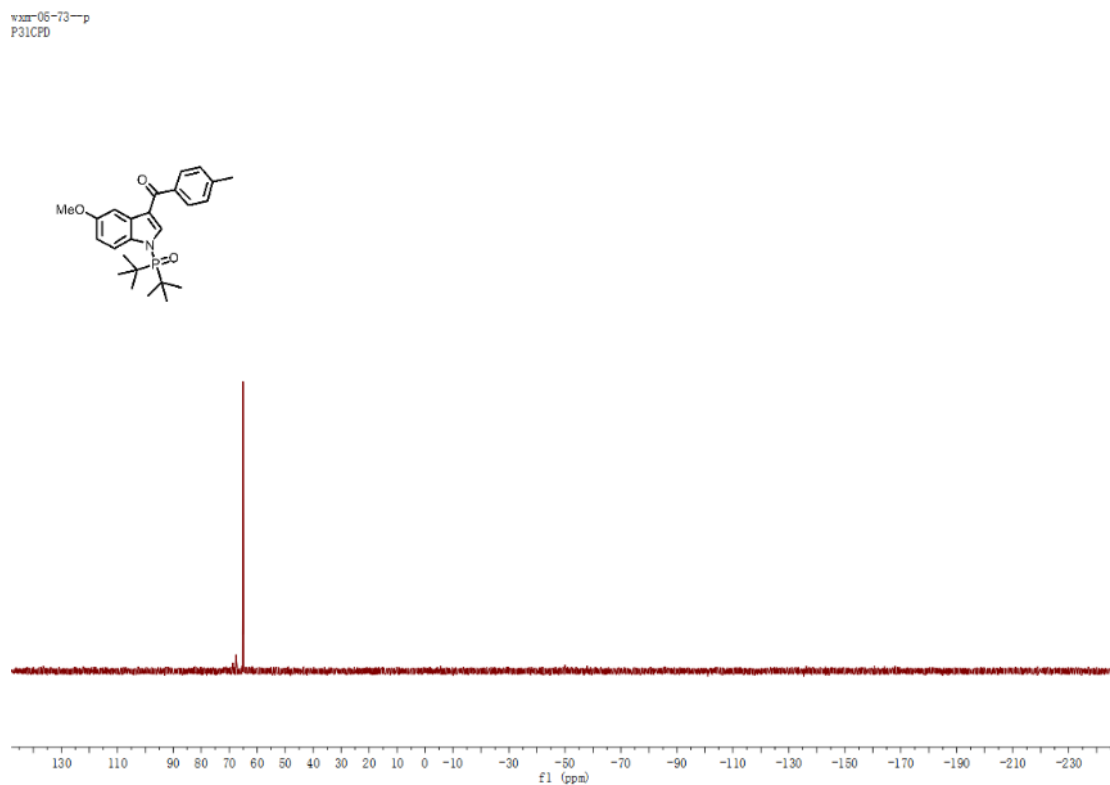

<sup>1</sup>H NMR spectrum (400 MHz, CDCl<sub>3</sub>) of compound **3z**

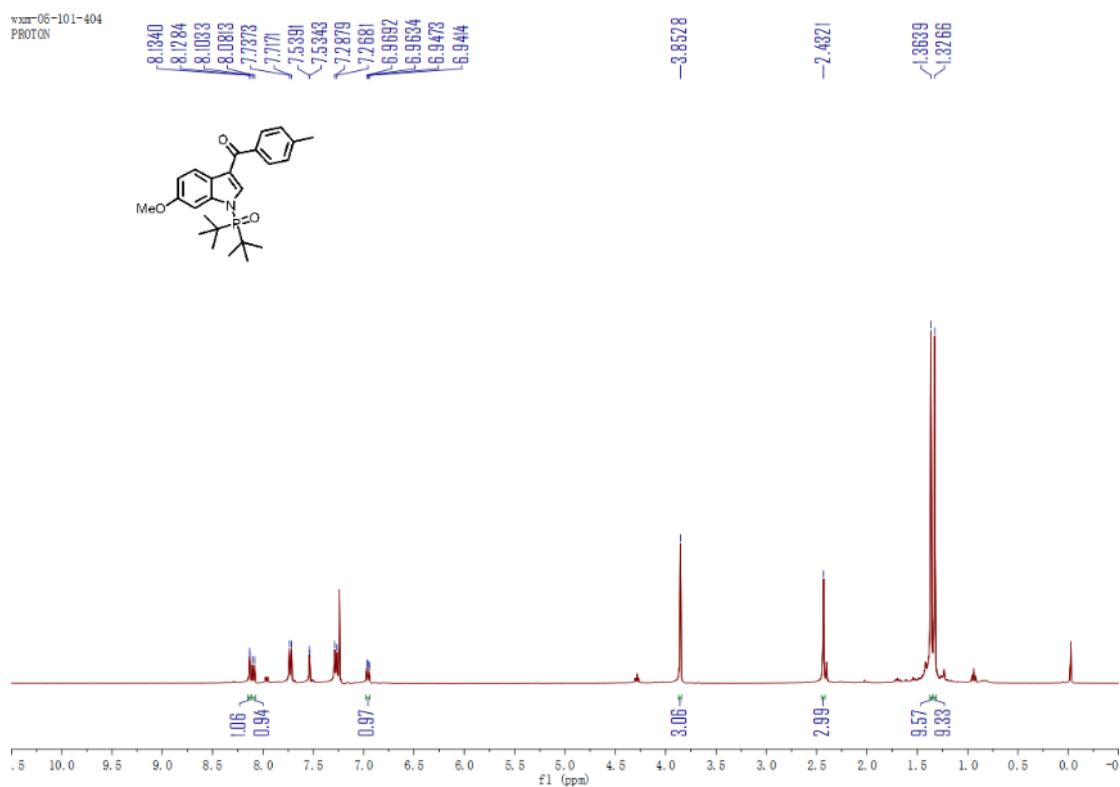



<sup>13</sup>C NMR spectrum (100 MHz, CDCl<sub>3</sub>) of compound **3z**

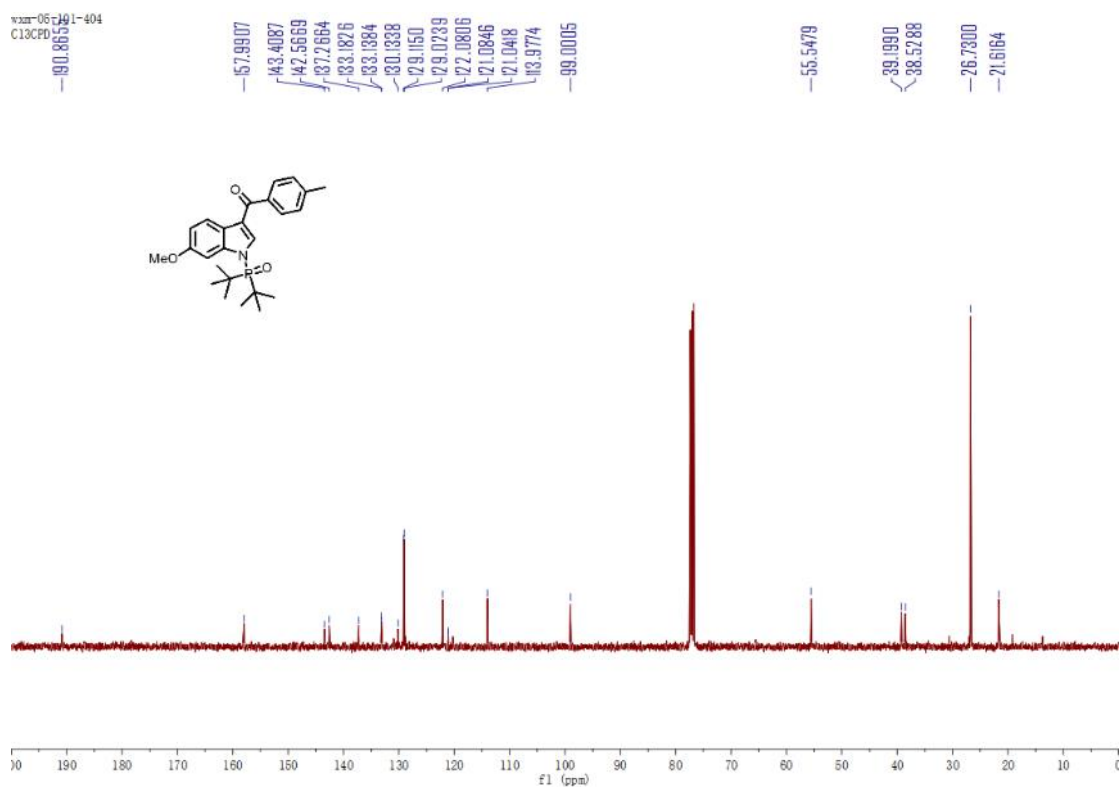

<sup>31</sup>P NMR spectrum (162 MHz, CDCl<sub>3</sub>) of compound **3z**

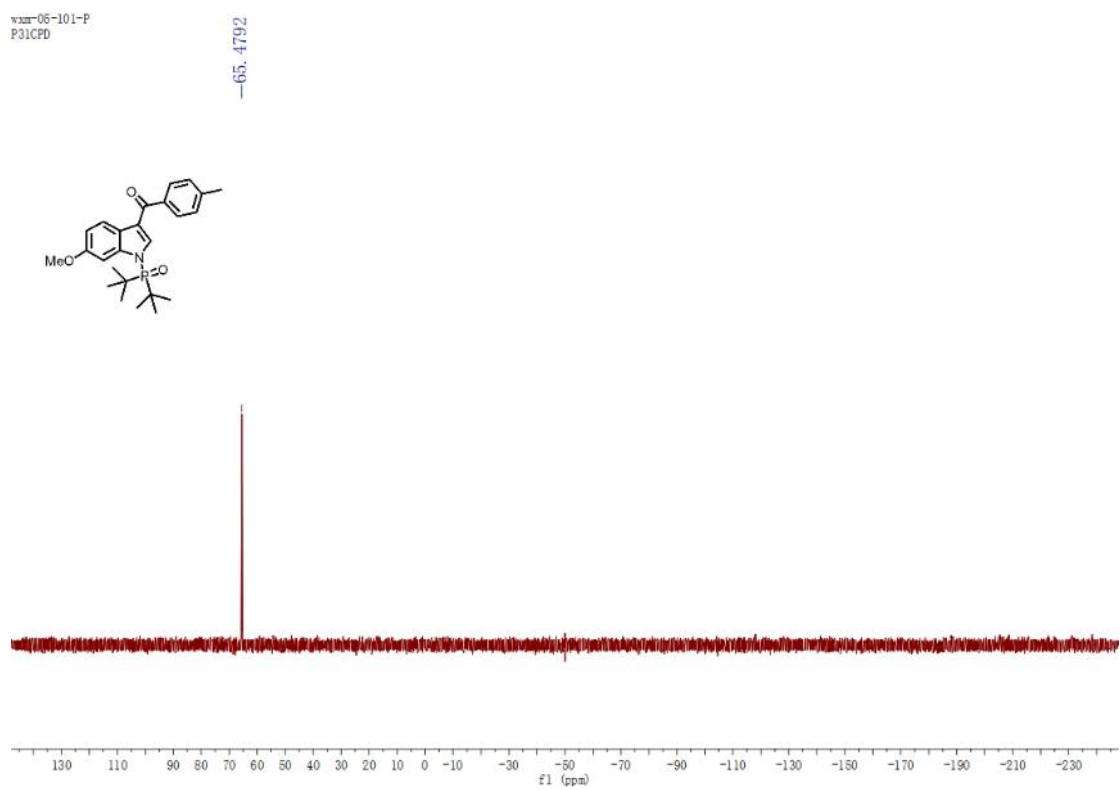

<sup>1</sup>H NMR spectrum (400 MHz, CDCl<sub>3</sub>) of compound **3aa**

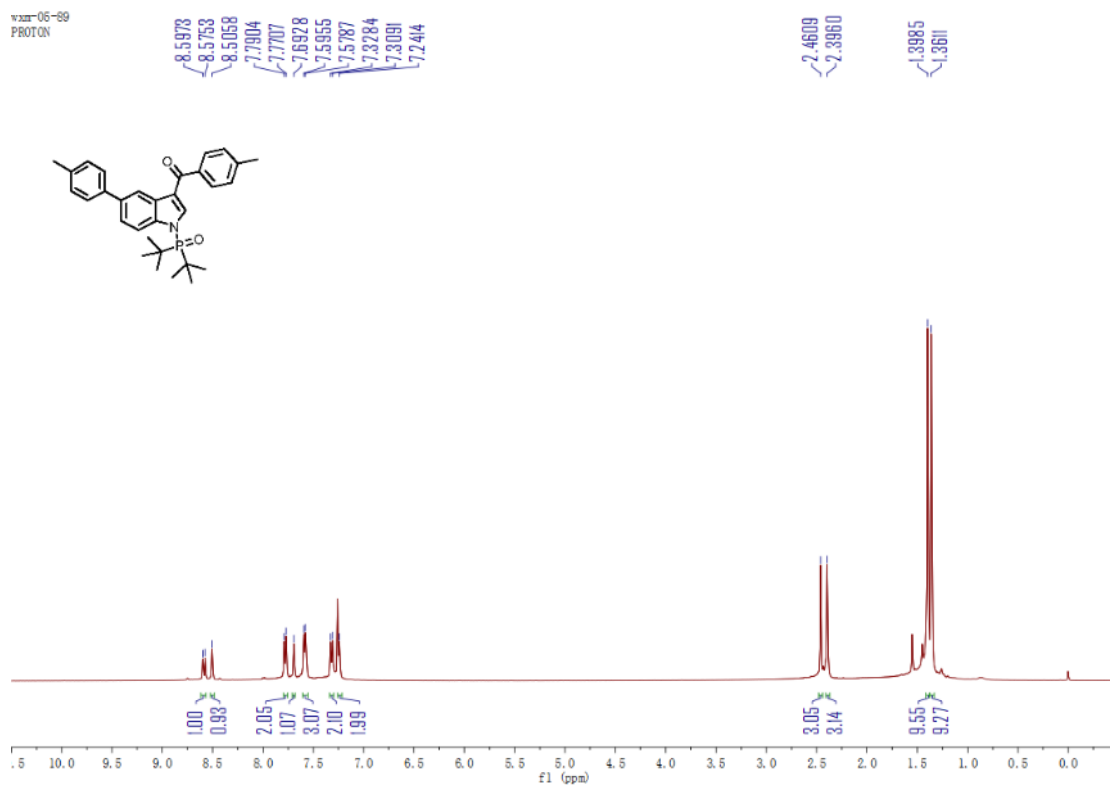

<sup>13</sup>C NMR spectrum (100 MHz, CDCl<sub>3</sub>) of compound **3aa**

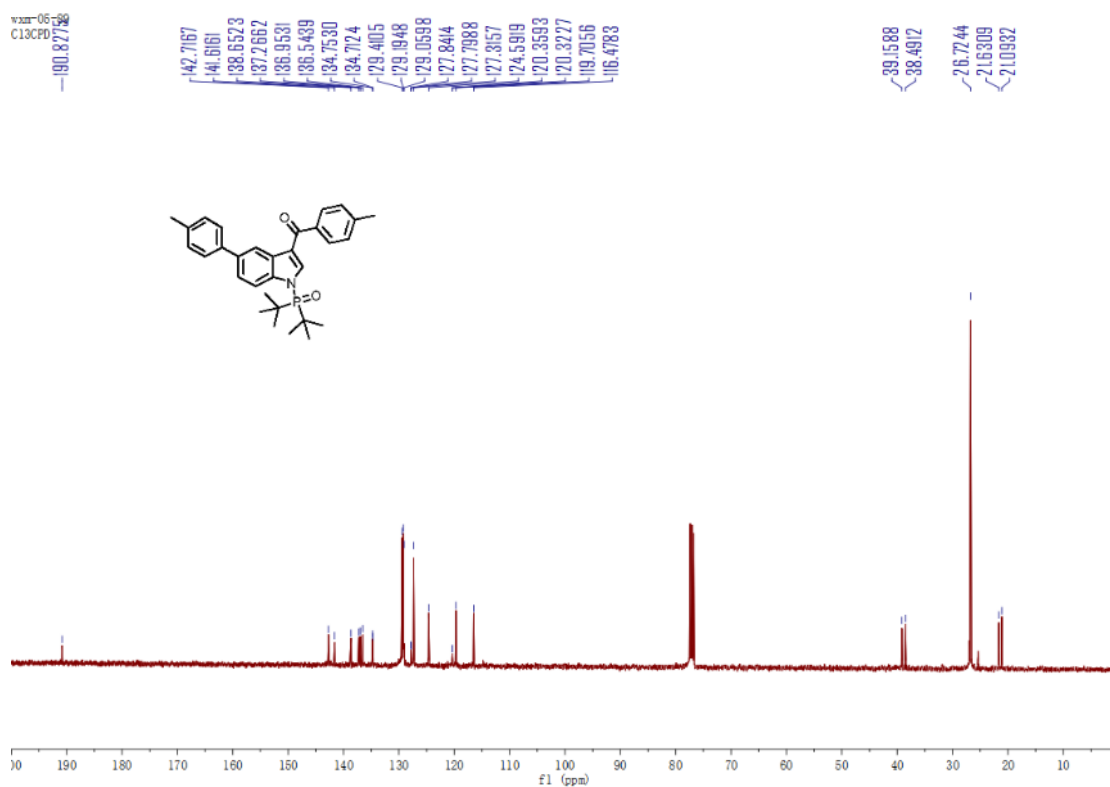

<sup>31</sup>P NMR spectrum (162 MHz, CDCl<sub>3</sub>) of compound **3aa**

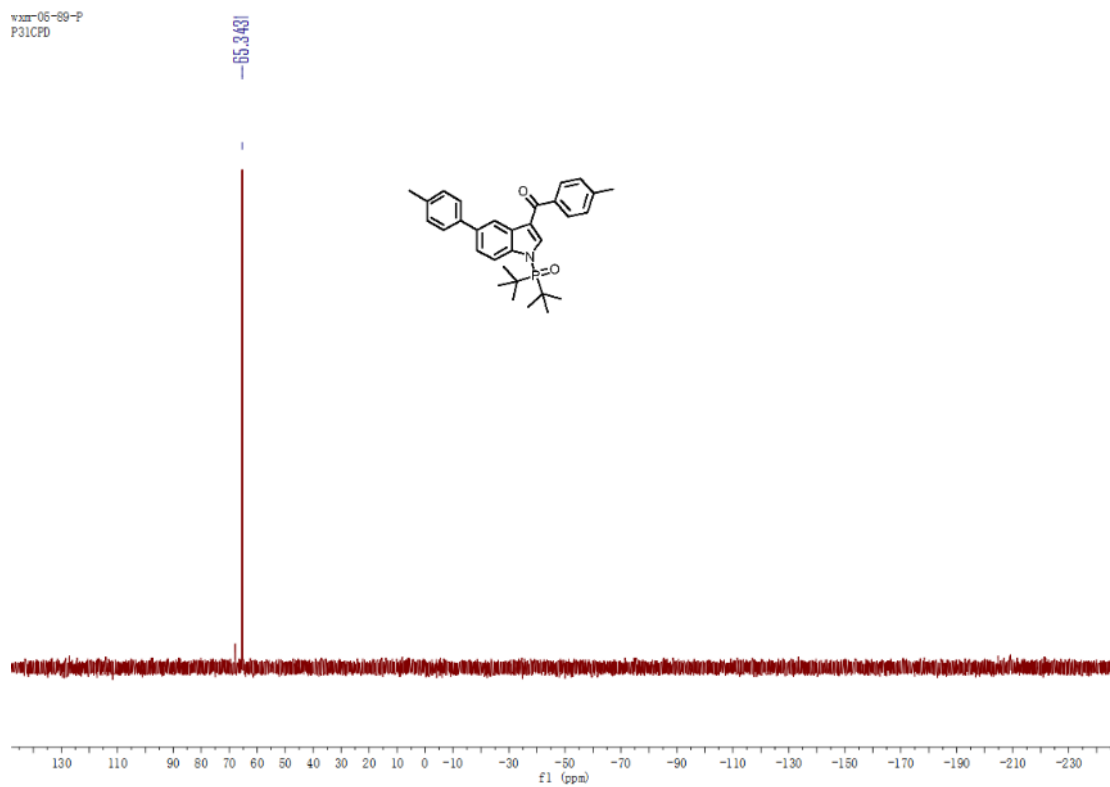

<sup>1</sup>H NMR spectrum (400 MHz, CDCl<sub>3</sub>) of compound **3bb**

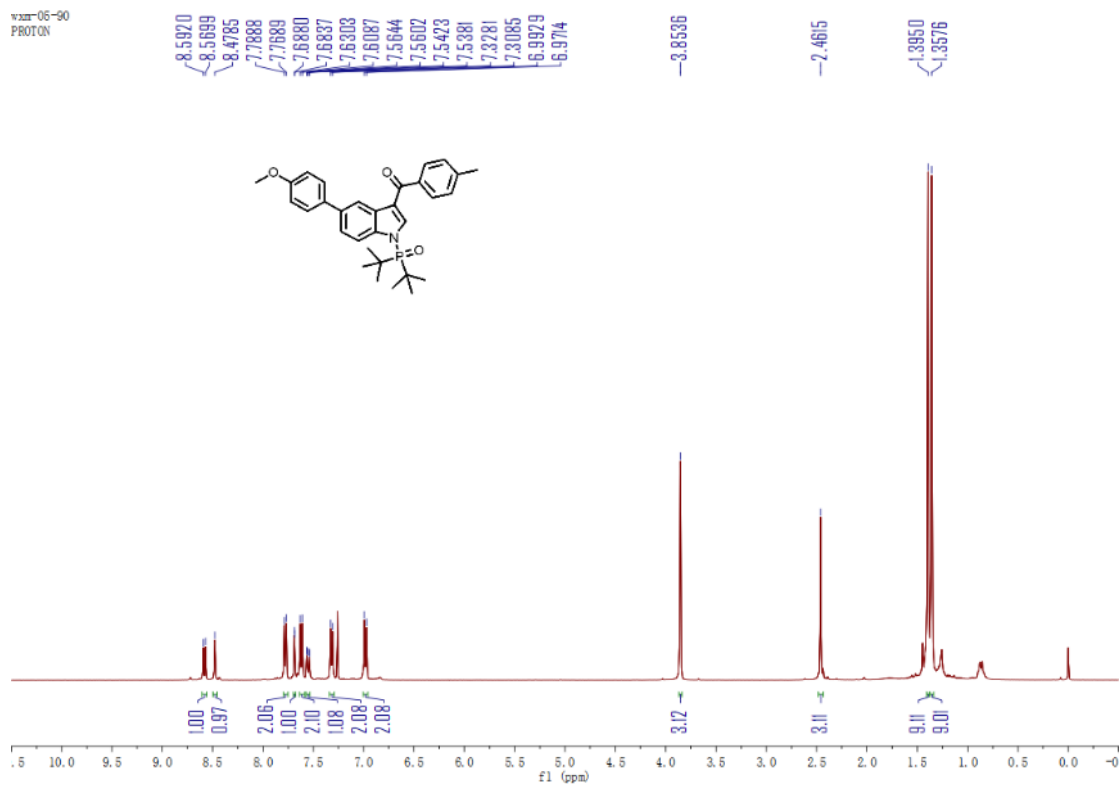

$^{13}\text{C}$  NMR spectrum (100 MHz,  $\text{CDCl}_3$ ) of compound **3bb**

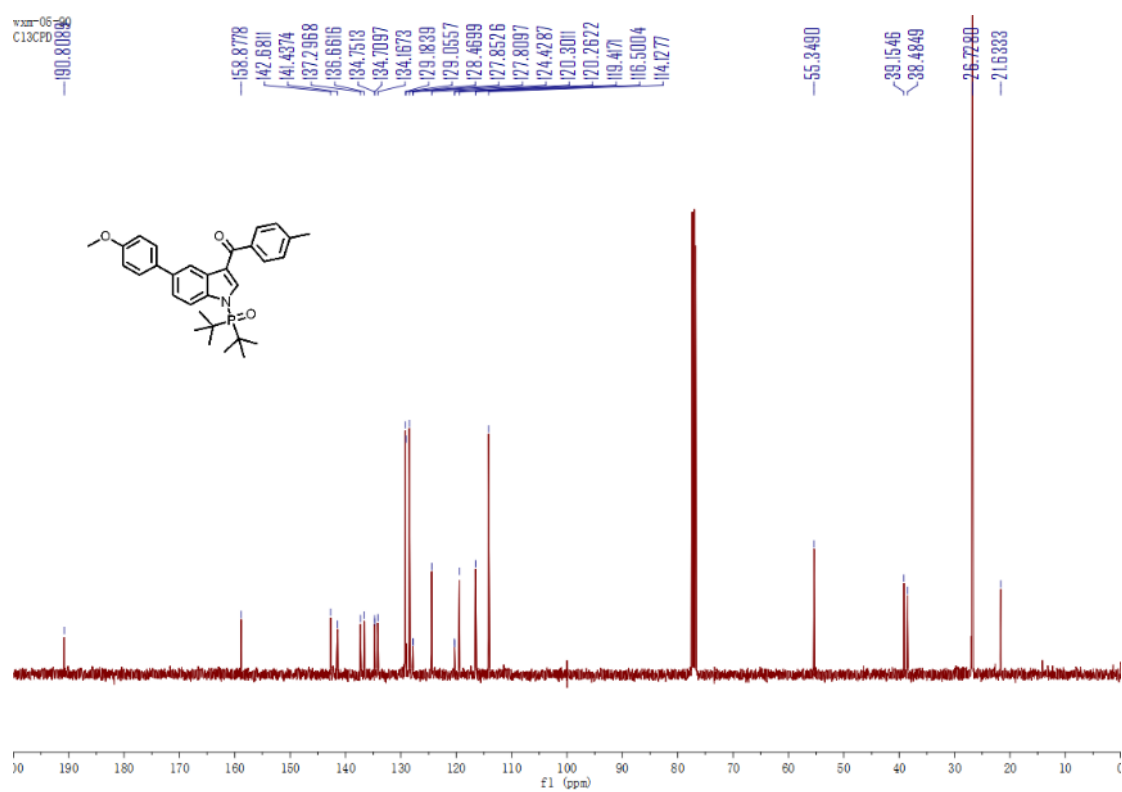

$^{31}\text{P}$  NMR spectrum (162 MHz,  $\text{CDCl}_3$ ) of compound **3bb**

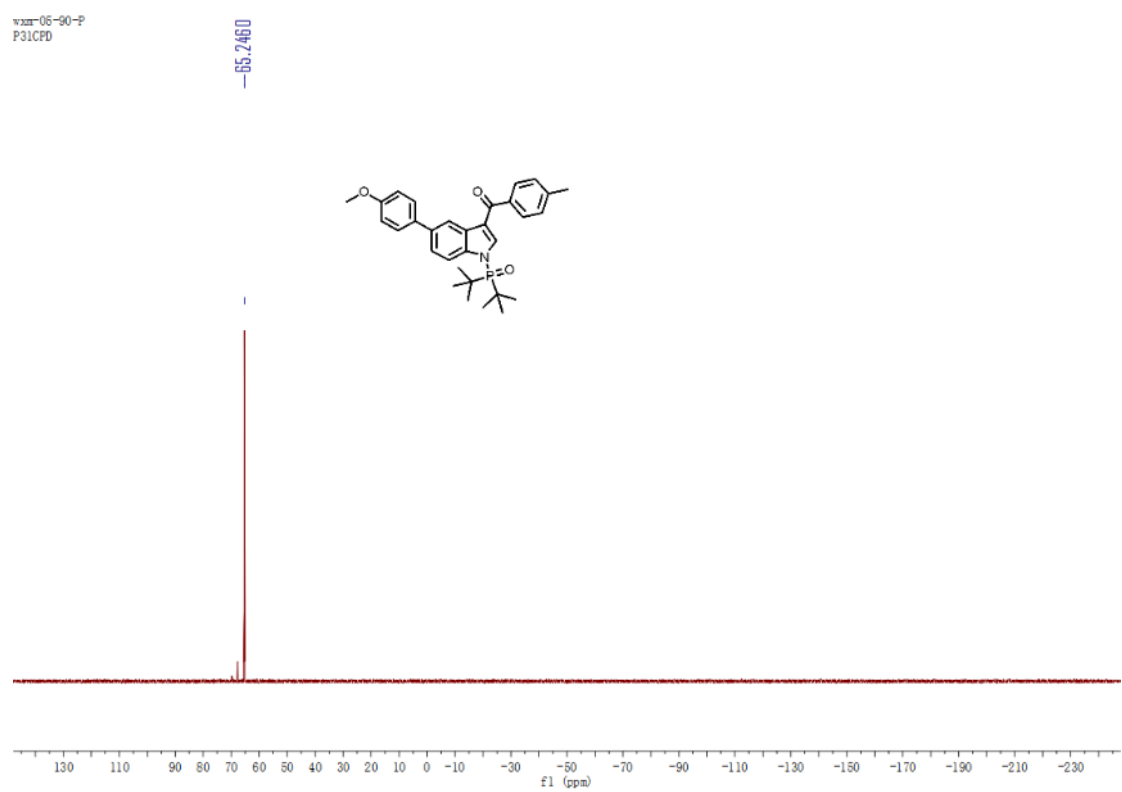

<sup>1</sup>H NMR spectrum (400 MHz, CDCl<sub>3</sub>) of compound **3cc**

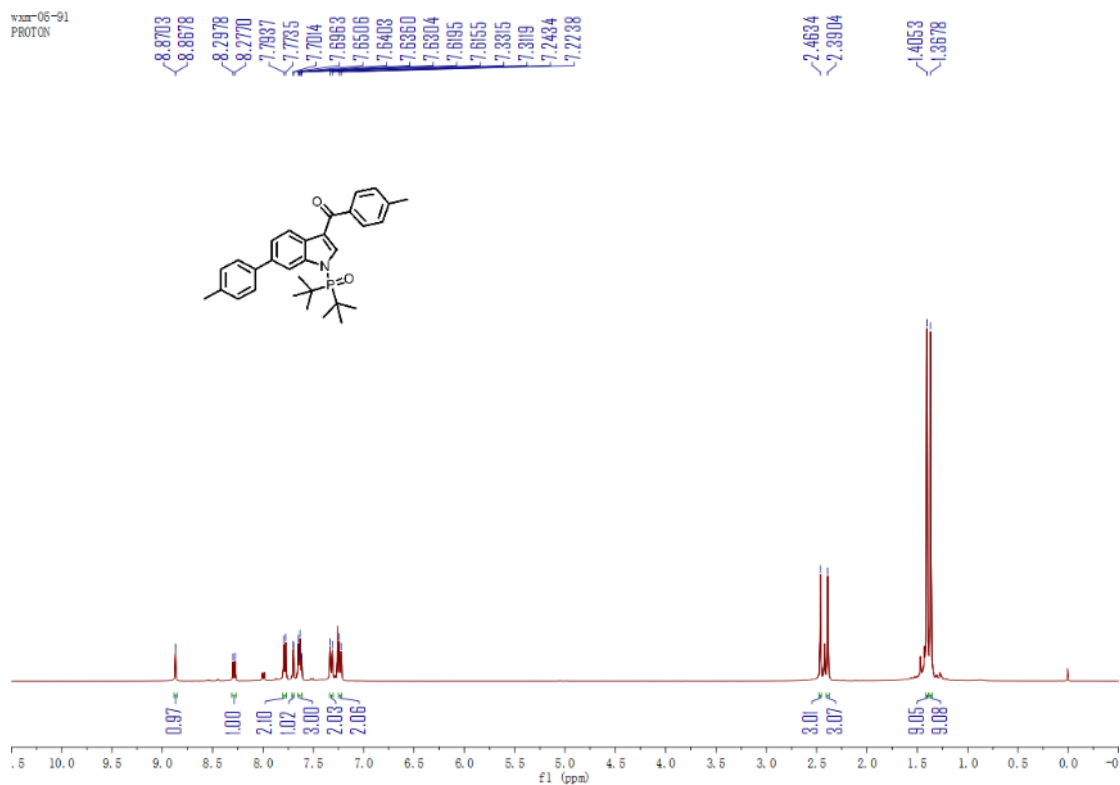

<sup>13</sup>C NMR spectrum (100 MHz, CDCl<sub>3</sub>) of compound **3cc**

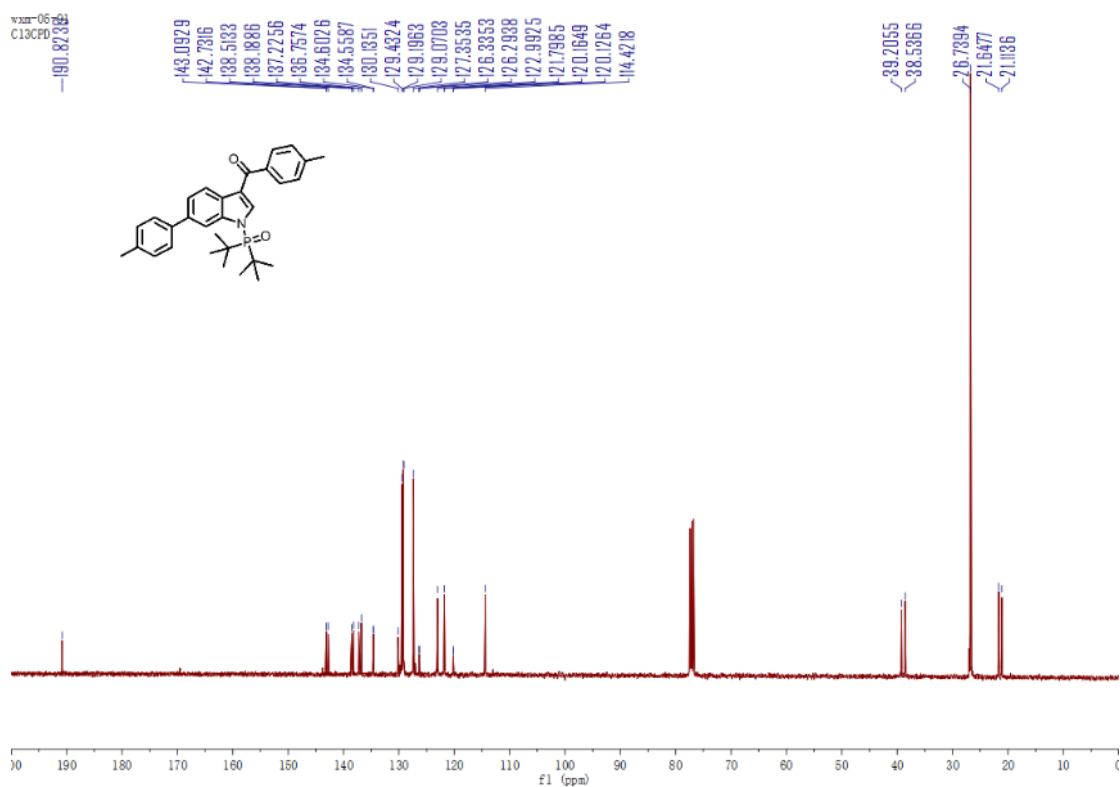

<sup>31</sup>P NMR spectrum (162 MHz, CDCl<sub>3</sub>) of compound **3cc**

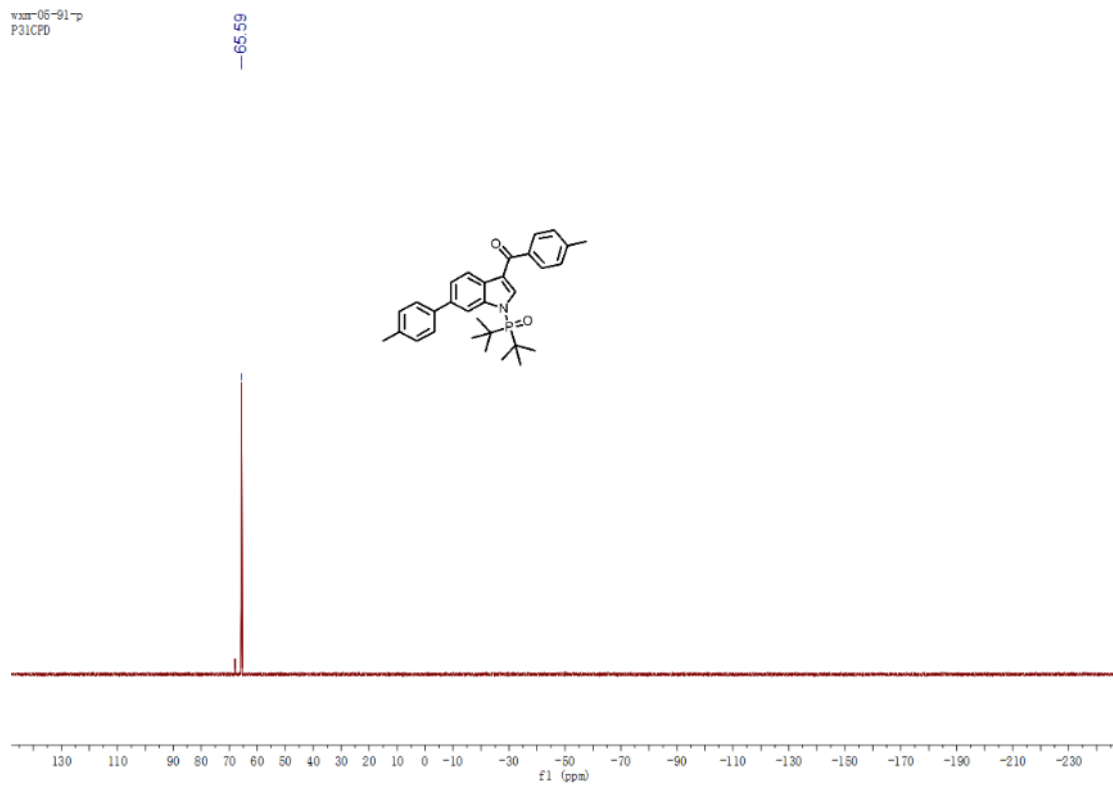

<sup>1</sup>H NMR spectrum (400 MHz, CDCl<sub>3</sub>) of compound **3dd**

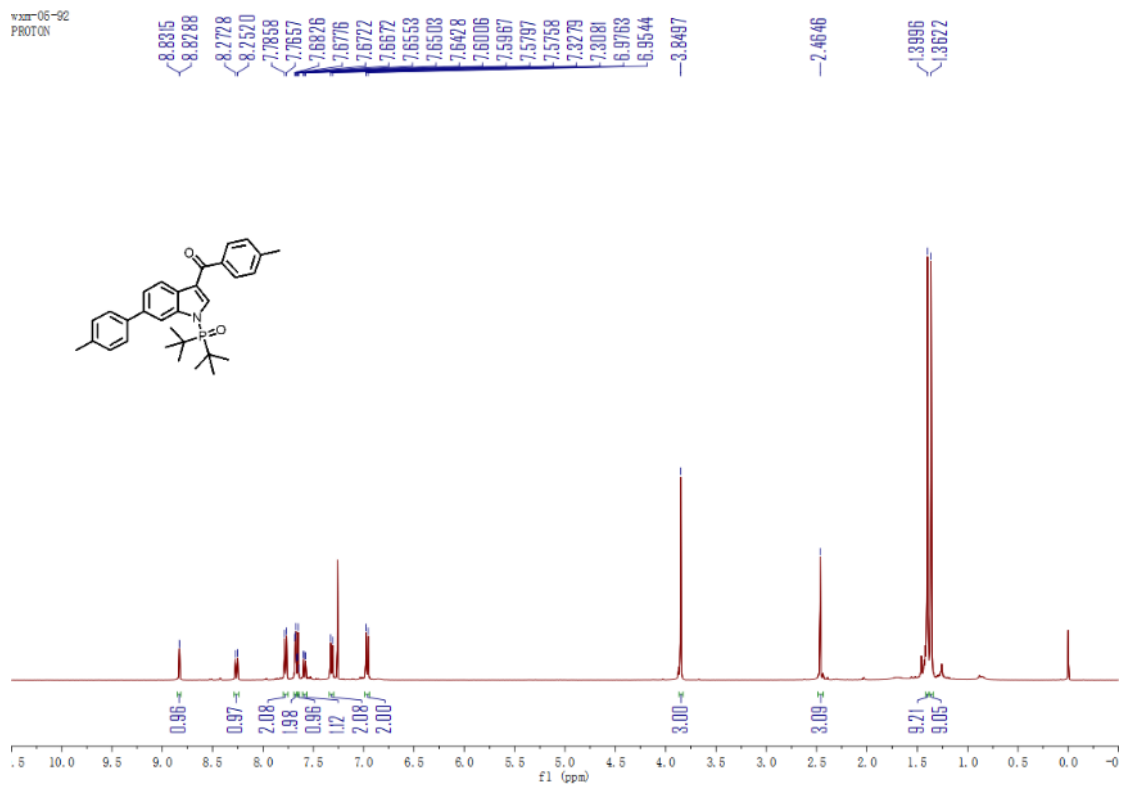

<sup>13</sup>C NMR spectrum (100 MHz, CDCl<sub>3</sub>) of compound **3dd**

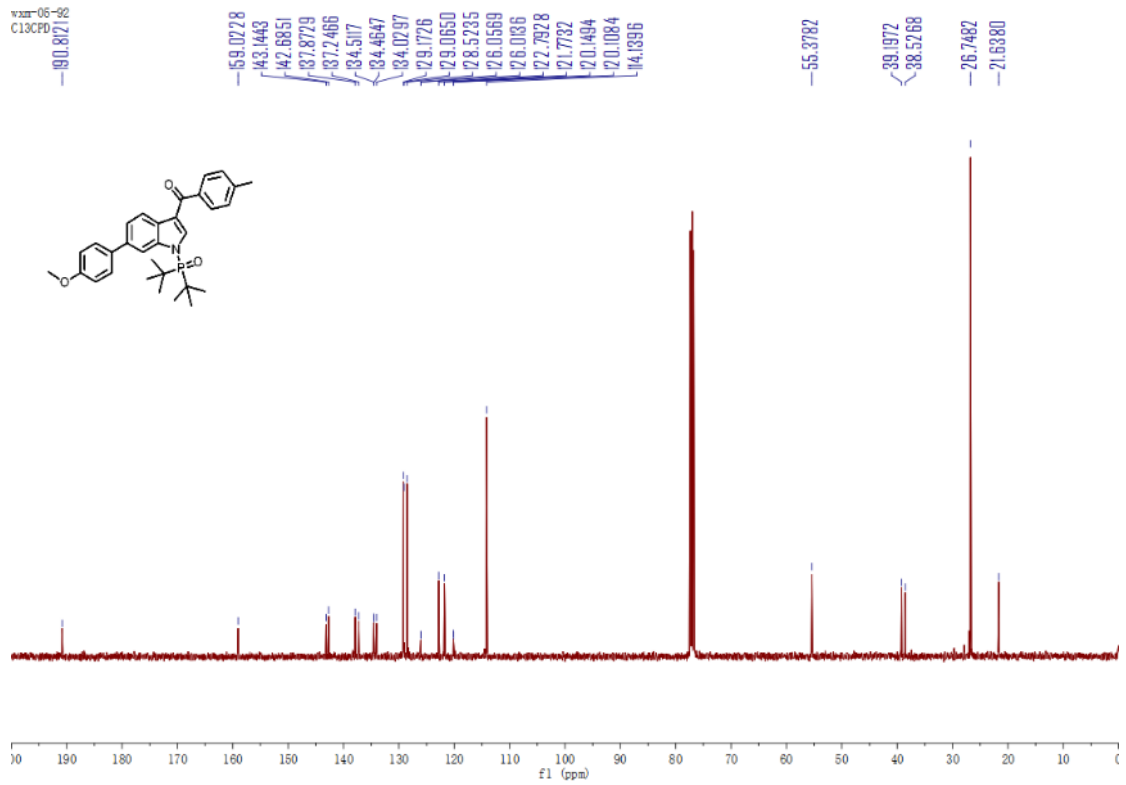

<sup>31</sup>P NMR spectrum (162 MHz, CDCl<sub>3</sub>) of compound **3dd**

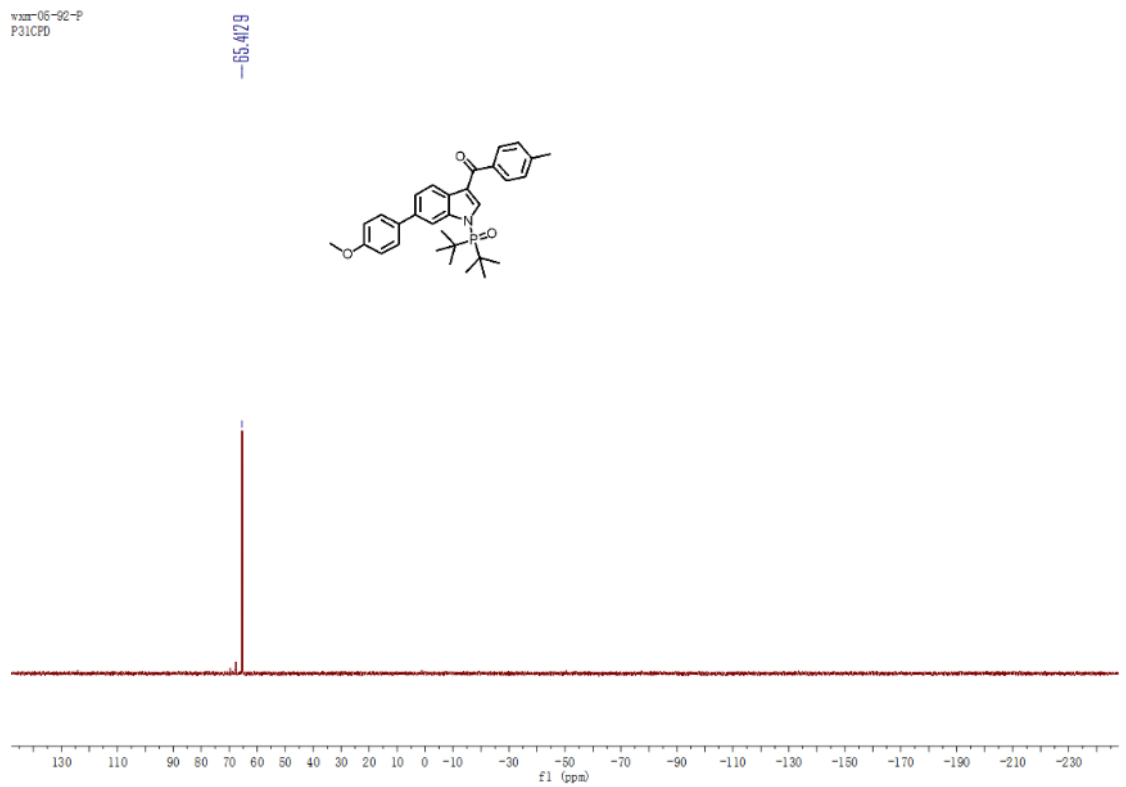

<sup>1</sup>H NMR spectrum (400 MHz, CDCl<sub>3</sub>) of compound 4

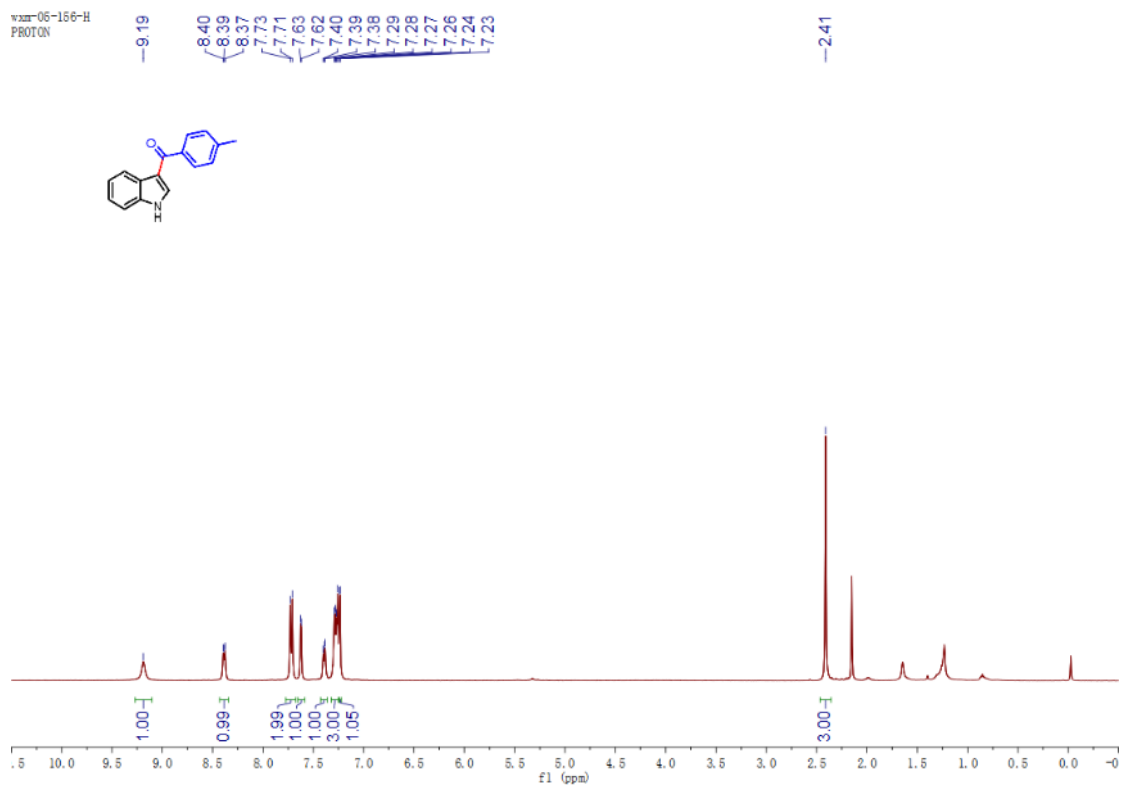

<sup>13</sup>C NMR spectrum (100 MHz, CDCl<sub>3</sub>) of compound 4

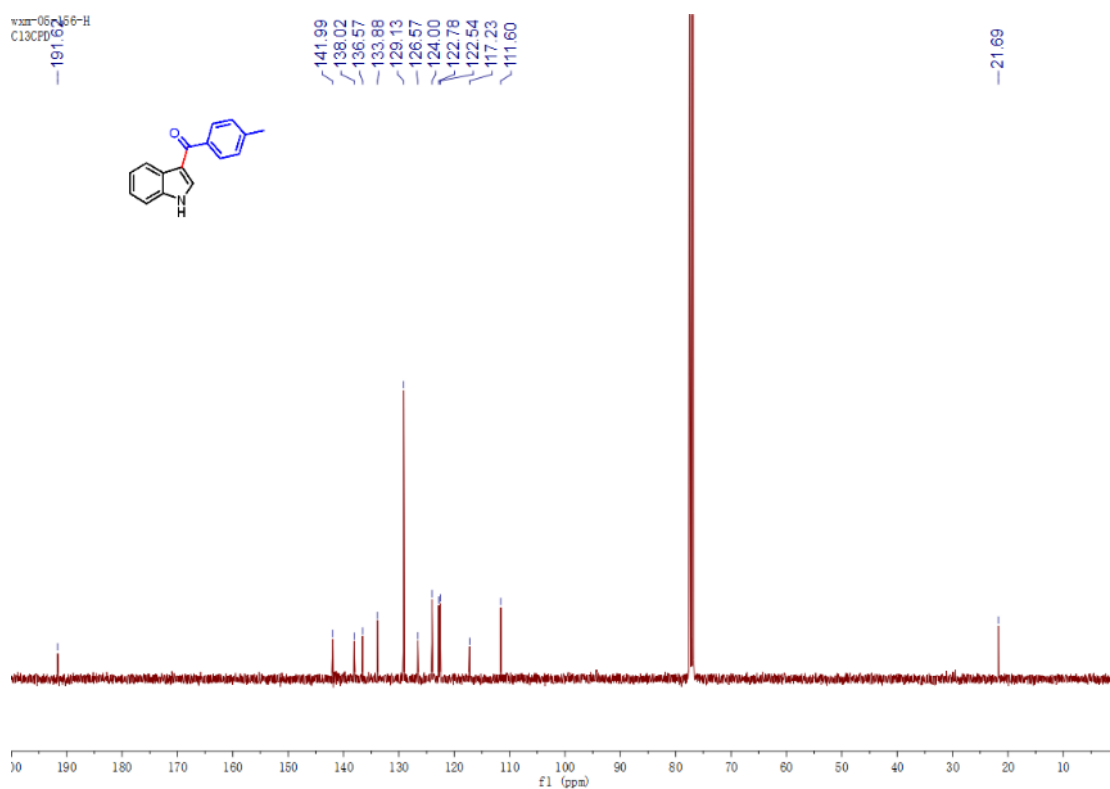



<sup>1</sup>H NMR spectrum (400 MHz, CDCl<sub>3</sub>) of compound **5**

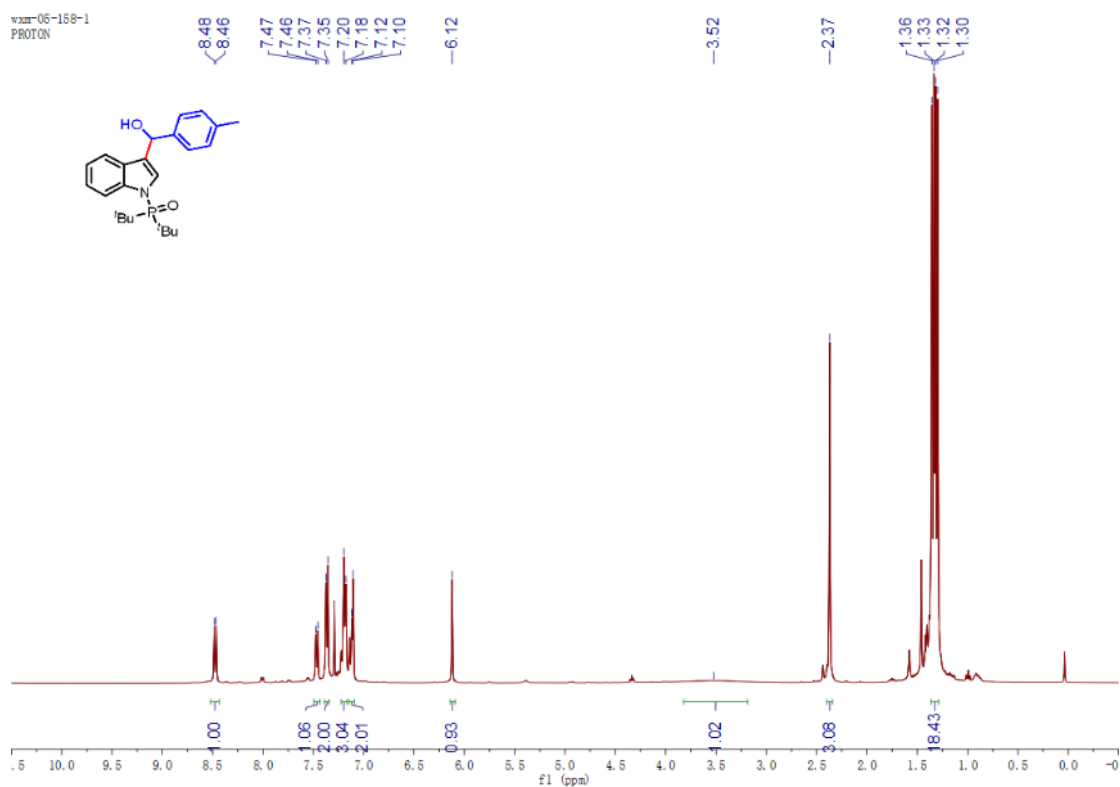

<sup>13</sup>C NMR spectrum (100 MHz, CDCl<sub>3</sub>) of compound **5**

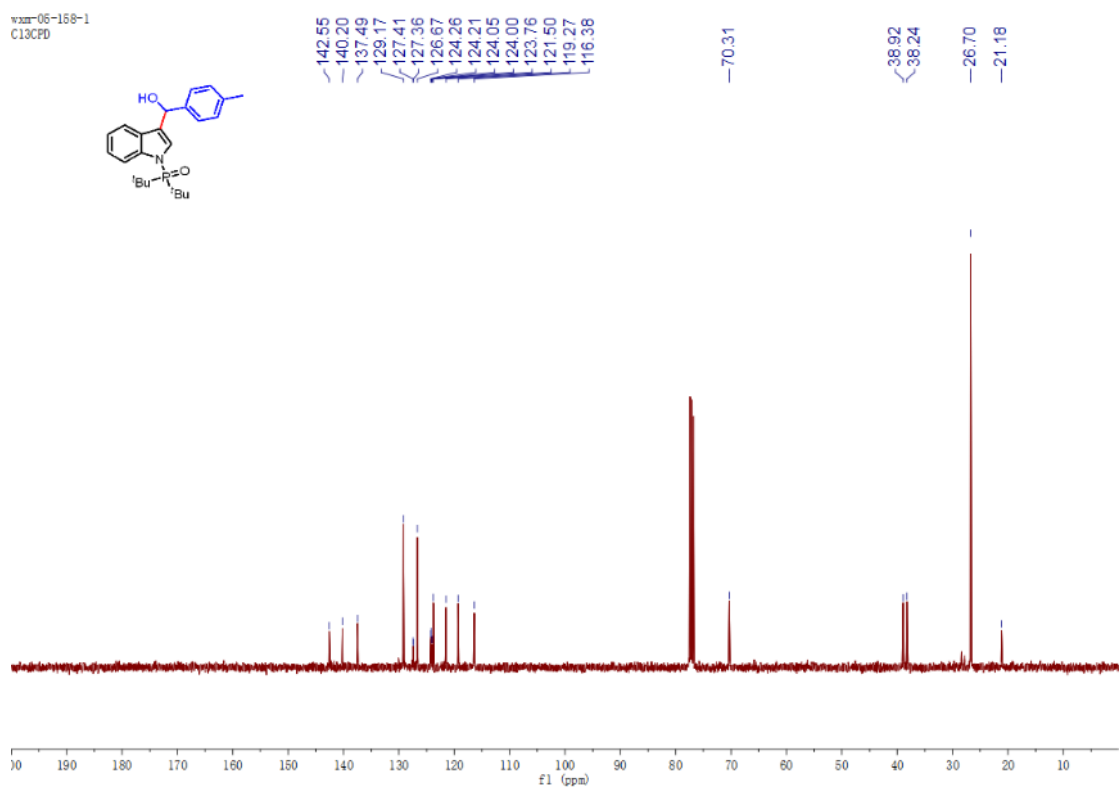

$^{31}\text{P}$  NMR spectrum (162 MHz,  $\text{CDCl}_3$ ) of compound **5**

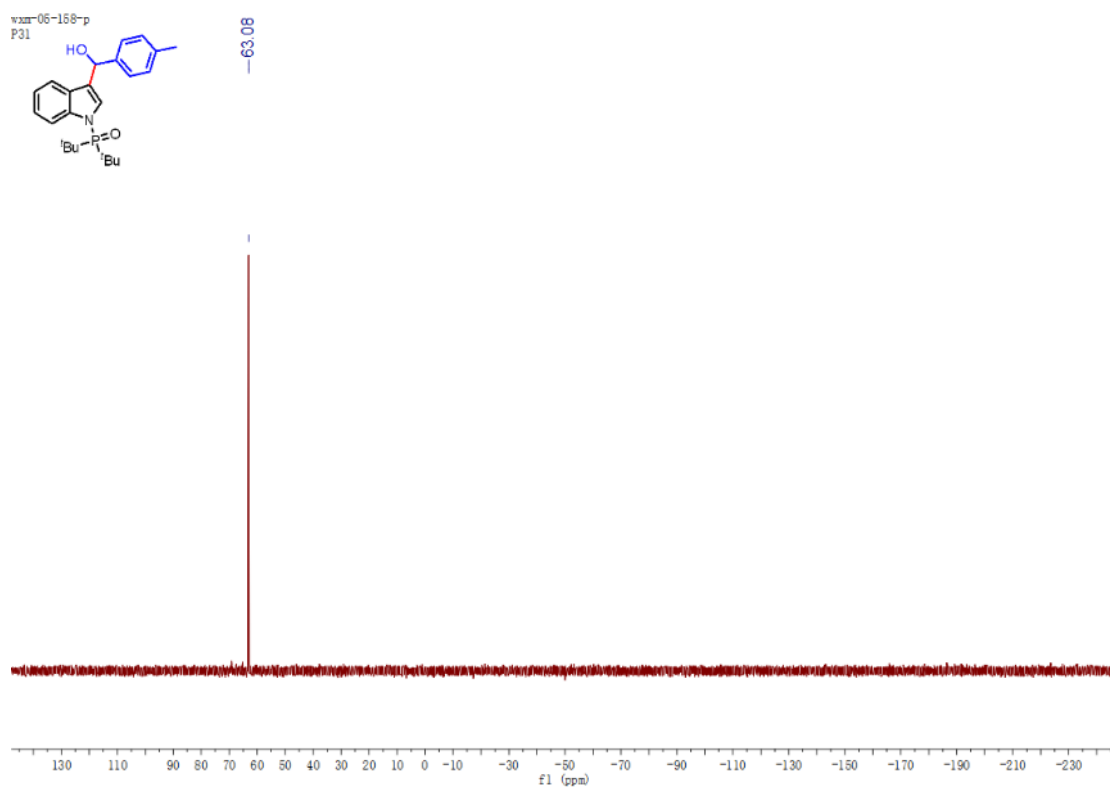

$^1\text{H}$  NMR spectrum (400 MHz,  $\text{CDCl}_3$ ) of compound **6**

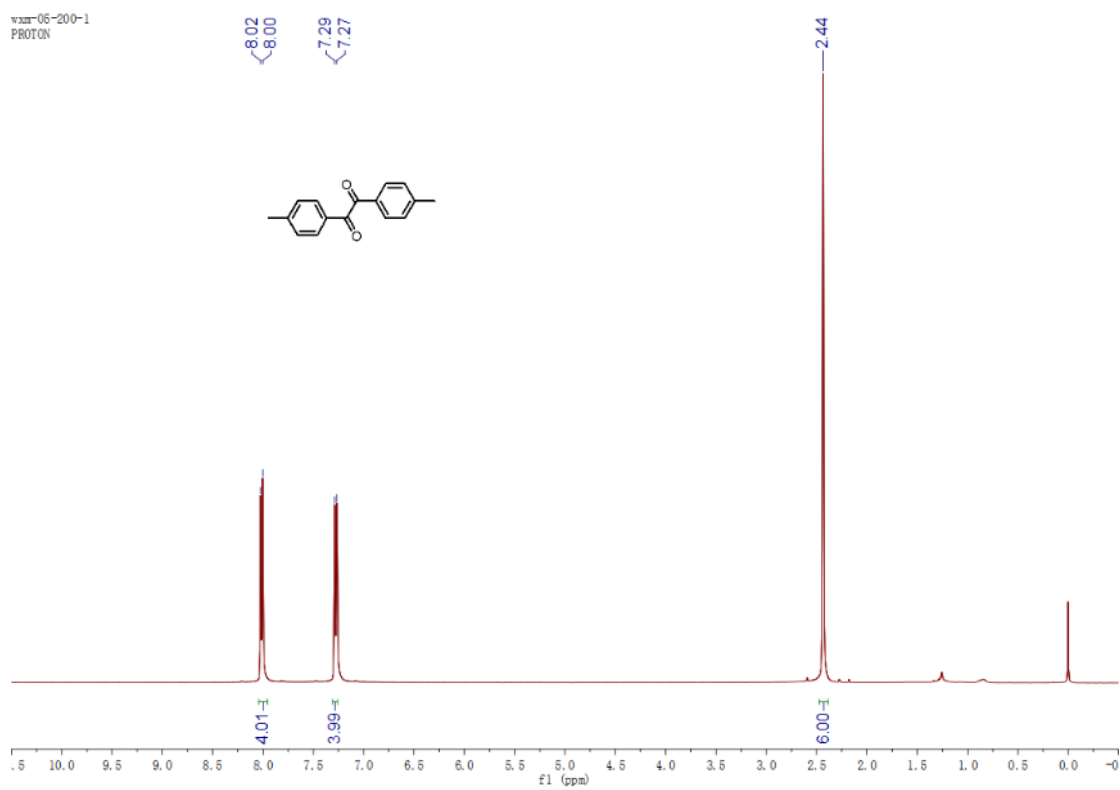

<sup>13</sup>C NMR spectrum (100 MHz, CDCl<sub>3</sub>) of compound **6**

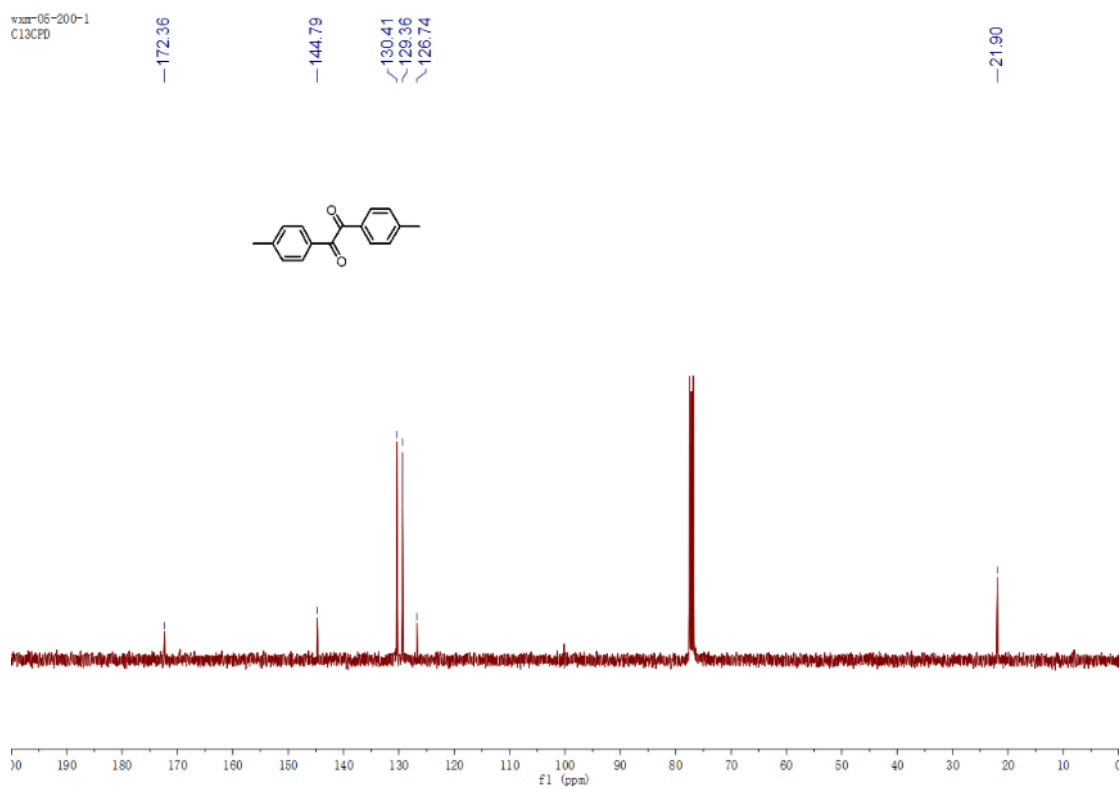

<sup>1</sup>H NMR spectrum (400 MHz, CDCl<sub>3</sub>) of compound **8**

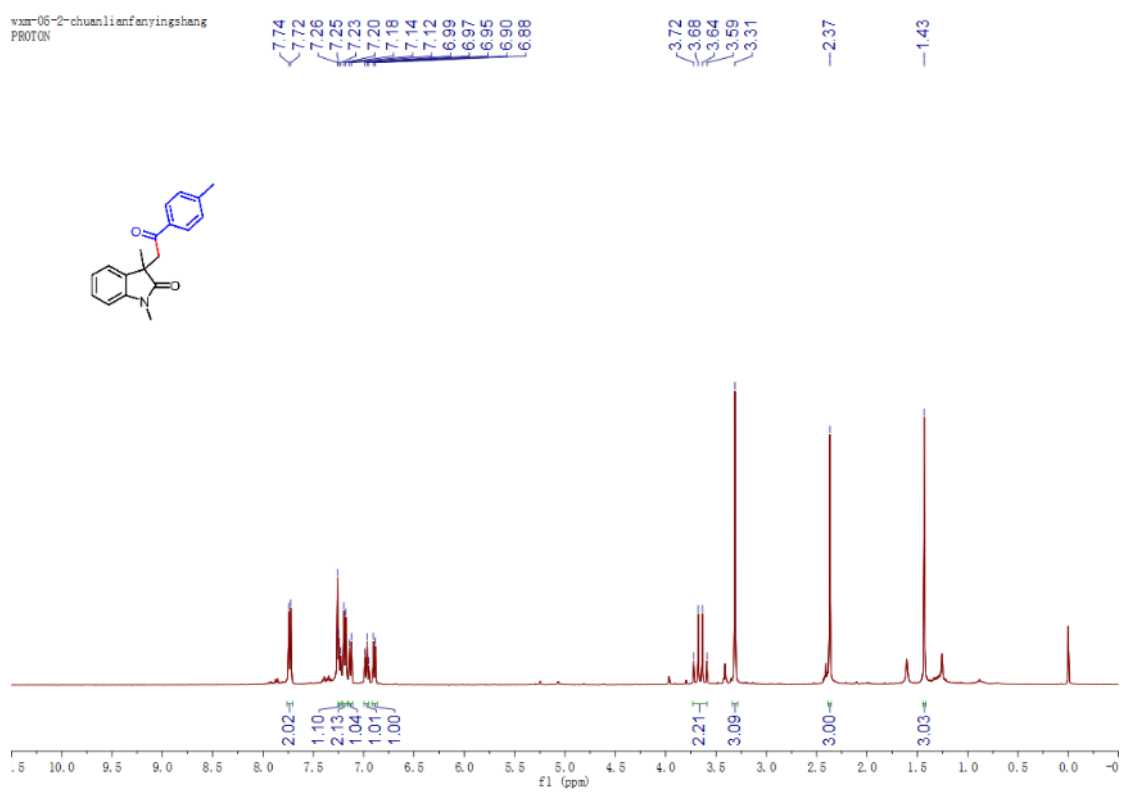

<sup>13</sup>C NMR spectrum (100 MHz, CDCl<sub>3</sub>) of compound **8**

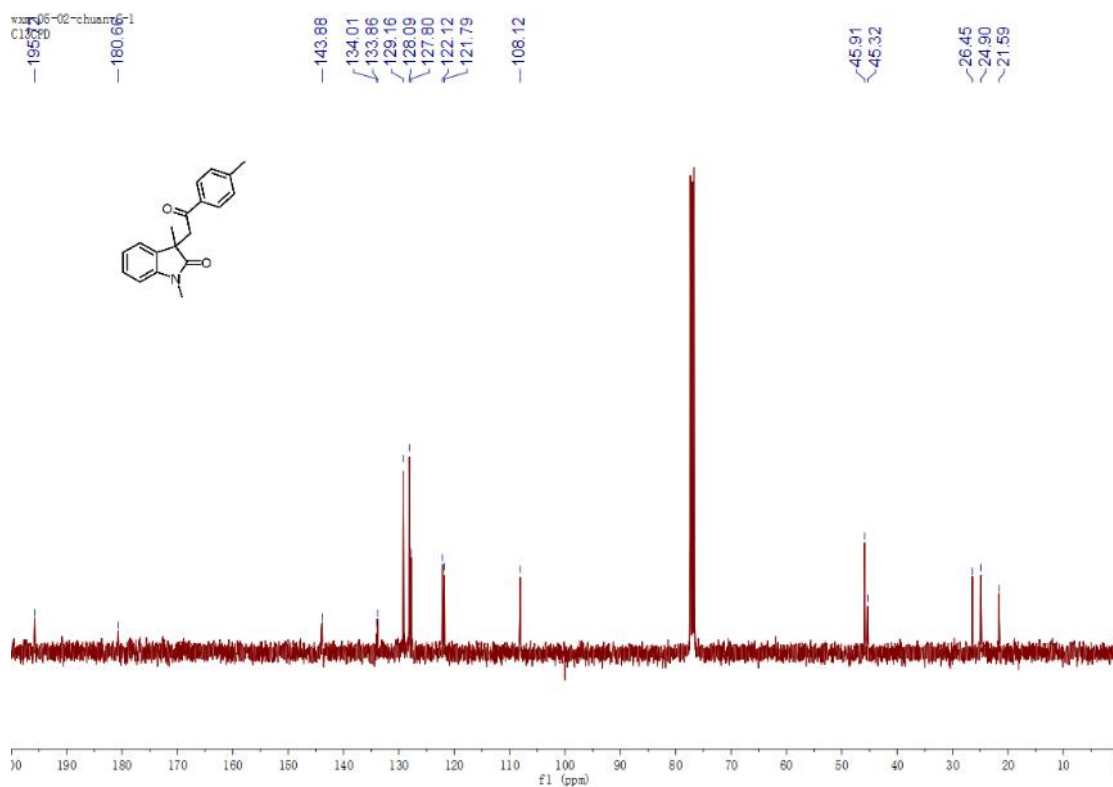

## 9. References

- (1). Fang, S.; Jiang, G.; Li, M.; Liu, Z.; Jiang, H.; Wu, W., Palladium-catalyzed regioselective C–H alkylation of indoles with haloalkynes: access to functionalized 7-alkynylindoles. *Chem. Comm.* **2019**, *55*, 13769–13772.
- (2). Zhou, P. J.; Li, C. K.; Zhou, S. F.; Shoberu, A.; Zou, J. P., Copper-catalyzed TEMPO oxidative cleavage of 1,3-diketones and beta-keto esters for the synthesis of 1,2-diketones and alpha-keto esters. *Org. Biomol. Chem.* **2017**, *15*, 2629–2637.
- (3). Zhou, M.-B.; Song, R.-J.; Ouyang, X.-H.; Liu, Y.; Wei, W.-T.; Deng, G.-B.; Li, J.-H., Metal-free oxidative tandem coupling of activated alkenes with carbonyl C(sp<sup>2</sup>)–H bonds and aryl C(sp<sup>2</sup>)–H bonds using TBHP. *Chemical Science* **2013**, *4*, 2690–2694.
